# Supplementary material for: Design and Synthesis of New Benzophenone Derivatives with In Vivo Anti-Inflammatory Activity through Dual Inhibition of Edema and Neutrophil Recruitment
Source: PubMed Central journal article supplement (PMC6222881; doi:10.3390/molecules23081859), 2018-07-26
Supplement: molecules-23-01859-s001.pdf [file molecules-23-01859-s001.pdf]

# Design and Synthesis of New Benzophenone Derivatives with in Vivo Anti-Inflammatory Activity Through Dual Inhibition of Edema and Neutrophil Recruitment

Jaqueline P. Januario, Thiago B. de Souza, Stefânia N. Lavorato, Tatiane C. S. Maiolini, Olívia S. Domingos, João L. Baldim, Laís R. S. Folquitto, Marisi G. Soares, Daniela A. Chagas-Paula, Danielle F. Dias, Marcelo H. dos Santos.

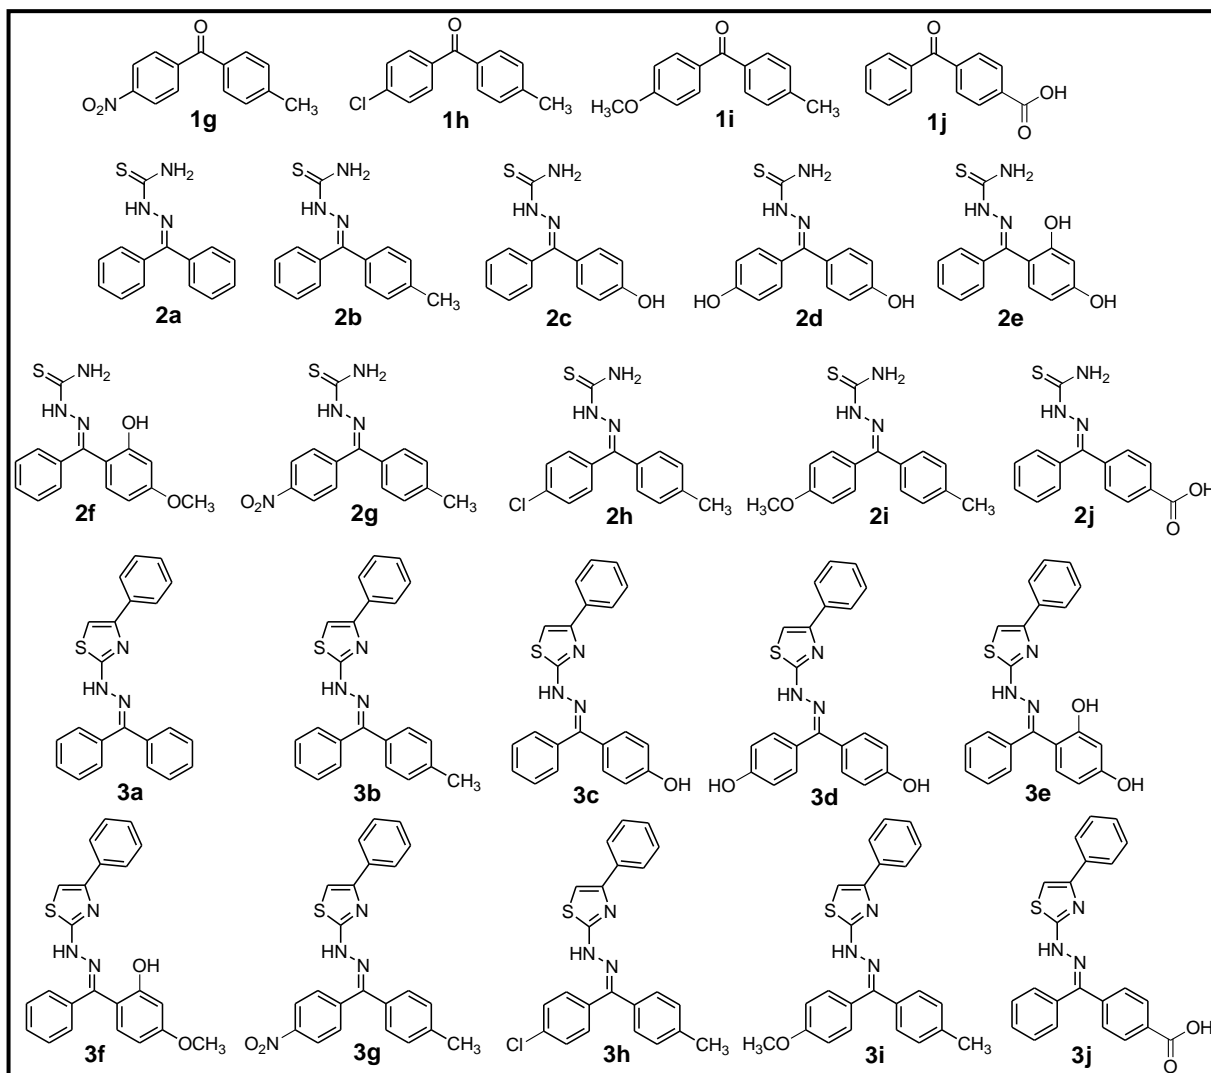

## SUPPLEMENTARY MATERIALS

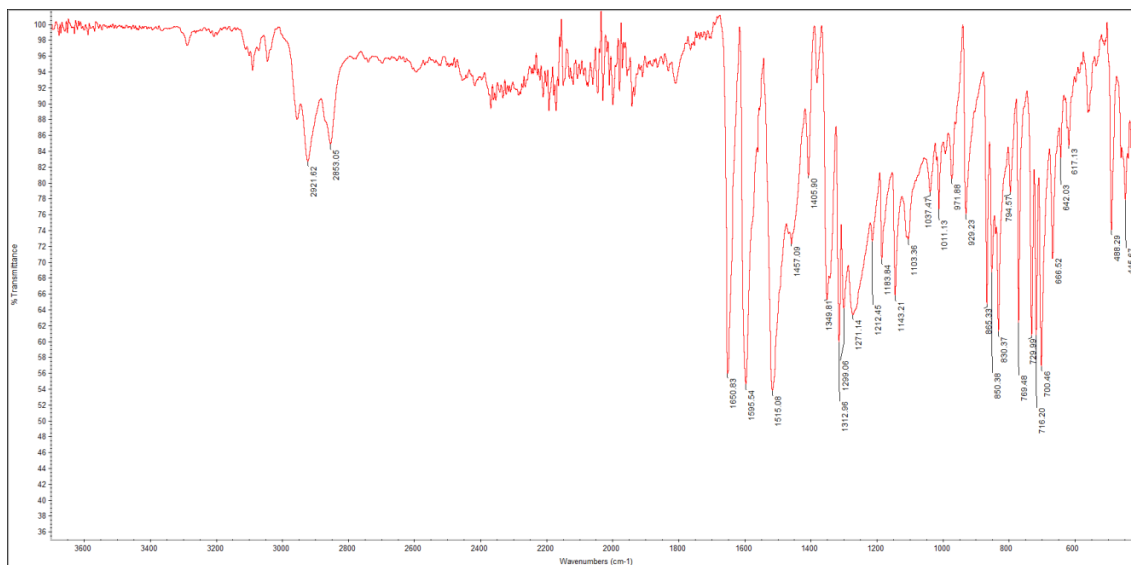

Figure S1: IR spectra of **1g**.

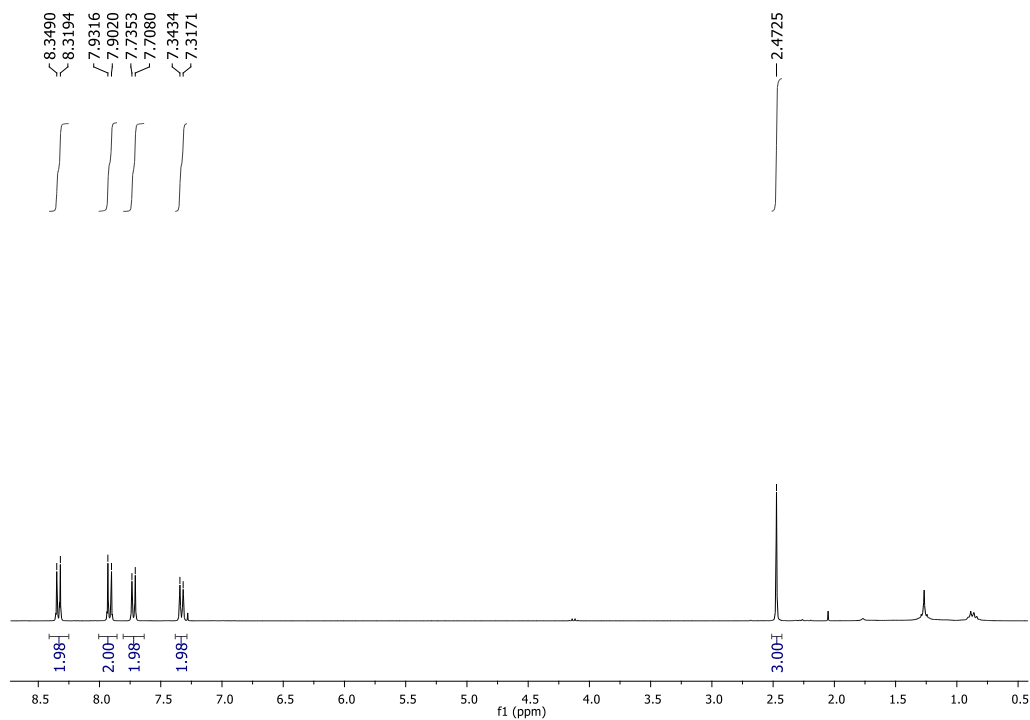

Figure S2: <sup>1</sup>H NMR spectra of **1g** (CDCl<sub>3</sub>, 300 MHz).

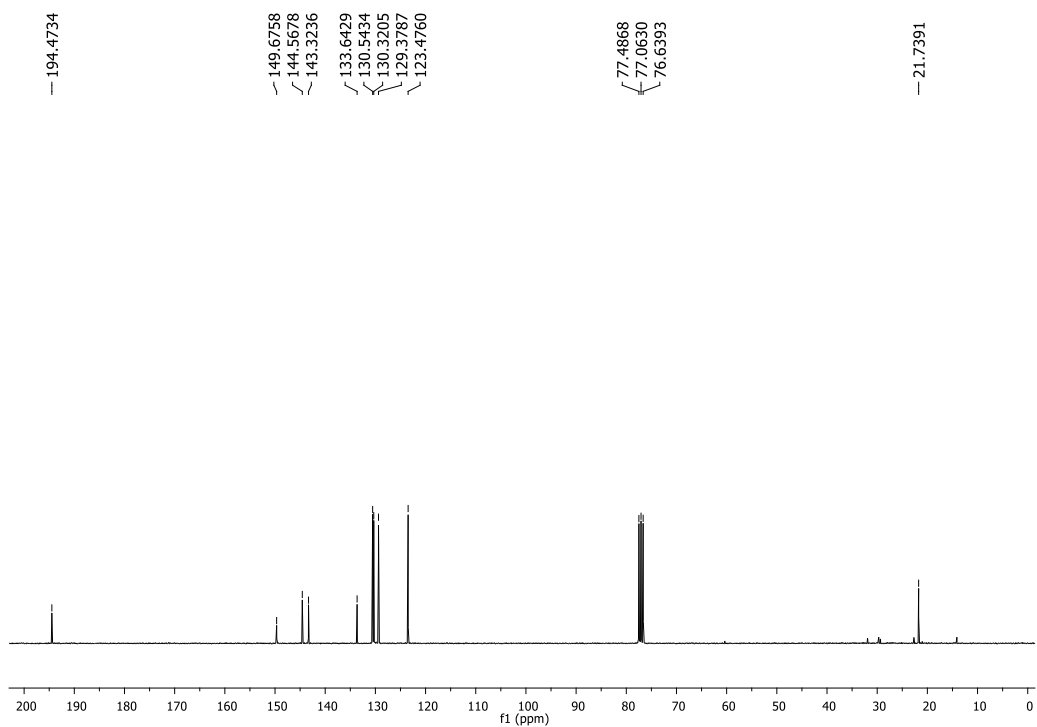

Figure S3:  $^{13}\text{C}$  NMR spectra of **1g** ( $\text{CDCl}_3$ , 75 MHz).

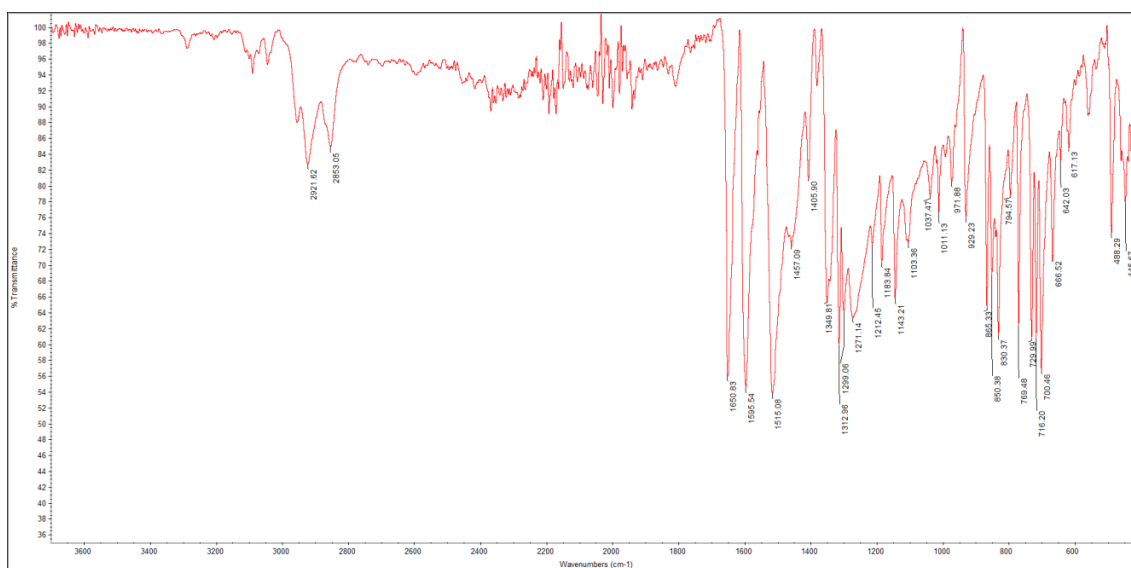

Figure S4: IR spectra of **1h**.

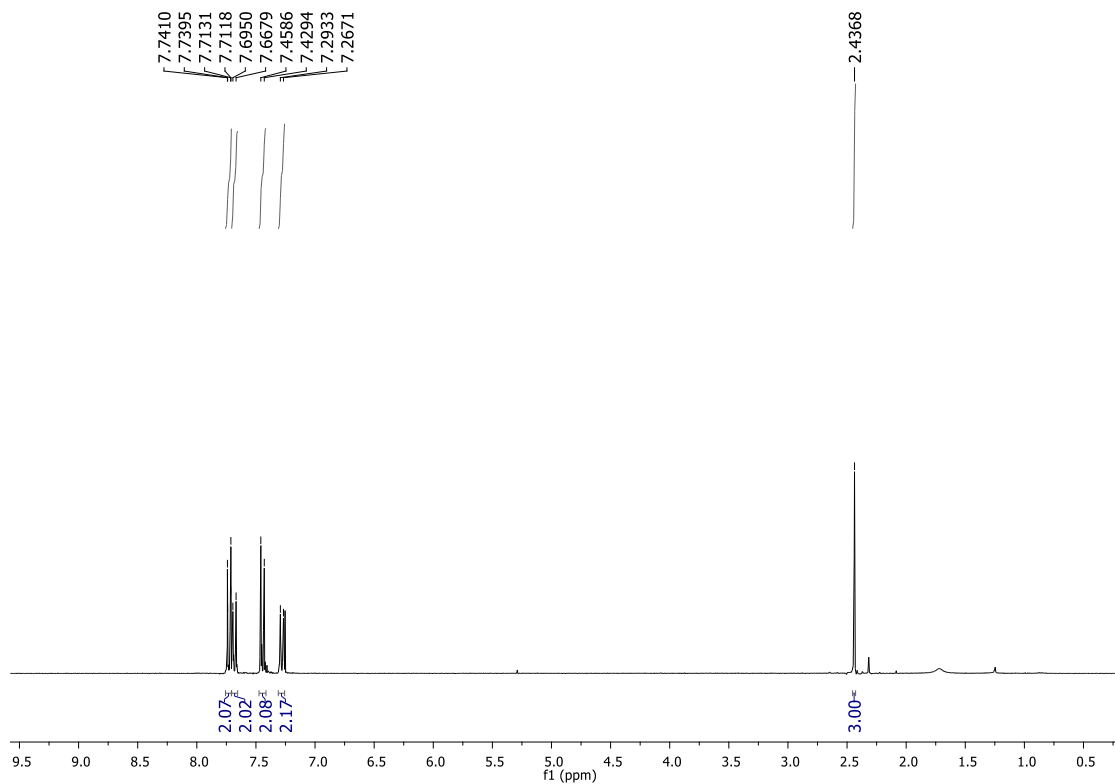

Figure S5:  $^1\text{H}$  NMR spectra of **1h** ( $\text{CDCl}_3$ , 300 MHz).

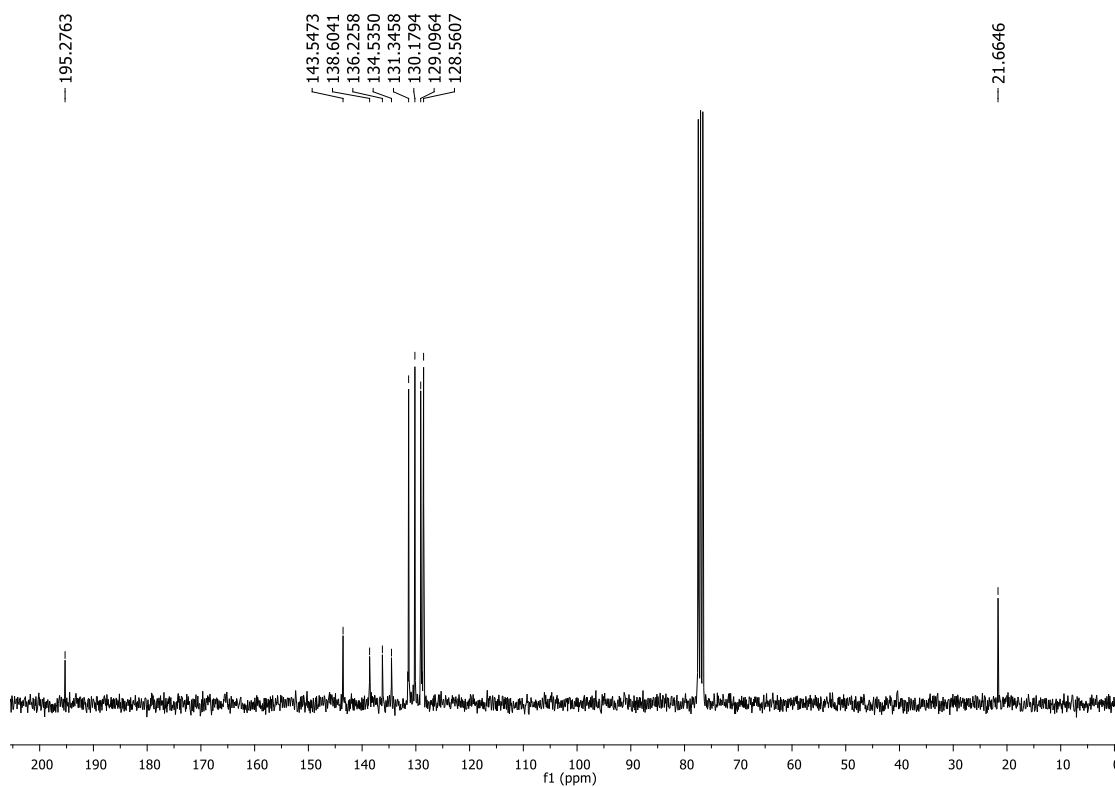

Figure S6:  $^{13}\text{C}$  NMR spectra of **1h** ( $\text{CDCl}_3$ , 75 MHz).

98\_L1 #169 RT: 1.02 AV: 1 NL: 1,48E8  
T: FTMS + p ESIFull ms [120,00-1200,00]

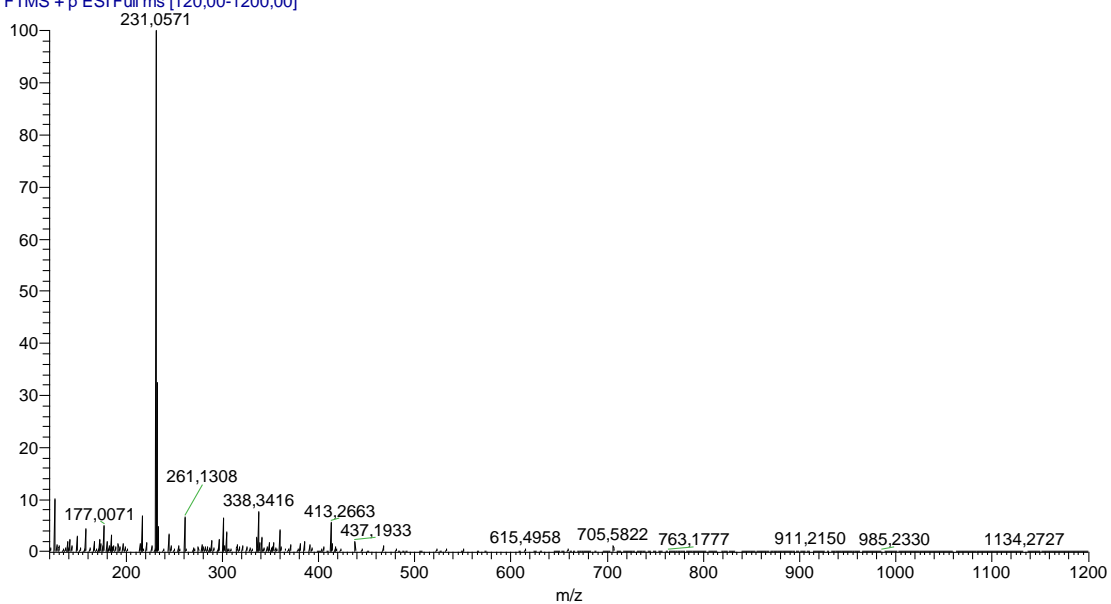

Figure S7: HRMS spectra of 1h.

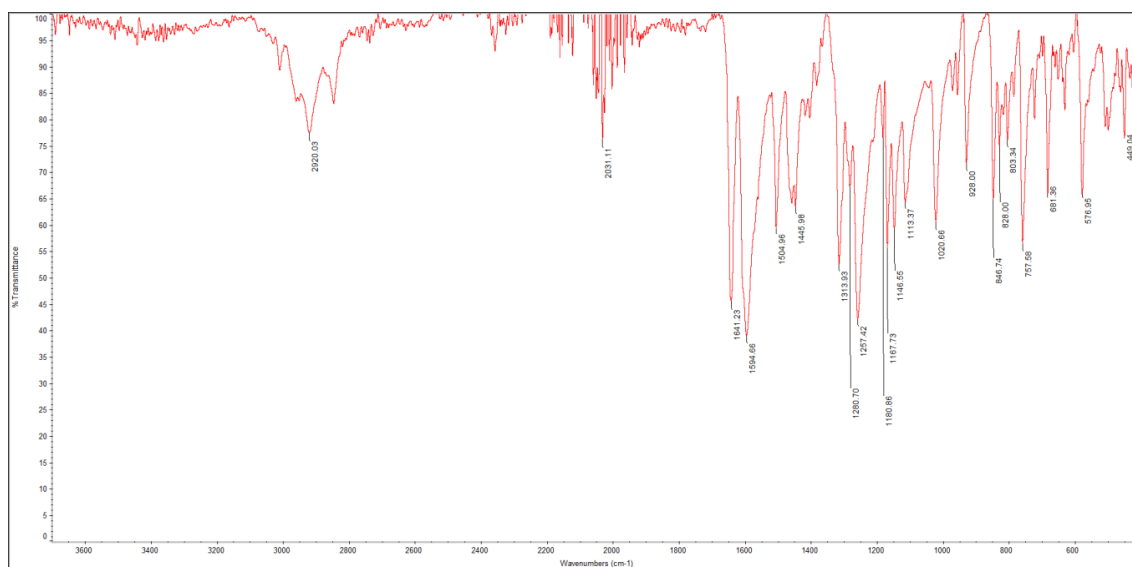

Figure S8: IR spectra of 1i.

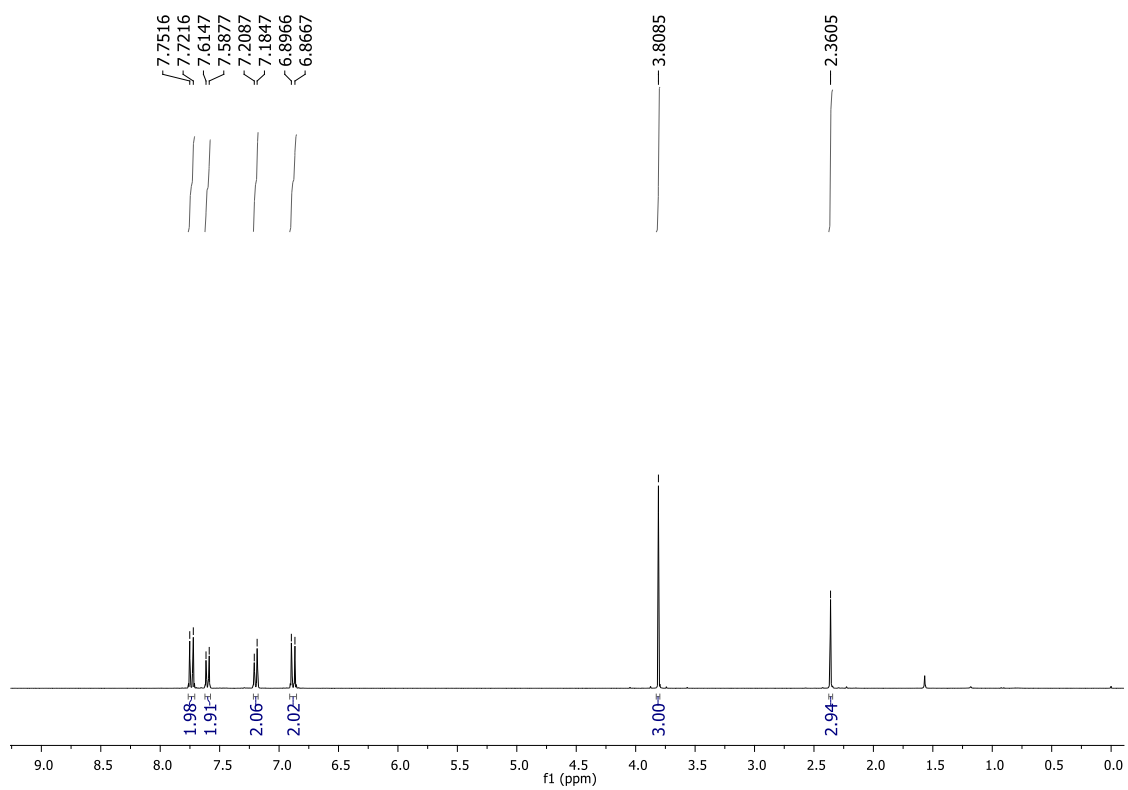

Figure S9:  $^1\text{H}$  NMR spectra of **1i** ( $\text{CDCl}_3$ , 300 MHz).

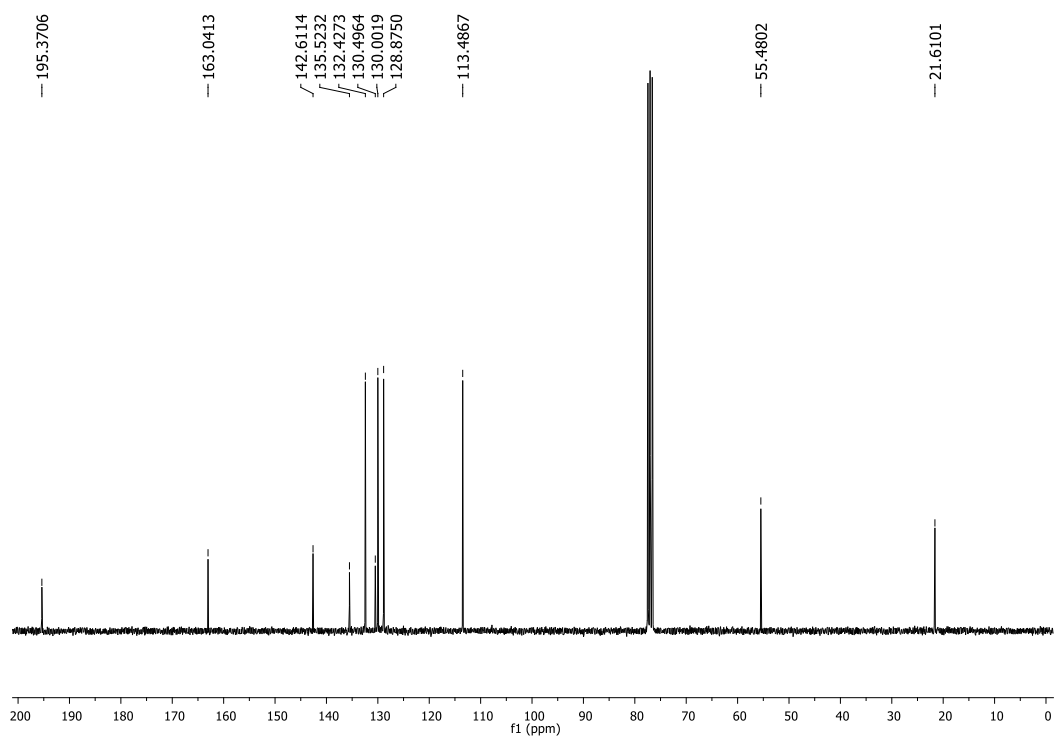

Figure S10:  $^{13}\text{C}$  NMR spectra of **1i** ( $\text{CDCl}_3$ , 75 MHz).

101\_L4 #173 RT: 1,04 AV: 1 NL: 4,52E8  
T: FTMS + p ESI Full ms [120,00-1200,00]

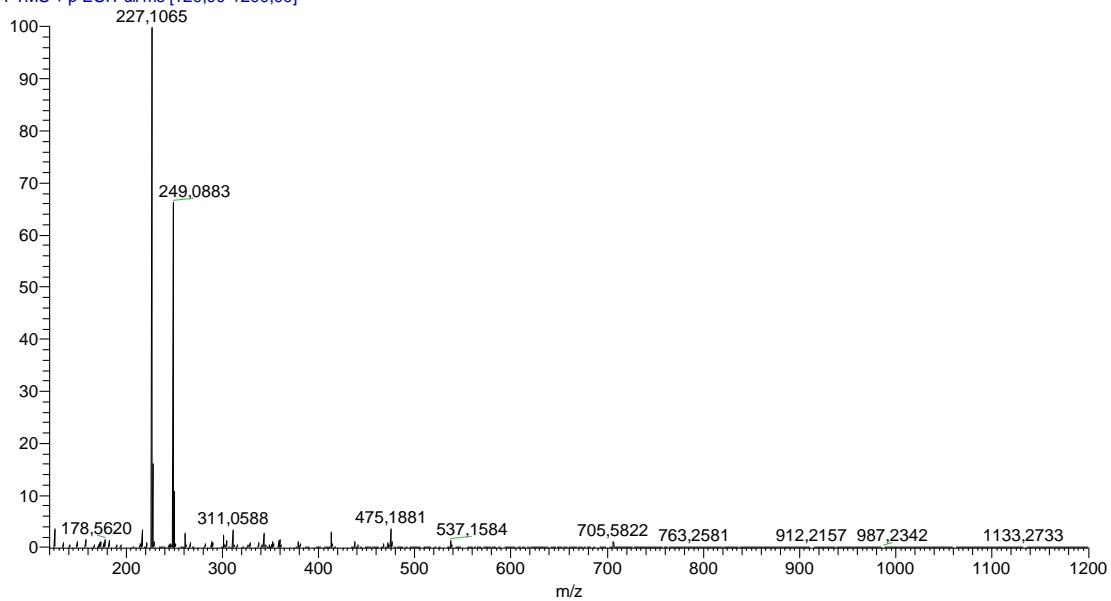

Figure S11: HRMS spectra of 1i.

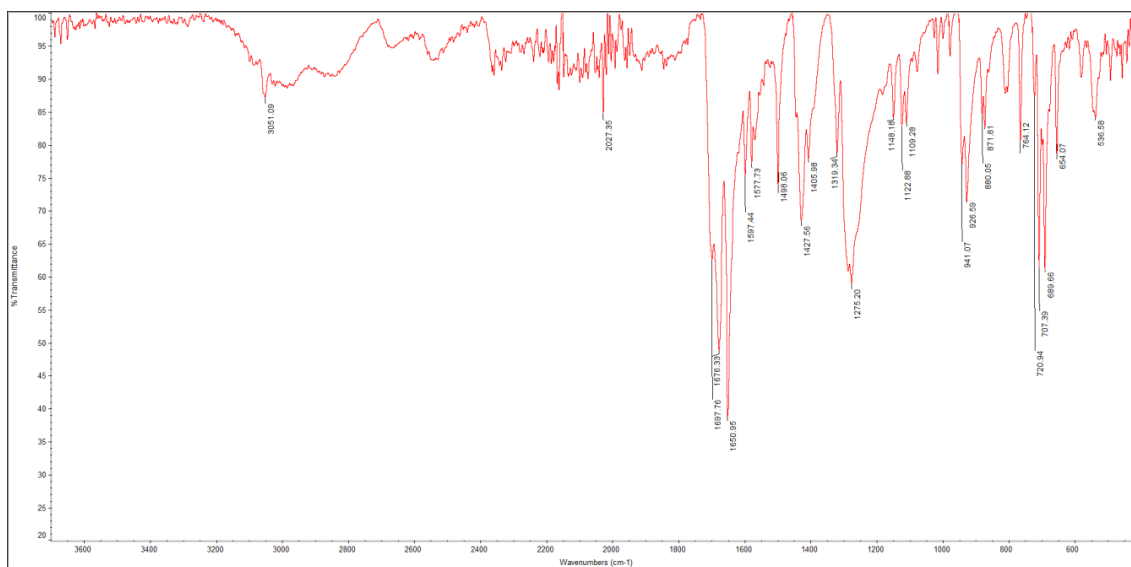

Figure S12: IR spectra of 1j.

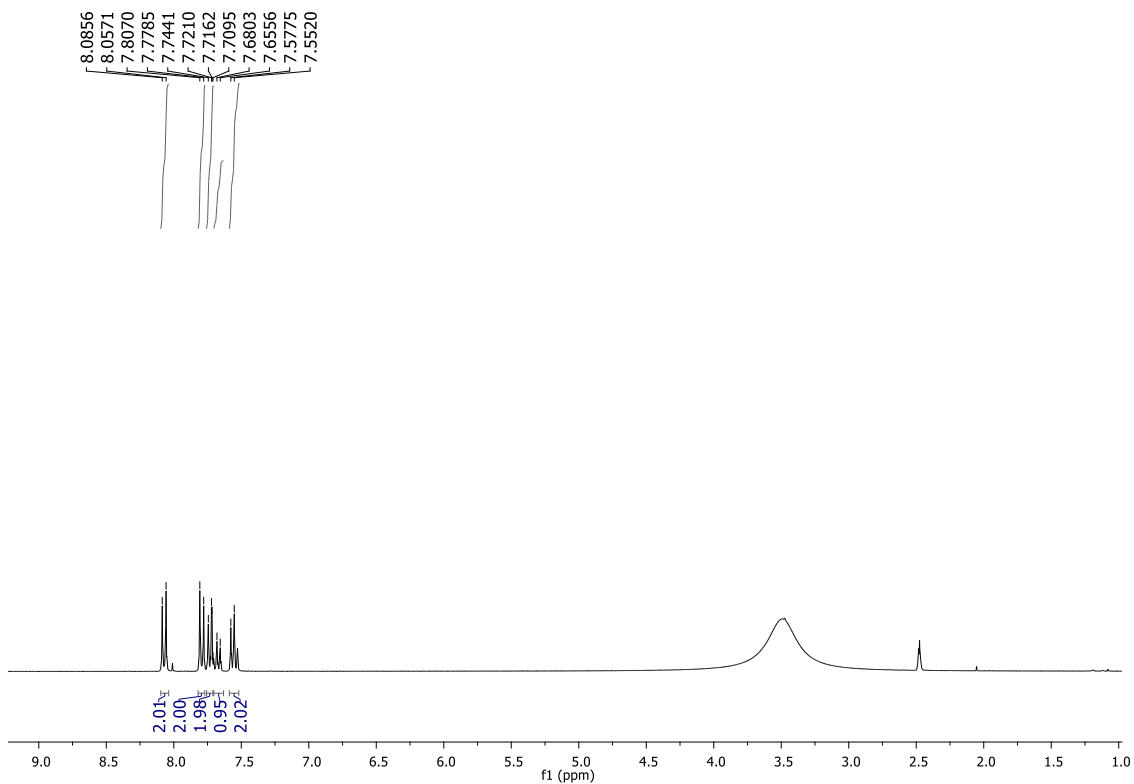

Figure S13:  $^1\text{H}$  NMR spectra of **1j** (DMSO- $d_6$ , 300 MHz).

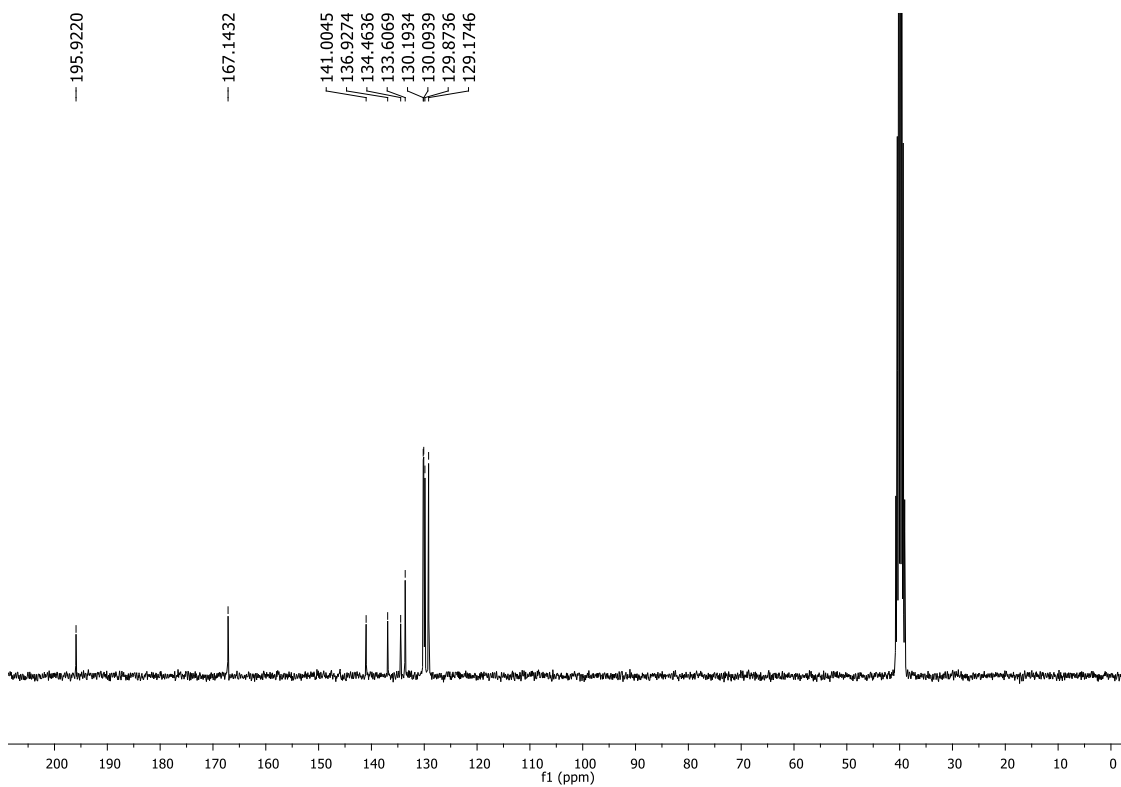

Figure S14:  $^{13}\text{C}$  NMR spectra of **1j** (DMSO- $d_6$ , 75 MHz).



99\_L2 #355 RT: 2.16 AV: 1 NL: 1,86E8  
T: FTMS - p ESI Full ms [120,00-1200,00]

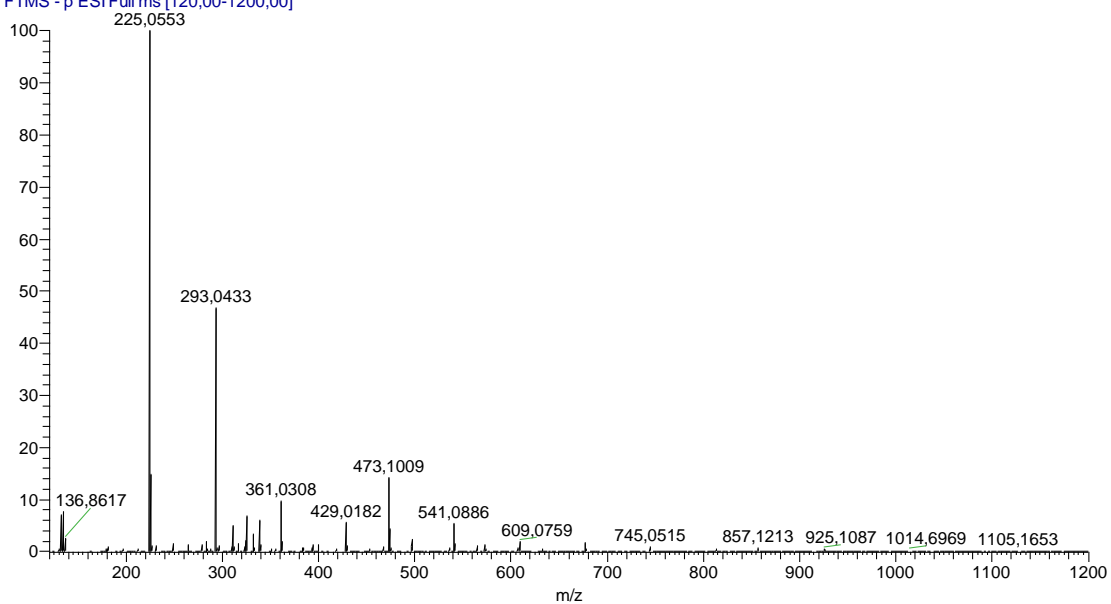

Figure S15: HRMS spectra of 1j.

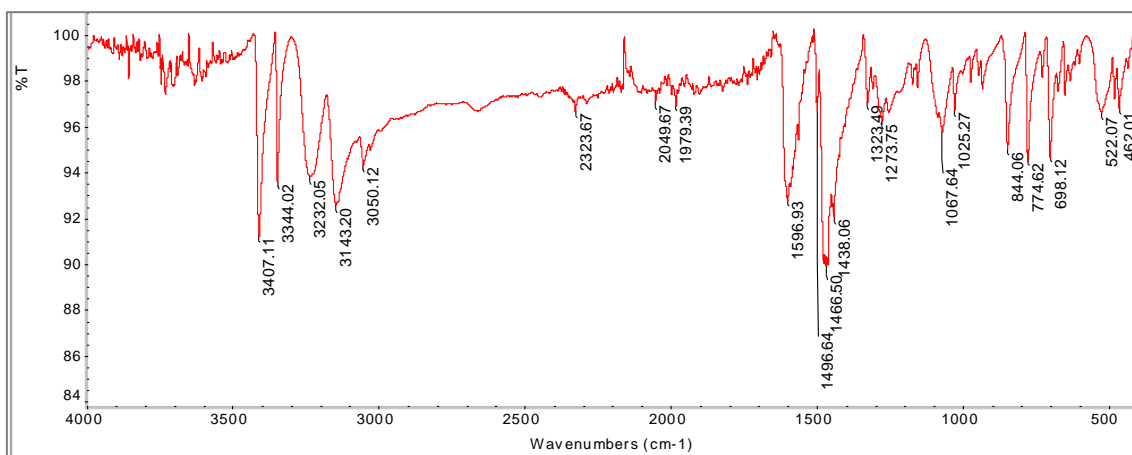

Figure S16: IR spectra of 2a.

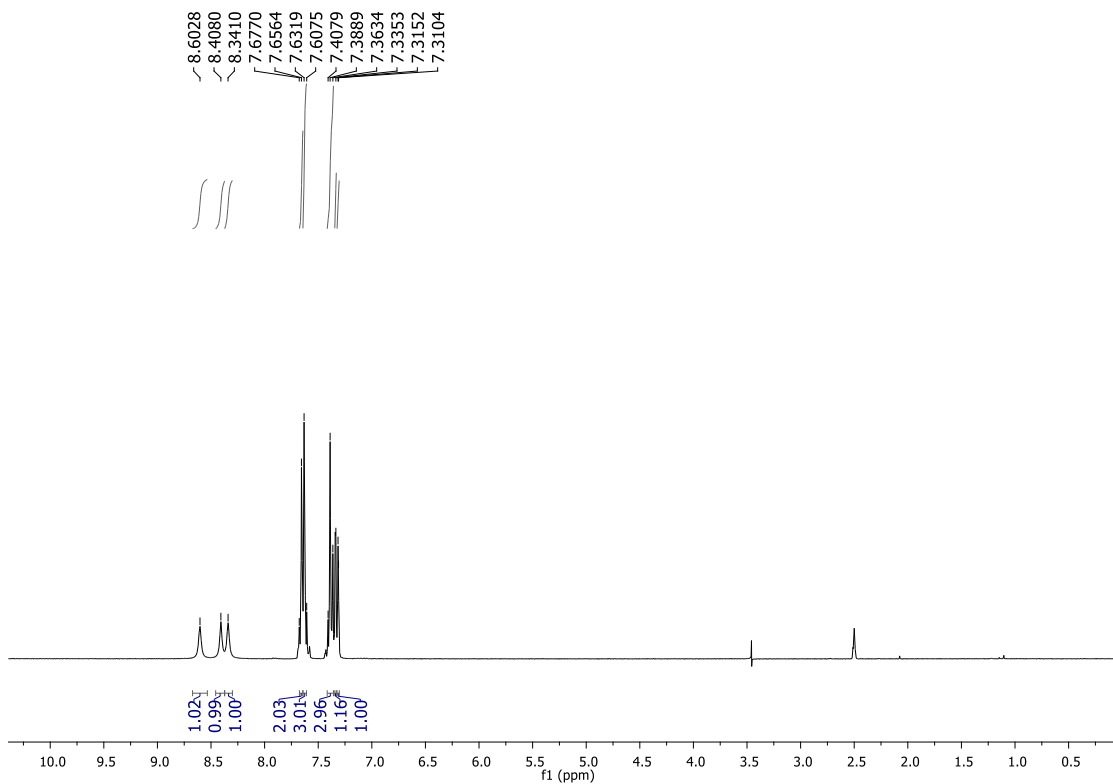

Figure S17:  $^1\text{H}$  NMR spectra of **2a** ( $\text{DMSO-}d_6$ , 300 MHz).

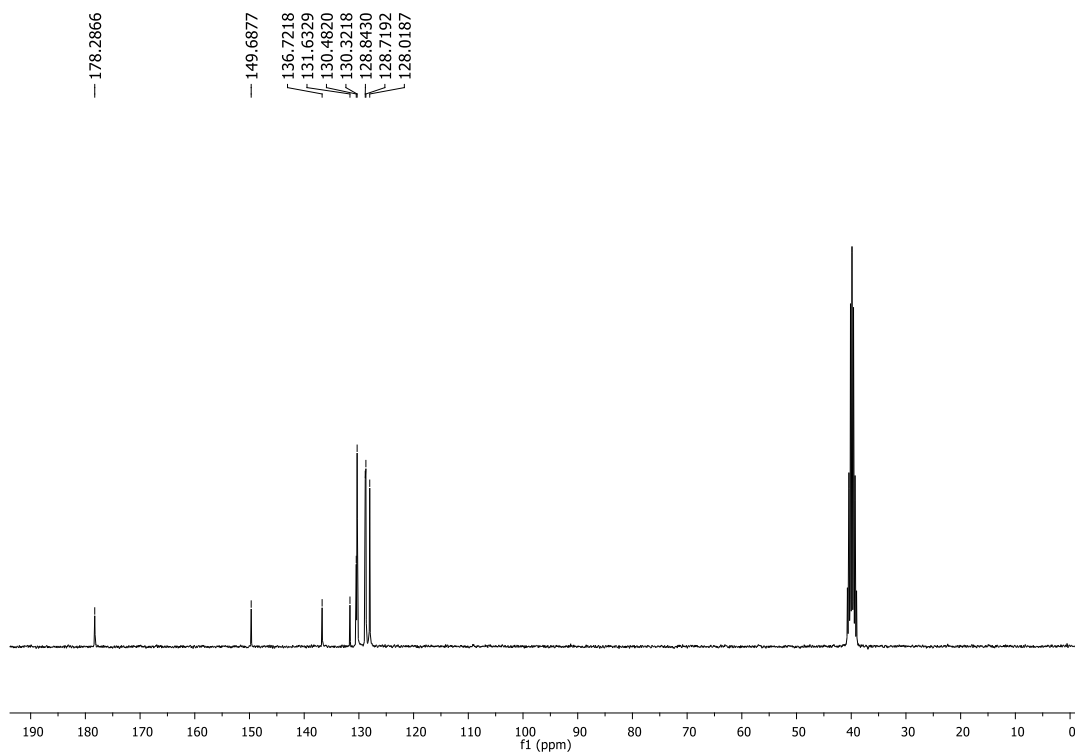

Figure S18:  $^{13}\text{C}$  NMR spectra of **2a** ( $\text{DMSO-}d_6$ , 75 MHz).

76\_JPD-14 #353 RT: 2,15 AV: 1 NL: 5,88E8  
T: FTMS + p ESI Full lock ms [120,00-1200,00]

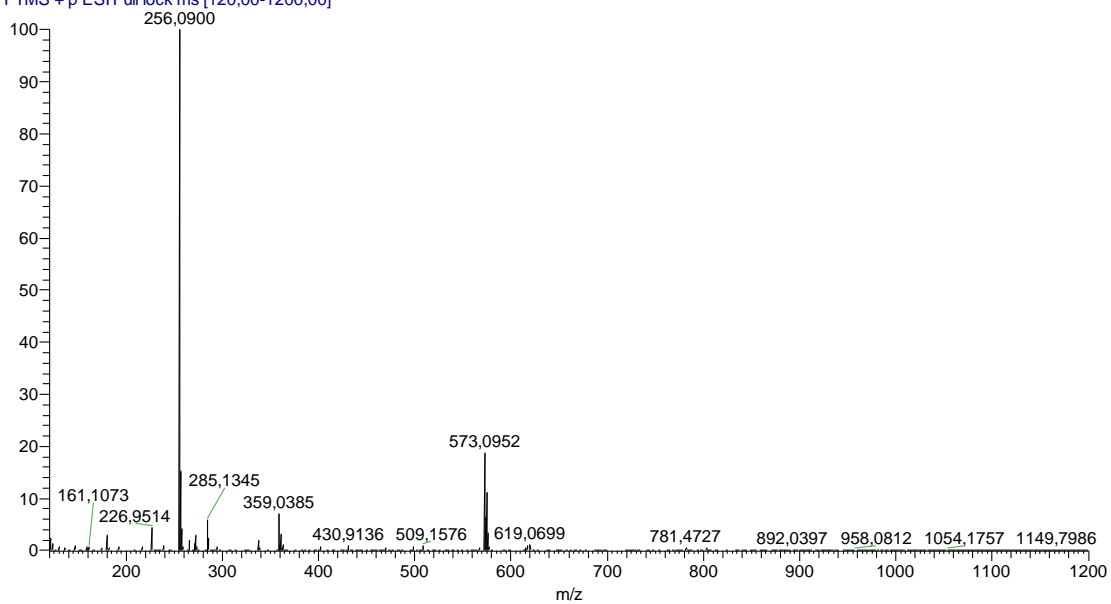

Figure S19: HRMS spectra of 2a.

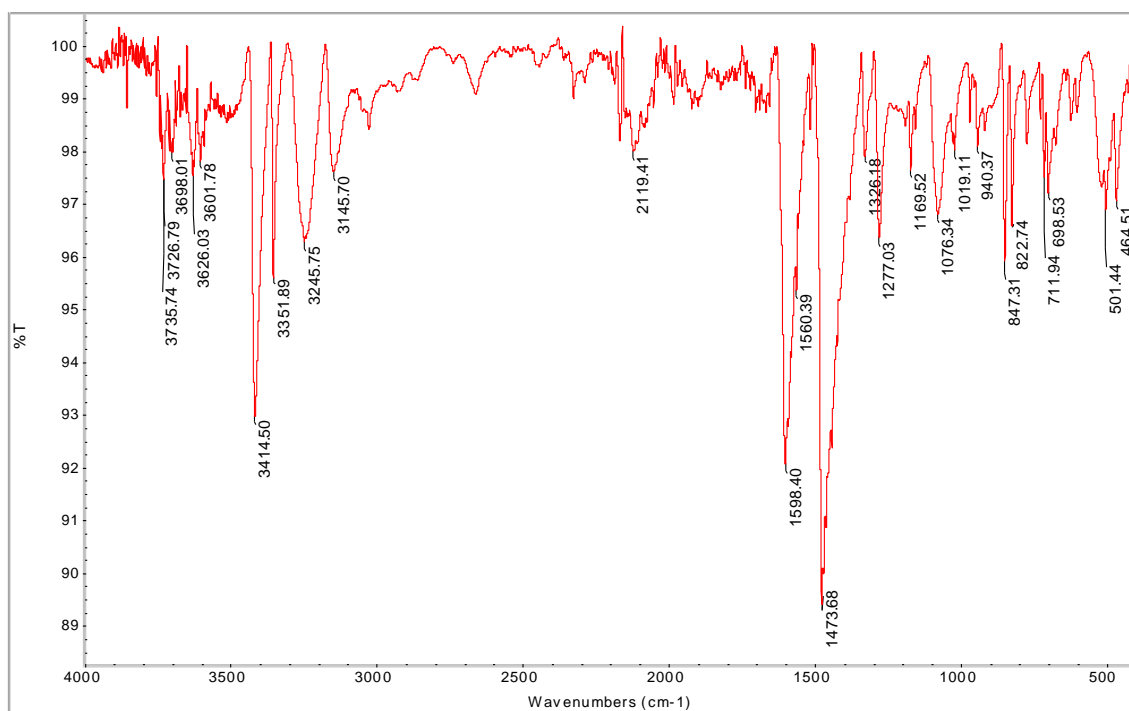

Figure S20: IR spectra of 2b.

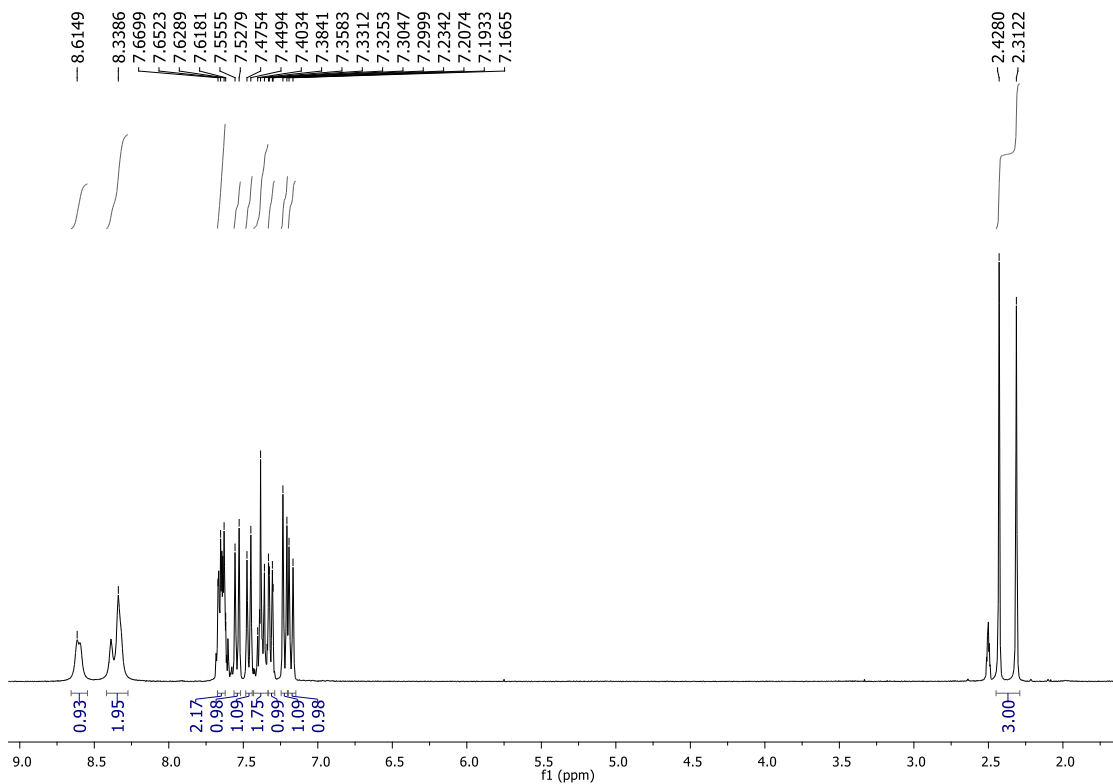

Figure S21:  $^1\text{H}$  NMR spectra of **2b** ( $\text{DMSO-}d_6$ , 300 MHz).

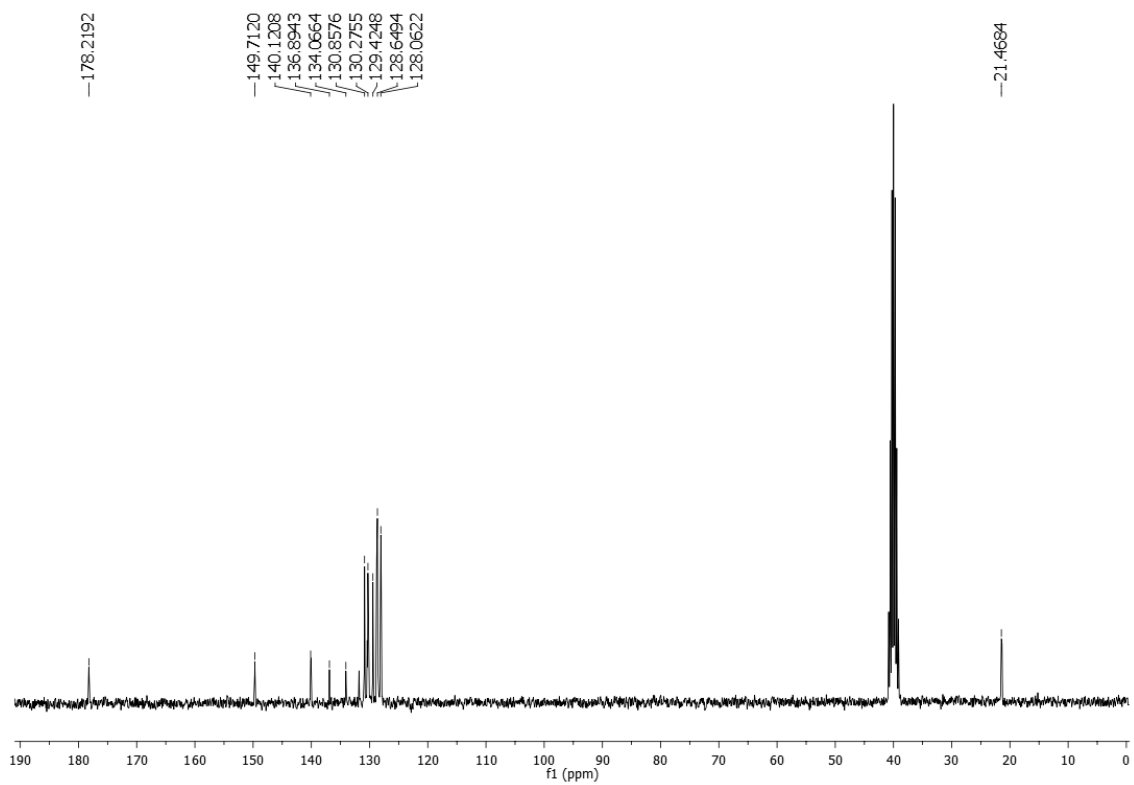

Figure S22:  $^{13}\text{C}$  NMR spectra of **2b** ( $\text{DMSO-}d_6$ , 75 MHz).

77\_JPD-15 #381 RT: 2.33 AV: 1 NL: 4.64E8  
T: FTMS + p ESI Full lock ms [120.00-1200.00]

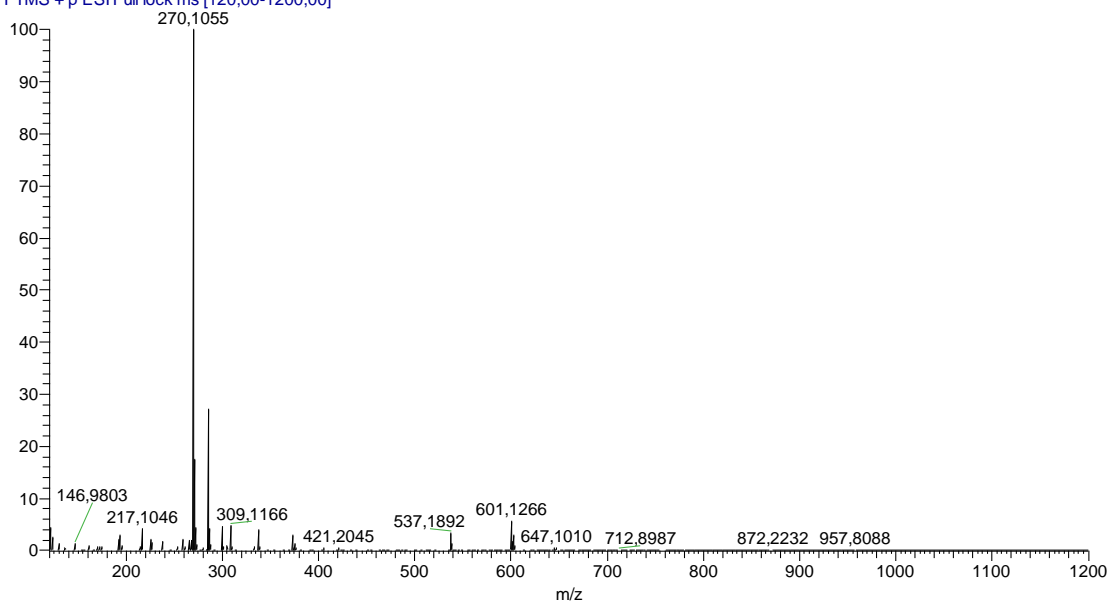

Figure S23: HRMS spectra of 2b.

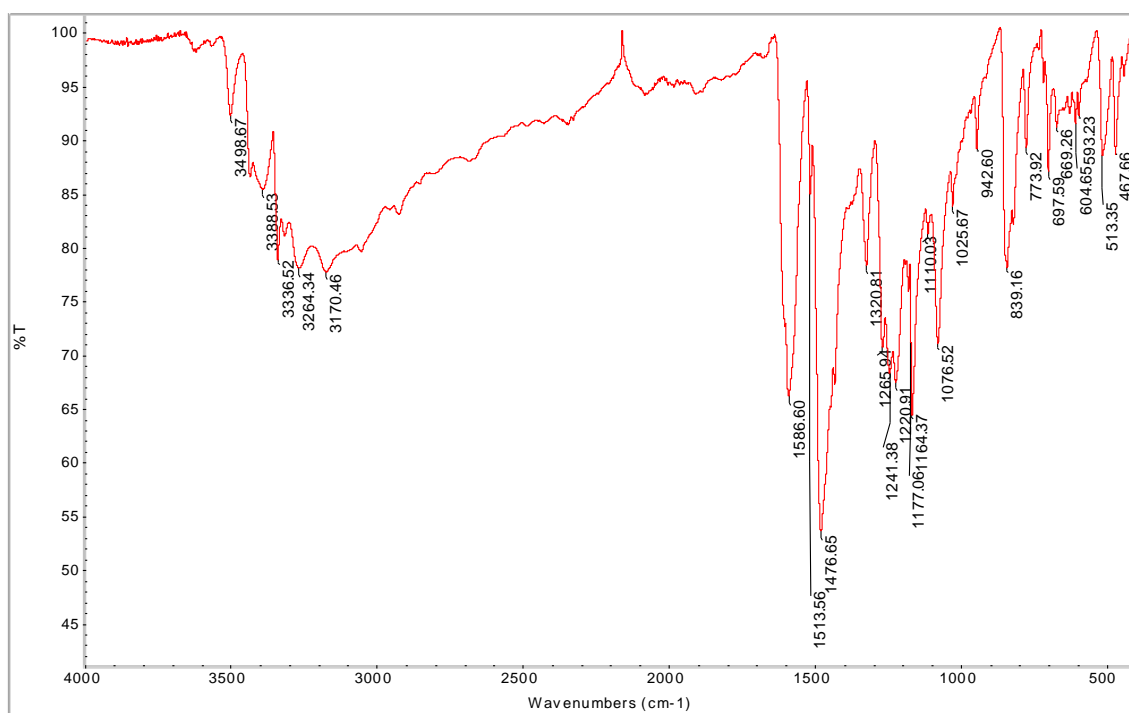

Figure S24: IR spectra of 2c.

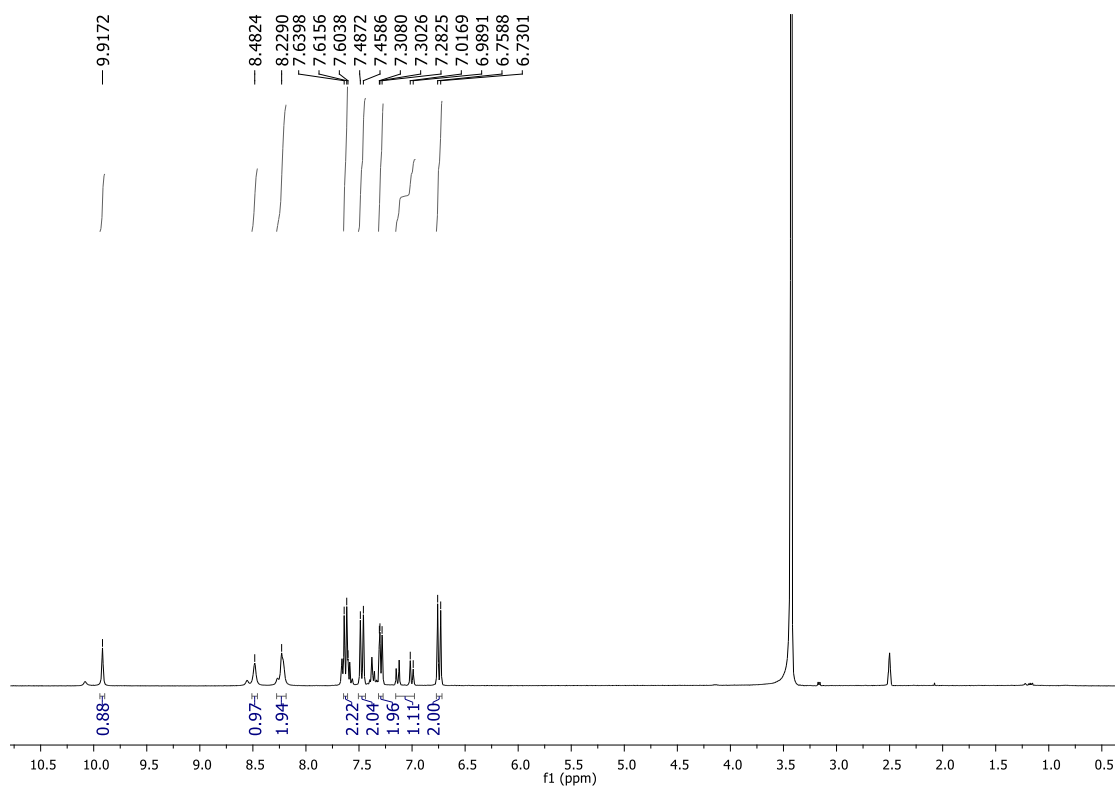

Figure S25:  $^1\text{H}$  NMR spectra of **2c** ( $\text{DMSO-}d_6$ , 300 MHz).

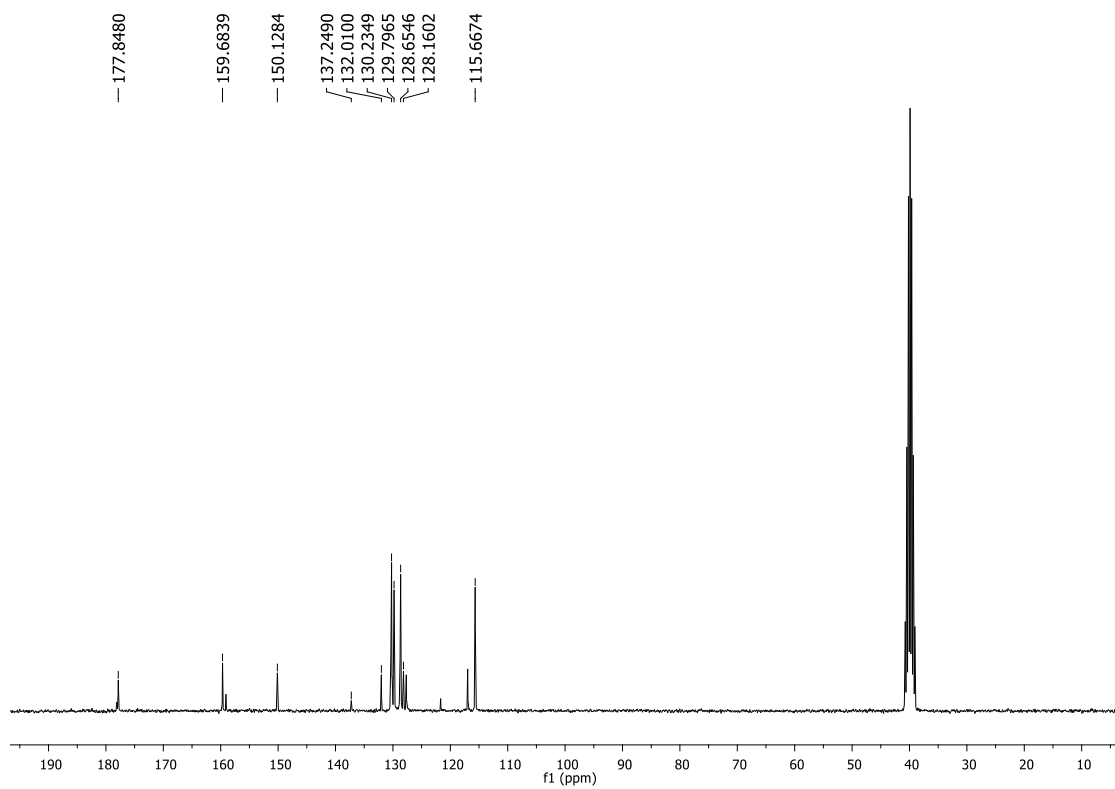

Figure S26:  $^{13}\text{C}$  NMR spectra of **2c** ( $\text{DMSO-}d_6$ , 75 MHz).

78\_JPD16 #173 RT: 1,04 AV: 1 NL: 1,19E8  
T: FTMS + p ESI Full lock ms [120,00-1200,00]

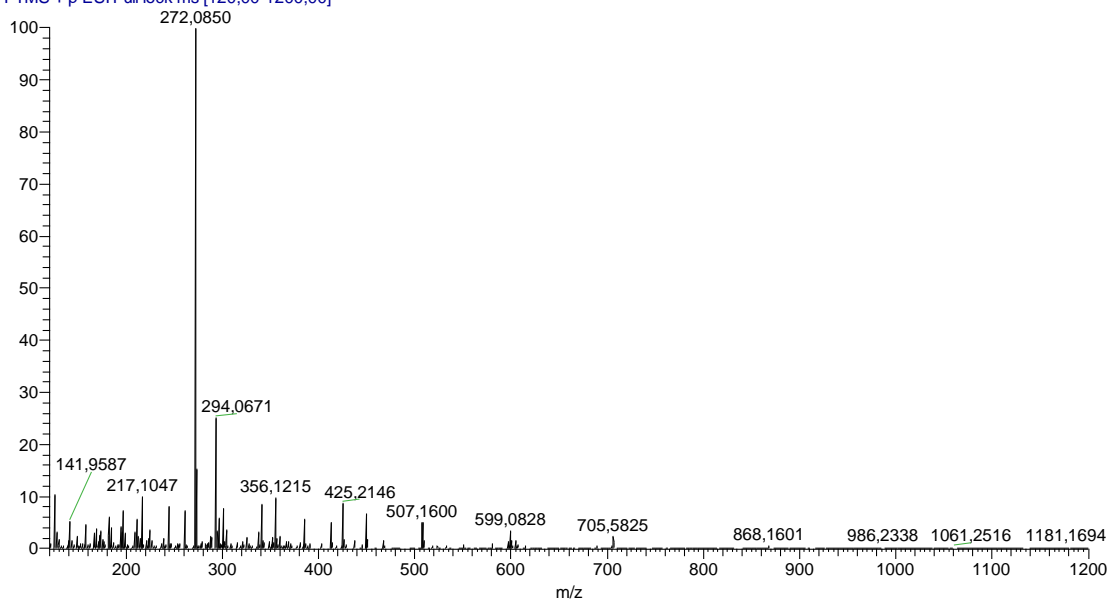

Figure S27: HRMS spectra of 2c.

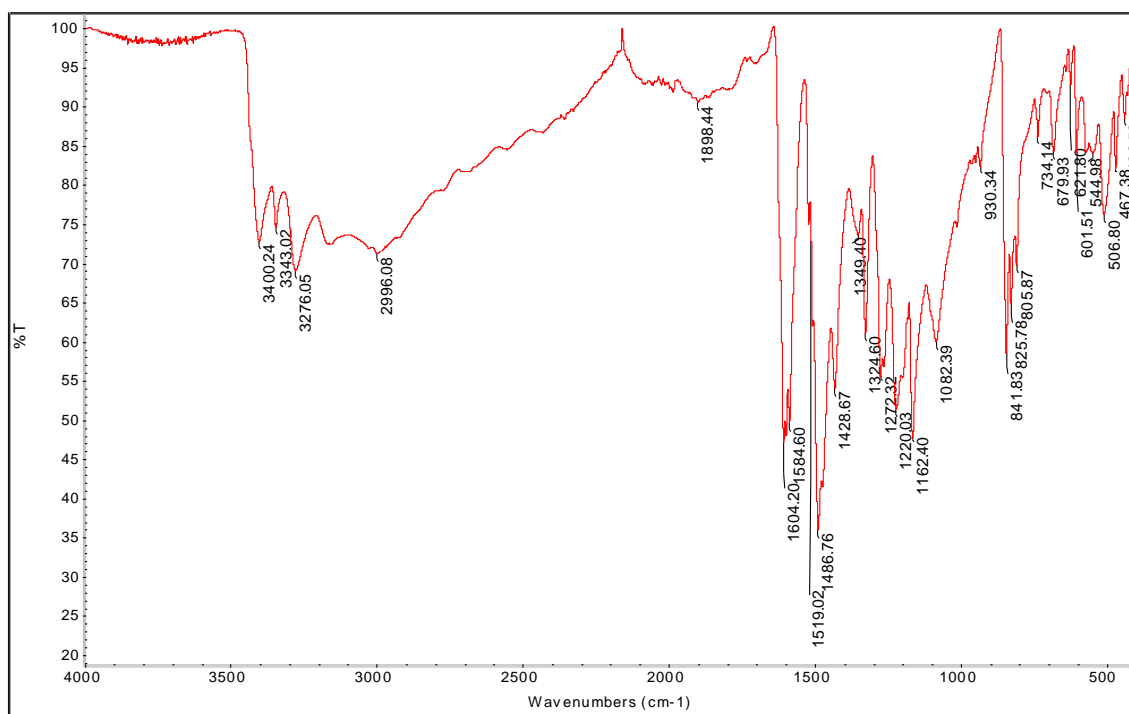

Figure S28: IR spectra of 2d.

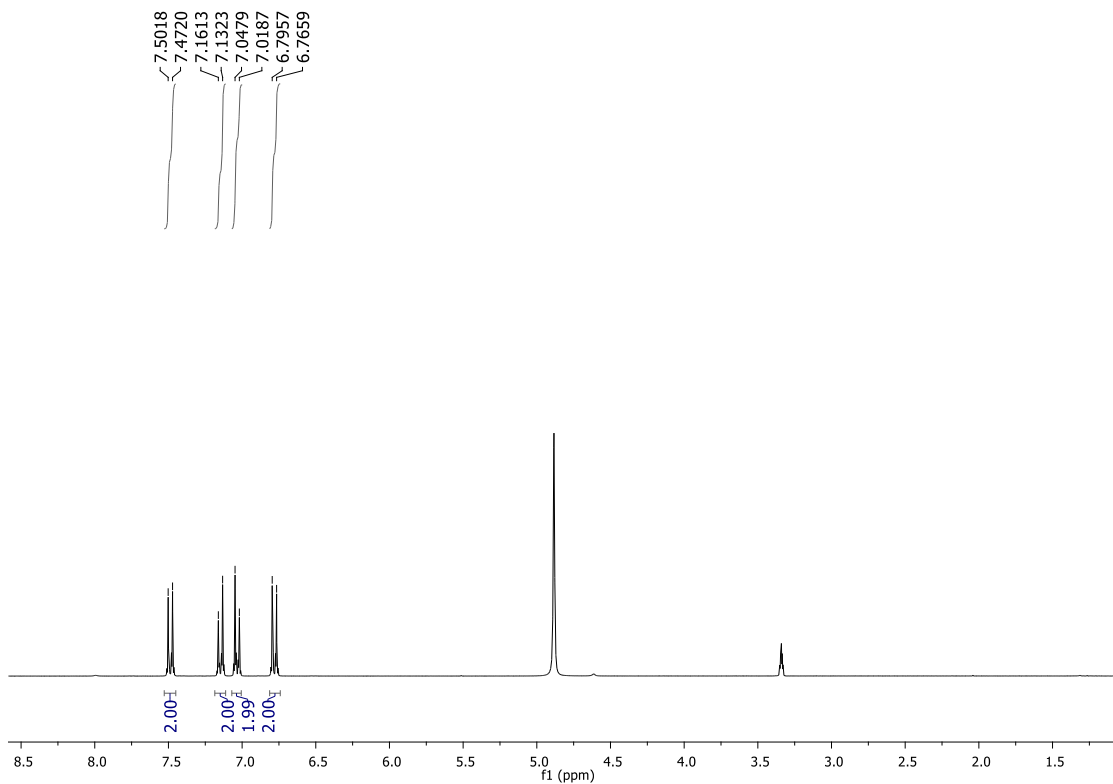

Figure S29:  $^1\text{H}$  NMR spectra of **2d** ( $\text{CD}_3\text{OD}$ , 300 MHz).

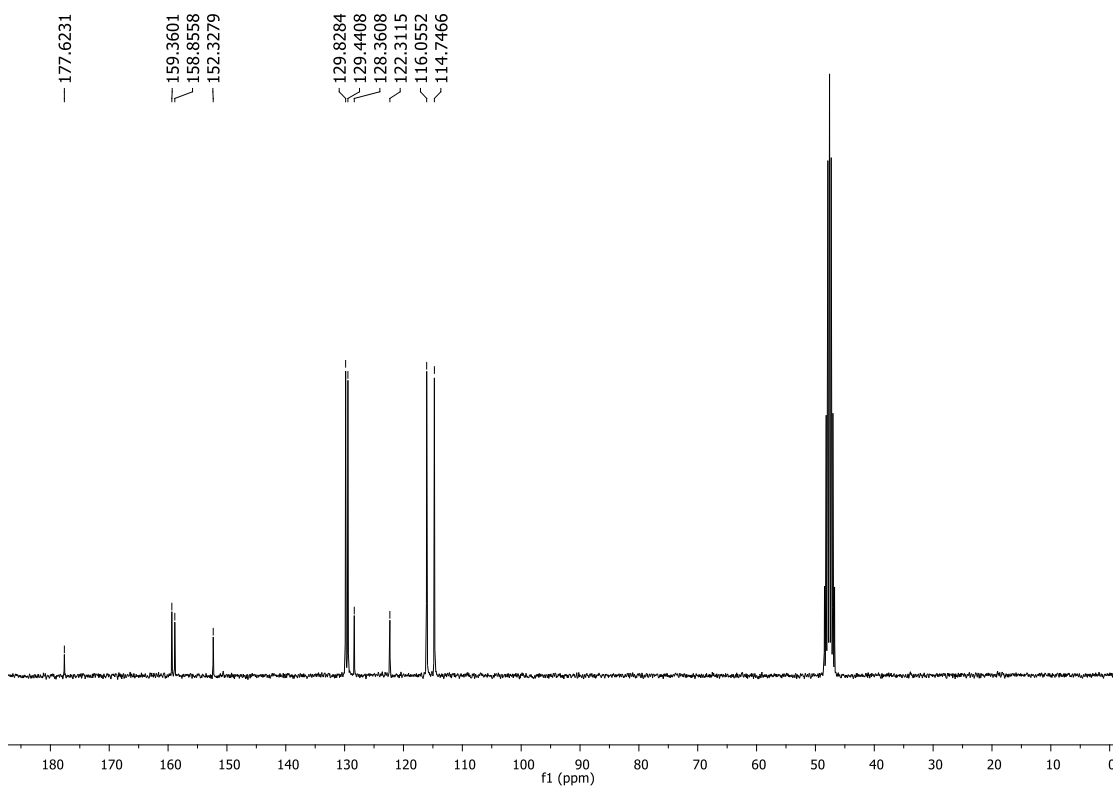

Figure S30:  $^{13}\text{C}$  NMR spectra of **2d** ( $\text{CD}_3\text{OD}$ , 75 MHz).



79\_JPD-17 #341 RT: 2.07 AV: 1 NL: 1,38E8  
T: FTMS + p ESI Full lock ms [120,00-1200,00]

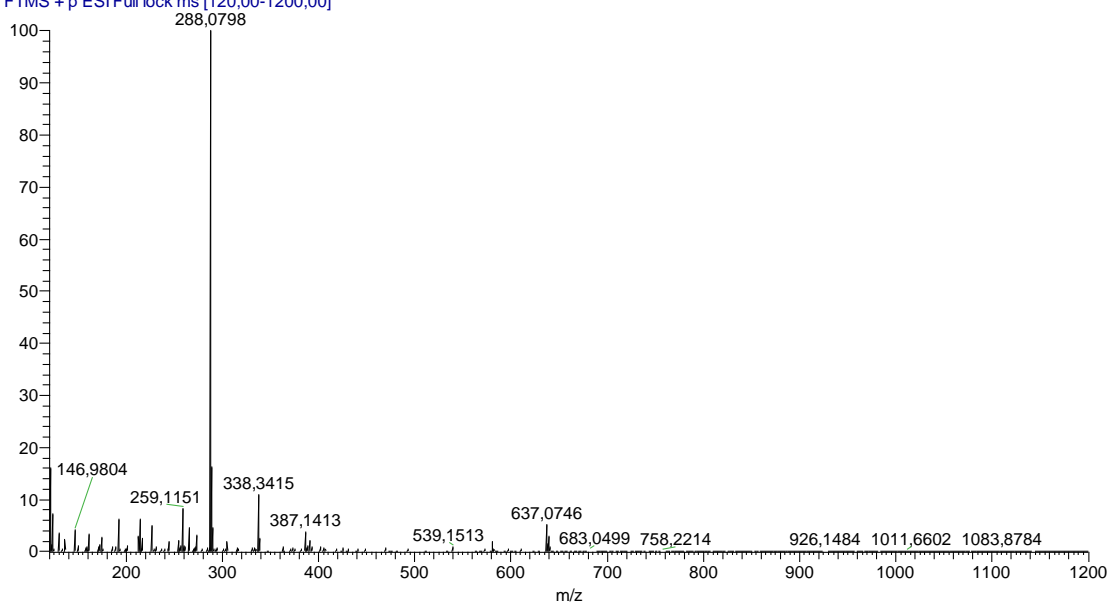

Figure S31: HRMS spectra of 2d.

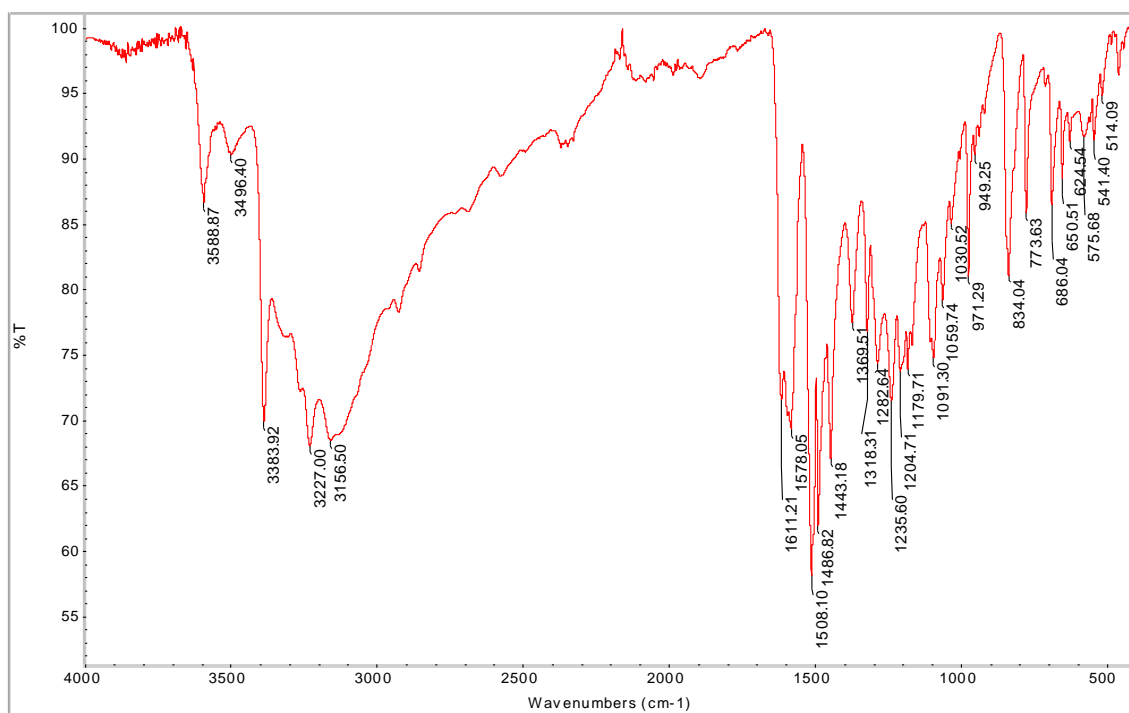

Figure S32: IR spectra of 2e.

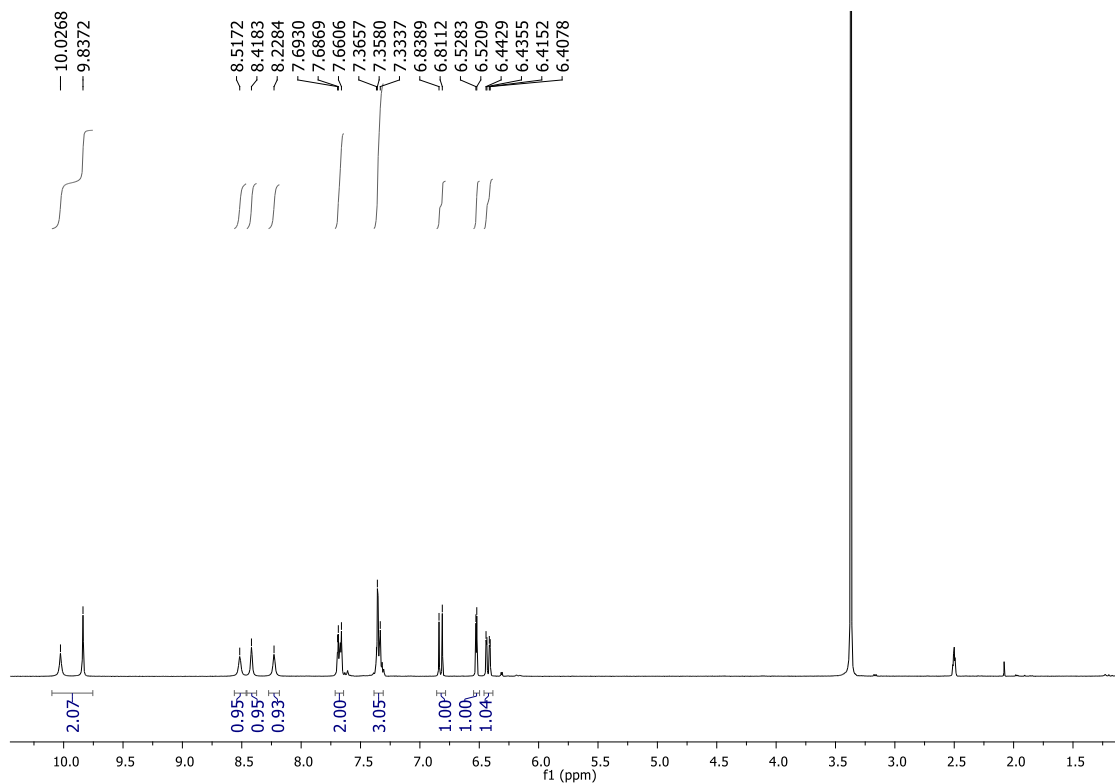

Figure S33:  $^1\text{H}$  NMR spectra of **2e** ( $\text{DMSO-}d_6$ , 300 MHz).

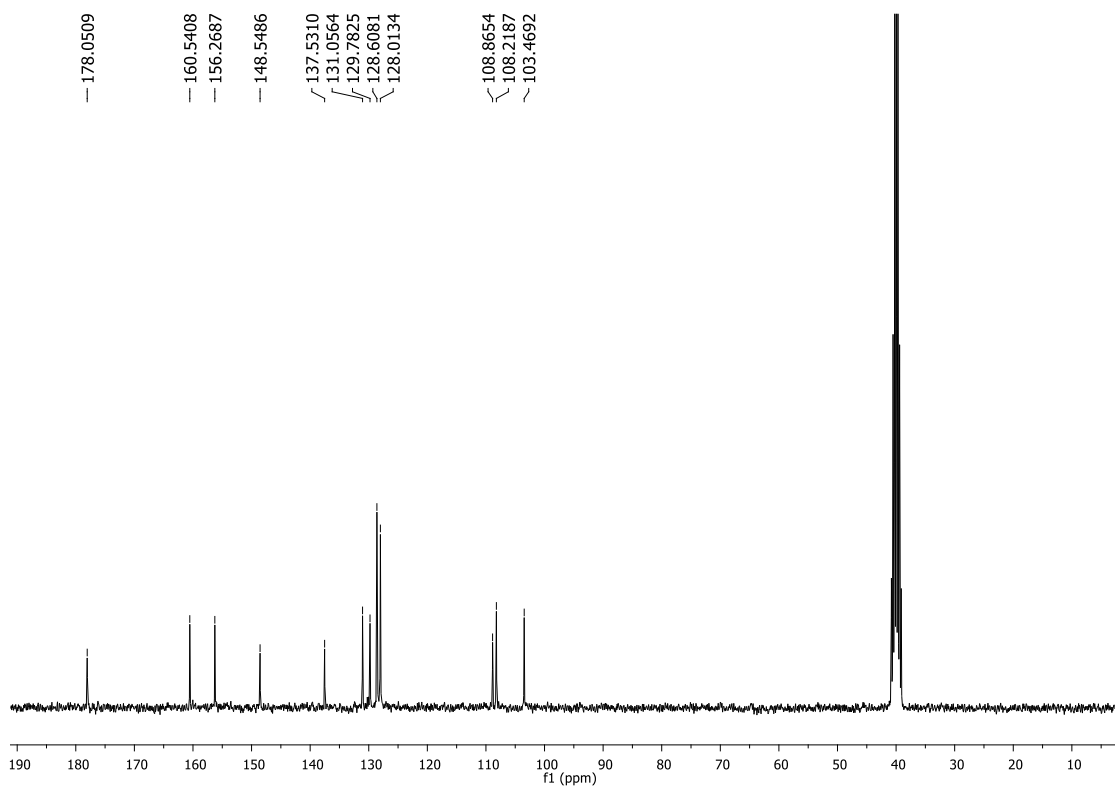

Figure S34:  $^{13}\text{C}$  NMR spectra of **2e** ( $\text{DMSO-}d_6$ , 75 MHz).

80\_JPD-18 #333 RT: 2,03 AV: 1 NL: 6,05E8  
T: FTMS + p ESI Full lock ms [120,00-1200,00]

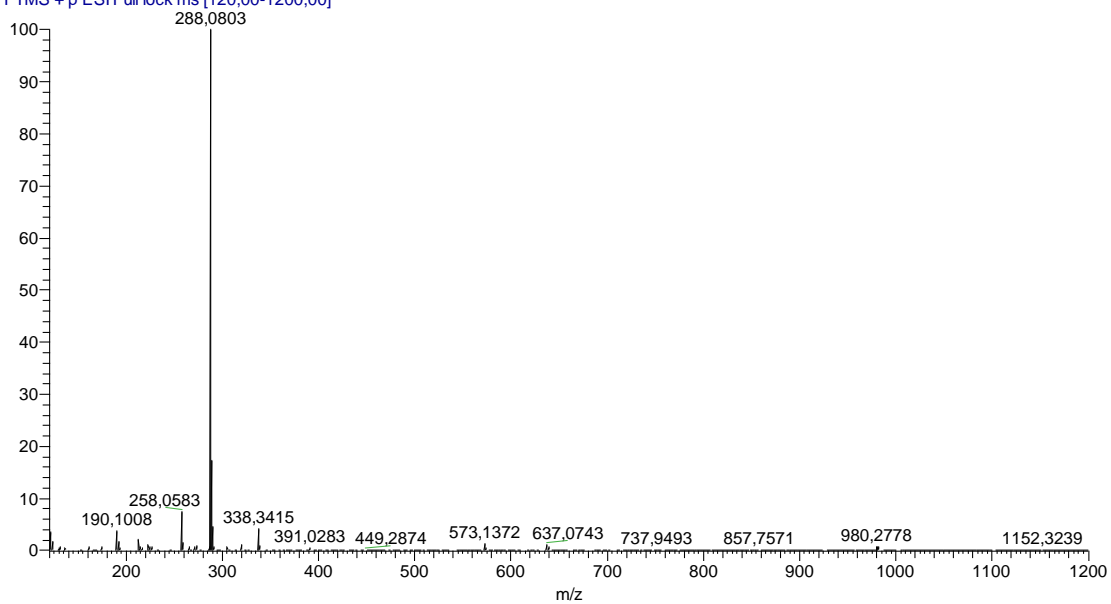

Figure S35: HRMS spectra of 2e.

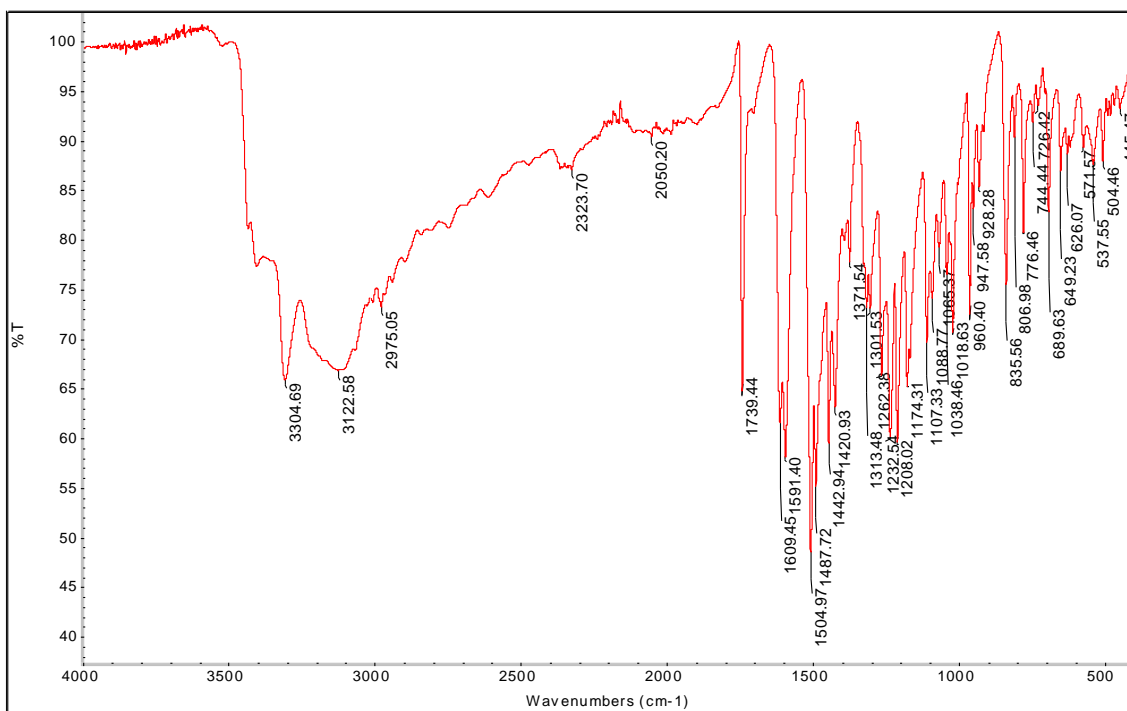

Figure S36: IR spectra of 2f.

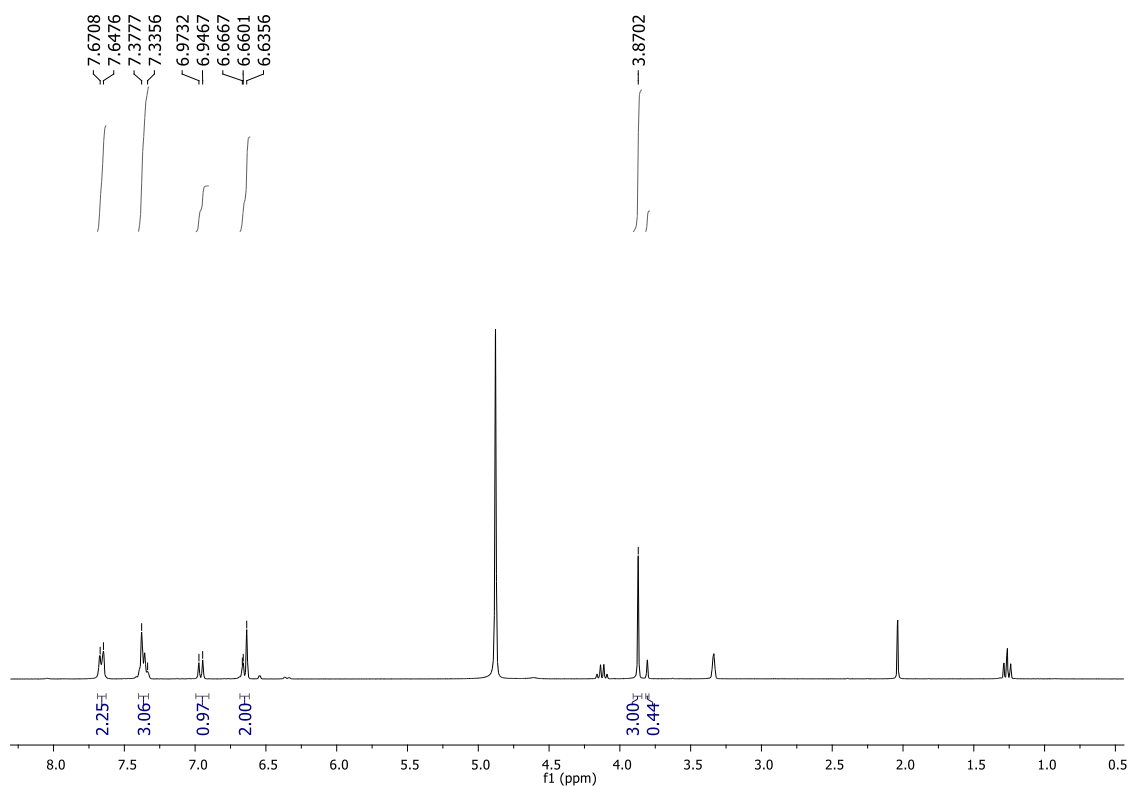

Figure S37:  $^1\text{H}$  NMR spectra of **2f** ( $\text{CD}_3\text{OD}$ , 300 MHz).

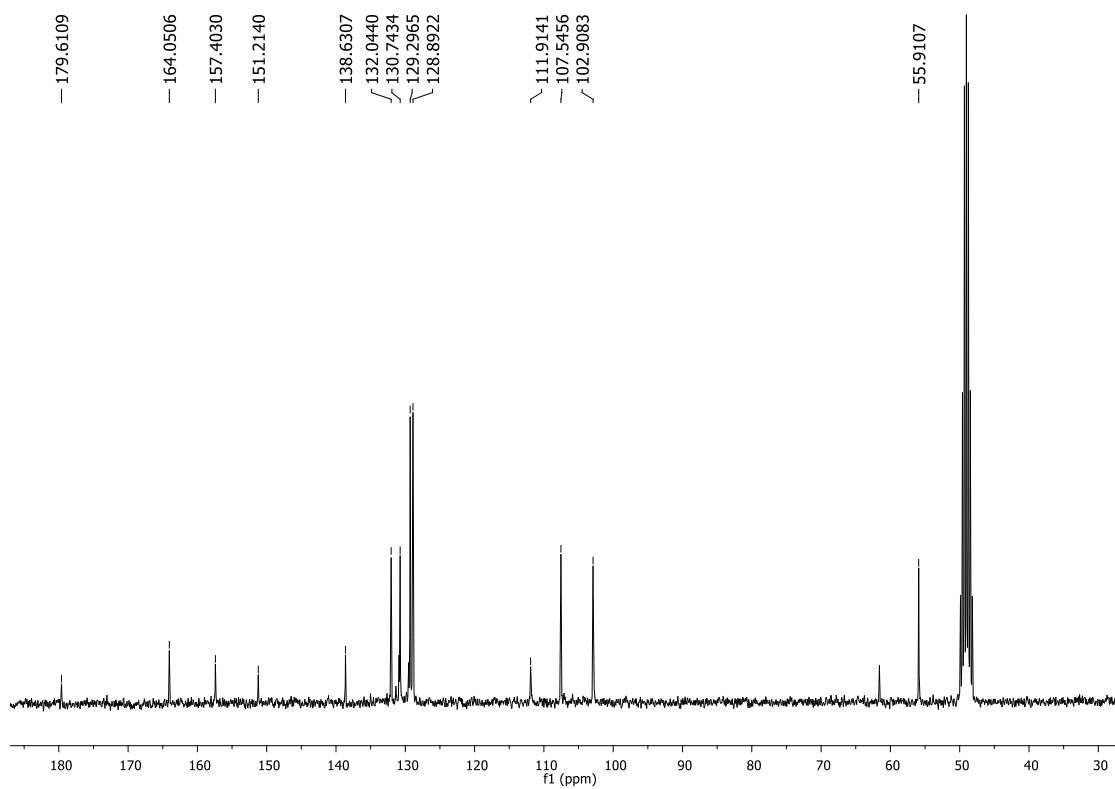

Figure S38:  $^{13}\text{C}$  NMR spectra of **2f** ( $\text{CD}_3\text{OD}$ , 75 MHz).

81\_JPD-19 #349 RT: 2.12 AV: 1 NL: 8.39E8  
T: FTMS + p ESI Full lock ms [120.00-1200.00]

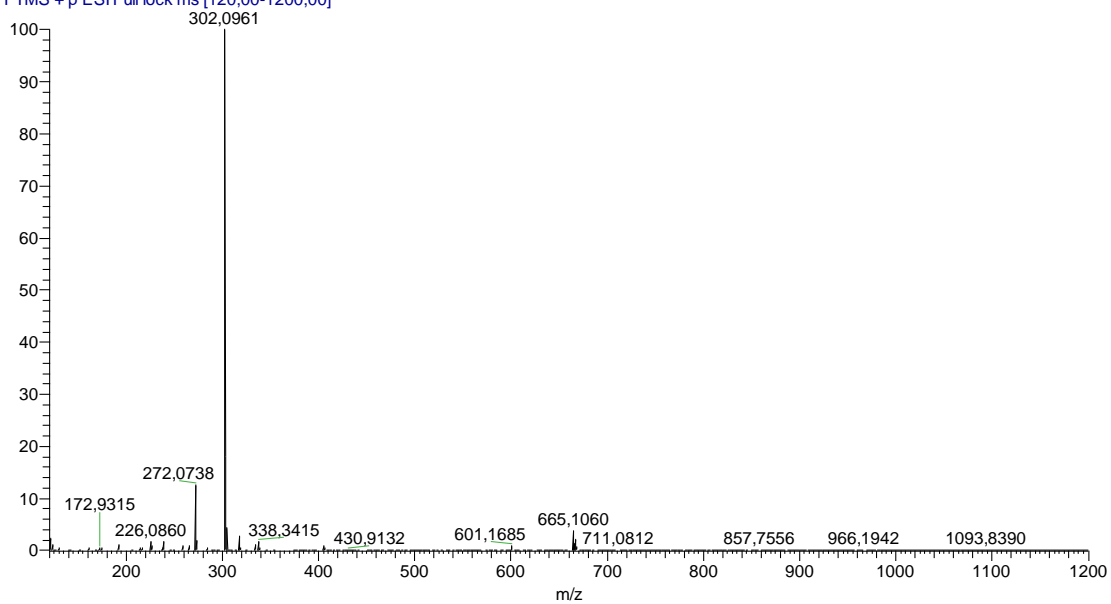

Figure S39: HRMS spectra of 2f.

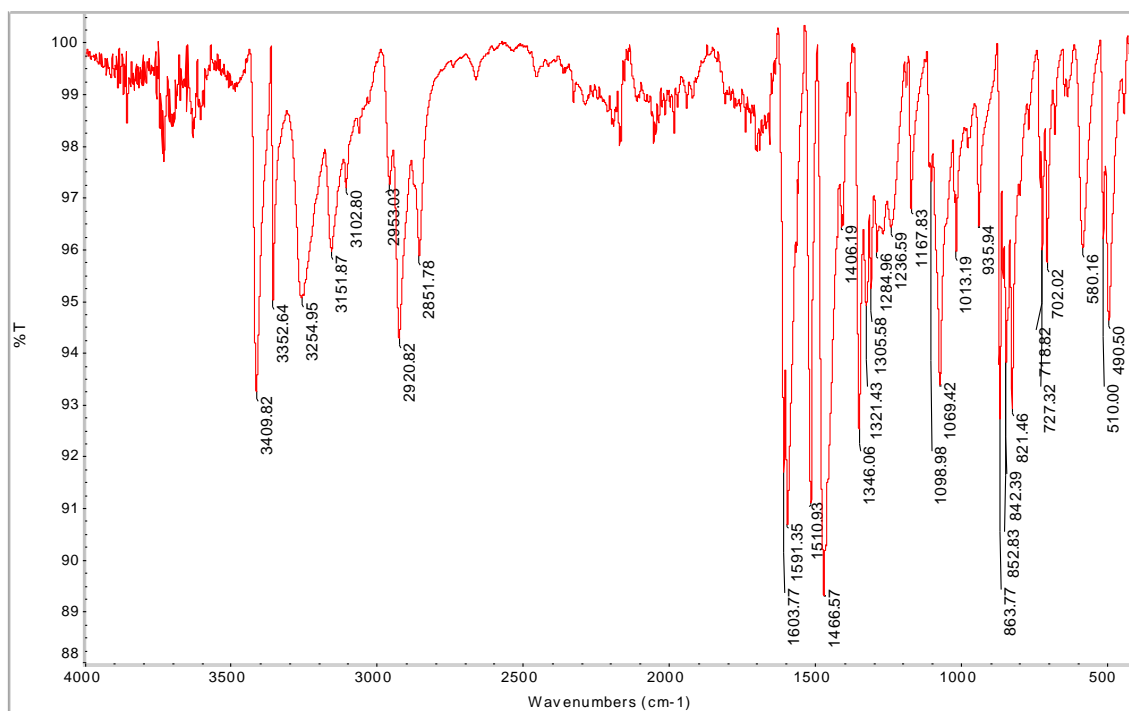

Figure S40: IR spectra of 2g.

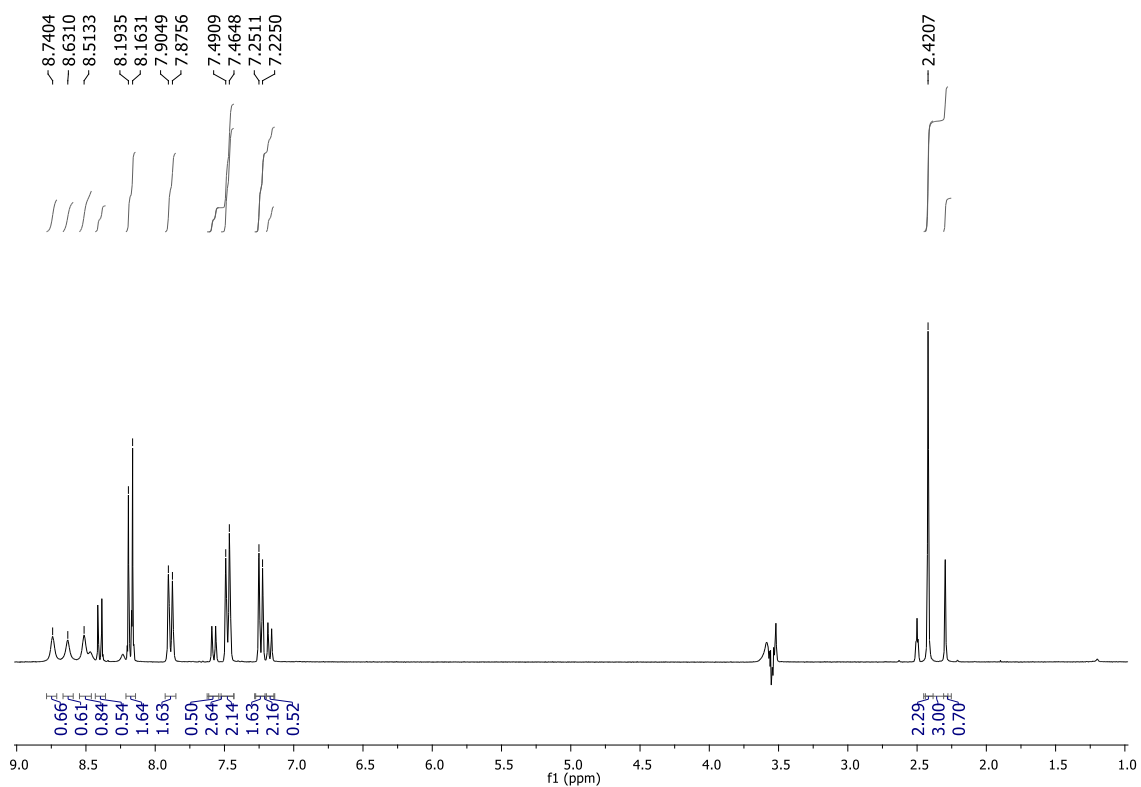

Figure S41:  $^1\text{H}$  NMR spectra of **2g** ( $\text{DMSO-}d_6$ , 300 MHz).

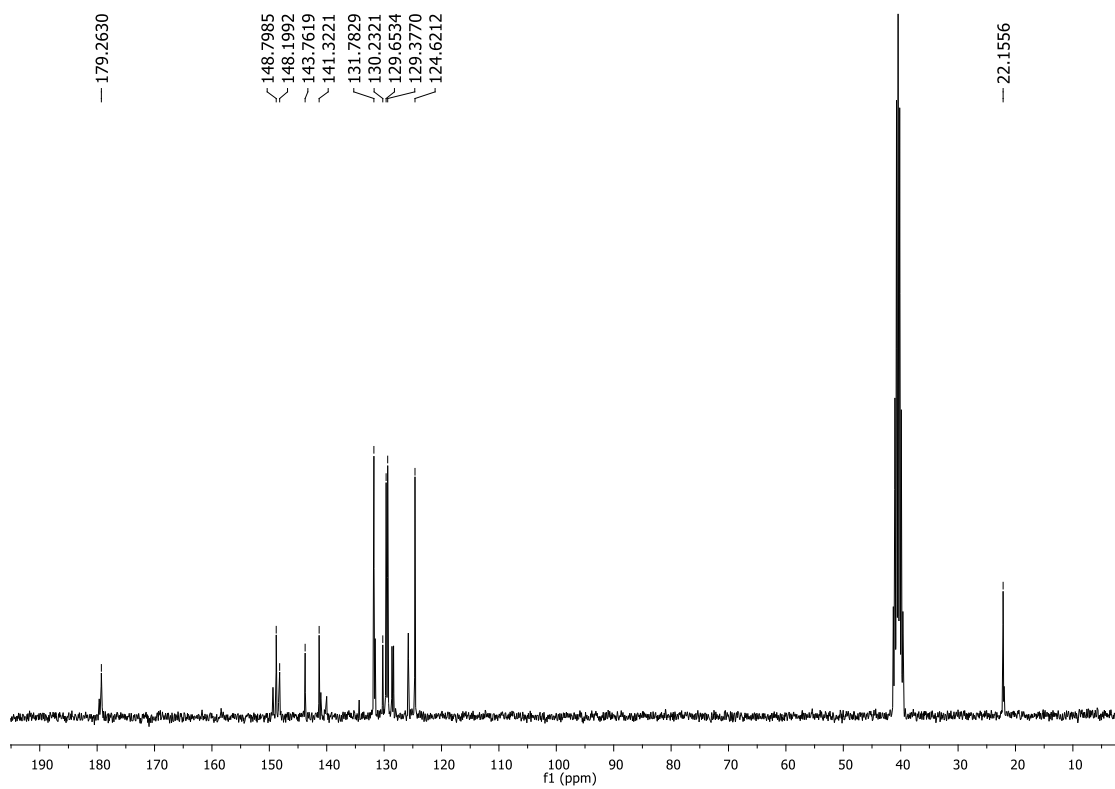

Figure S42:  $^{13}\text{C}$  NMR spectra of **2g** ( $\text{DMSO-}d_6$ , 75 MHz).

88\_JPD-27 #343 RT: 2,09 AV: 1 NL: 7,16E7  
T: FTMS - p ESI Full ms [120,00-1200,00]

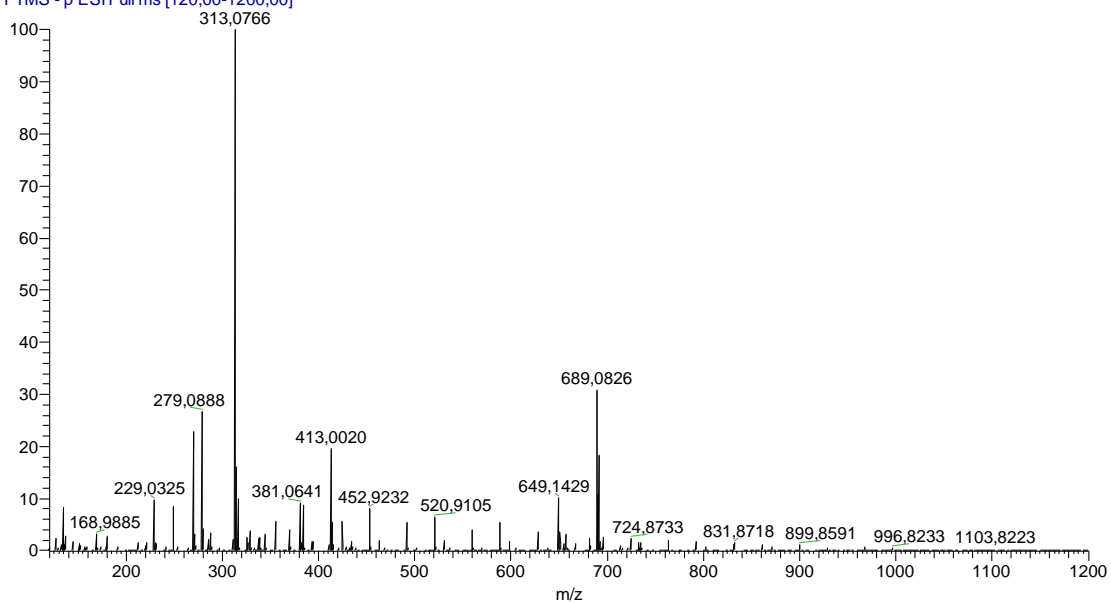

Figure S43: HRMS spectra of 2g.

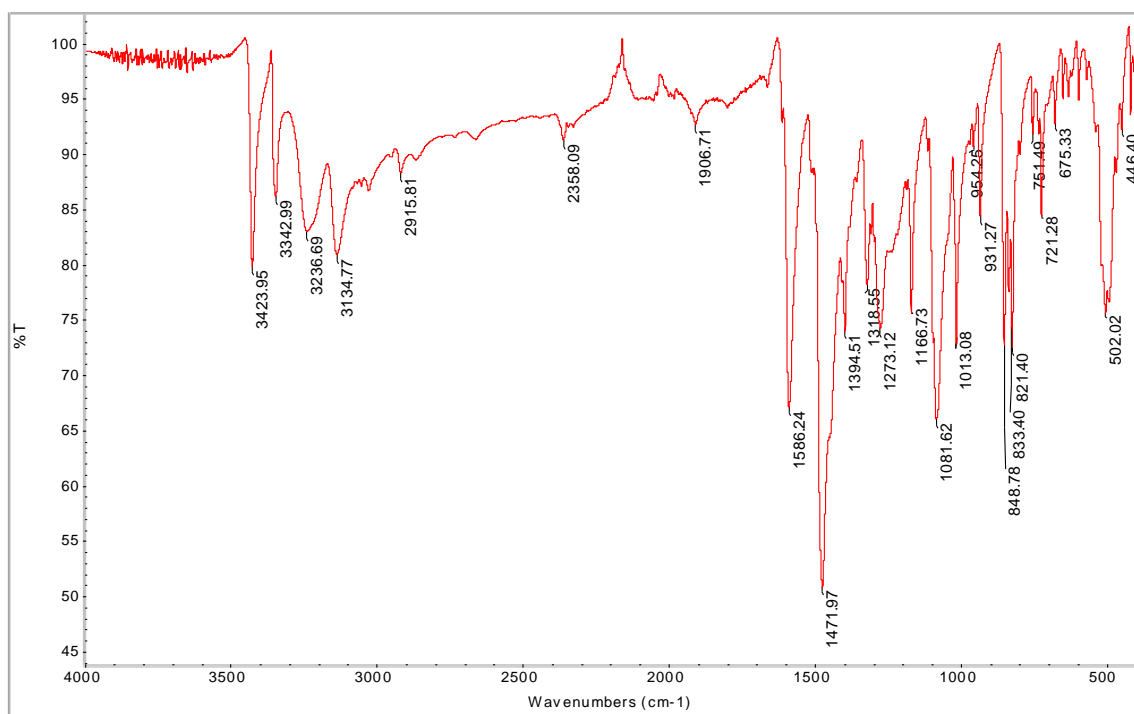

Figure S44: IR spectra of 2h.

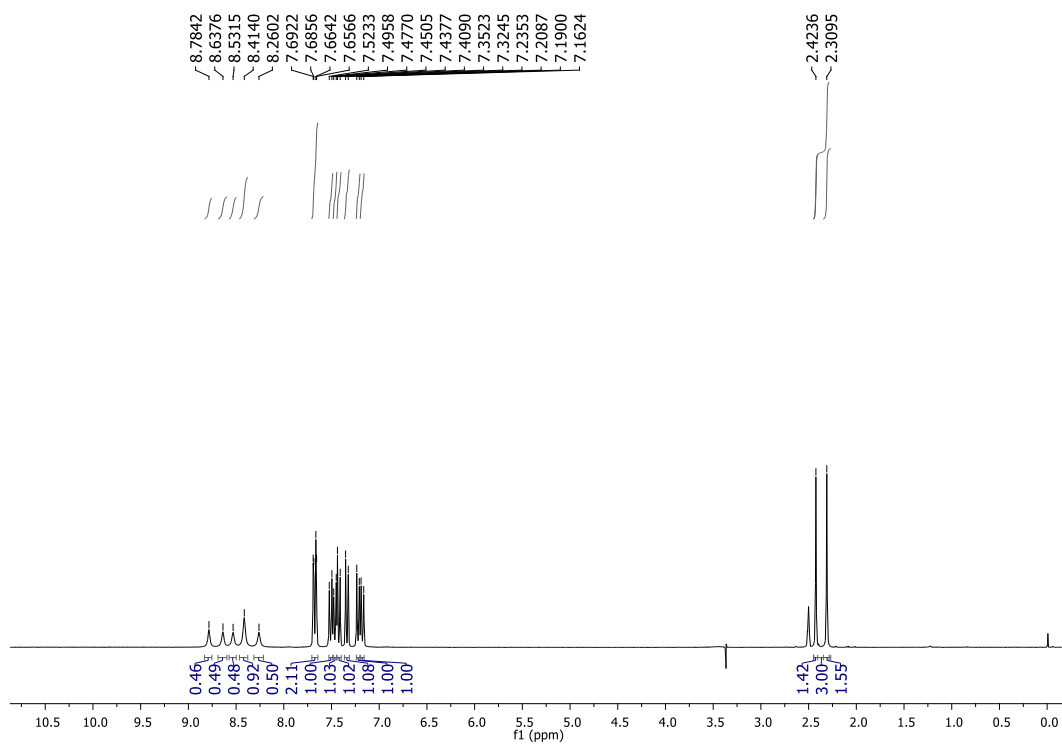

Figure S45:  $^1\text{H}$  NMR spectra of **2h** ( $\text{DMSO-}d_6$ , 300 MHz).

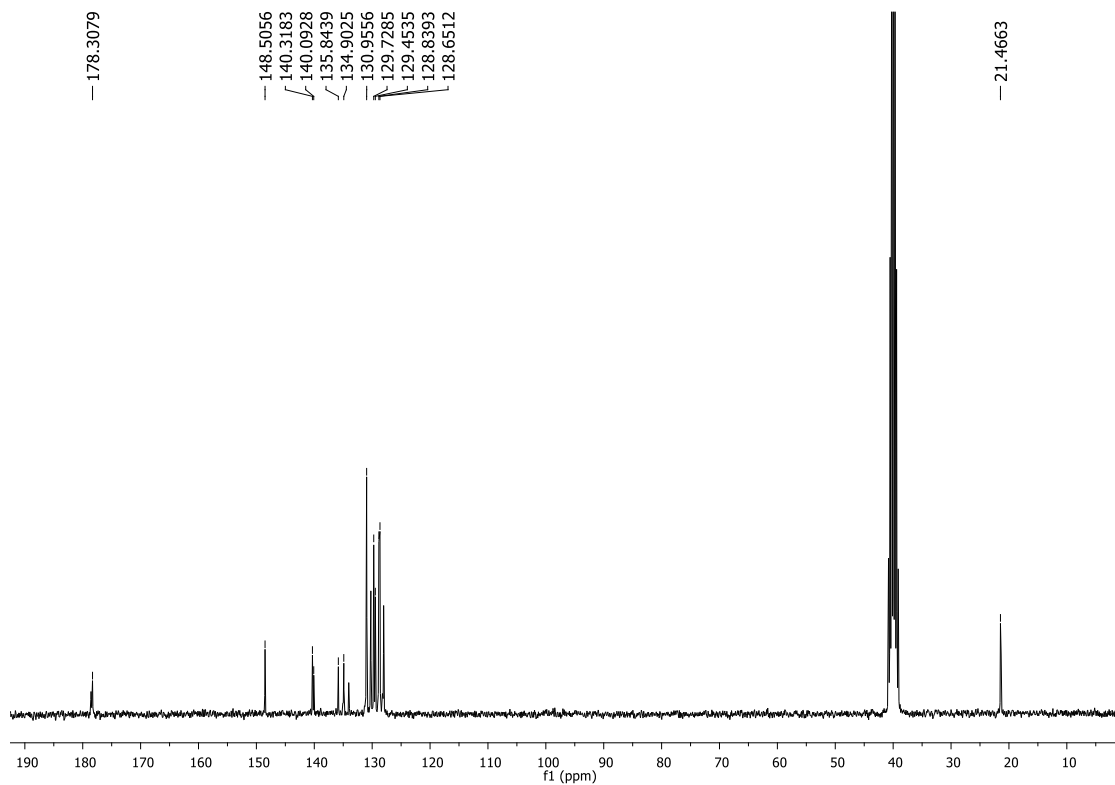

Figure S46:  $^{13}\text{C}$  NMR spectra of **2h** ( $\text{DMSO-}d_6$ , 75 MHz).



92\_JPD-44 #369 RT: 2,25 AV: 1 NL: 1,94E8  
T: FTMS + p ESI Full lock ms [120,00-1200,00]

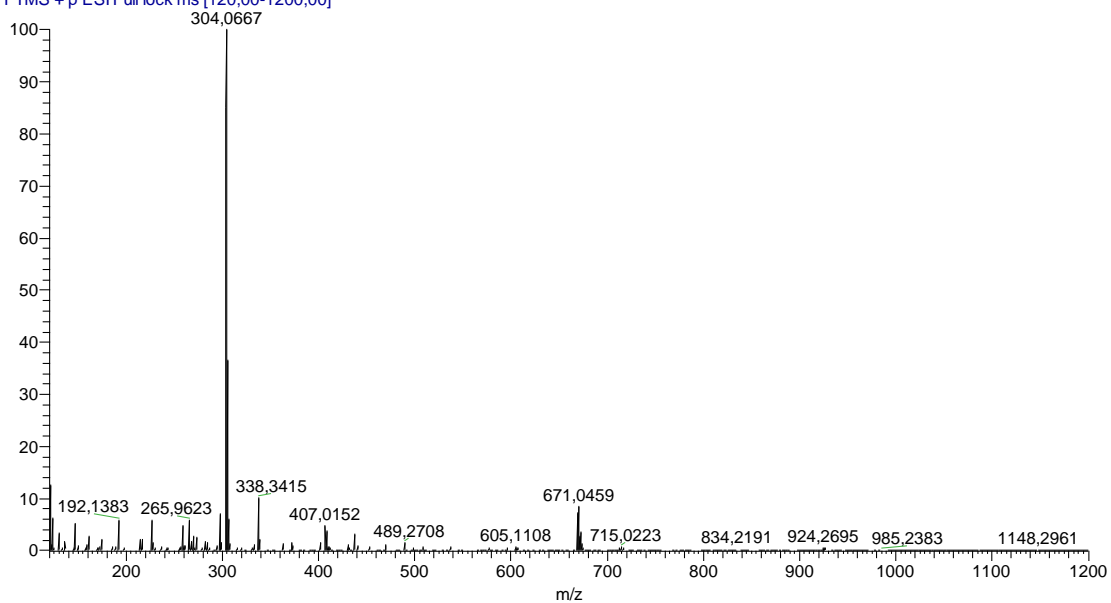

Figure S47: HRMS spectra of 2h.

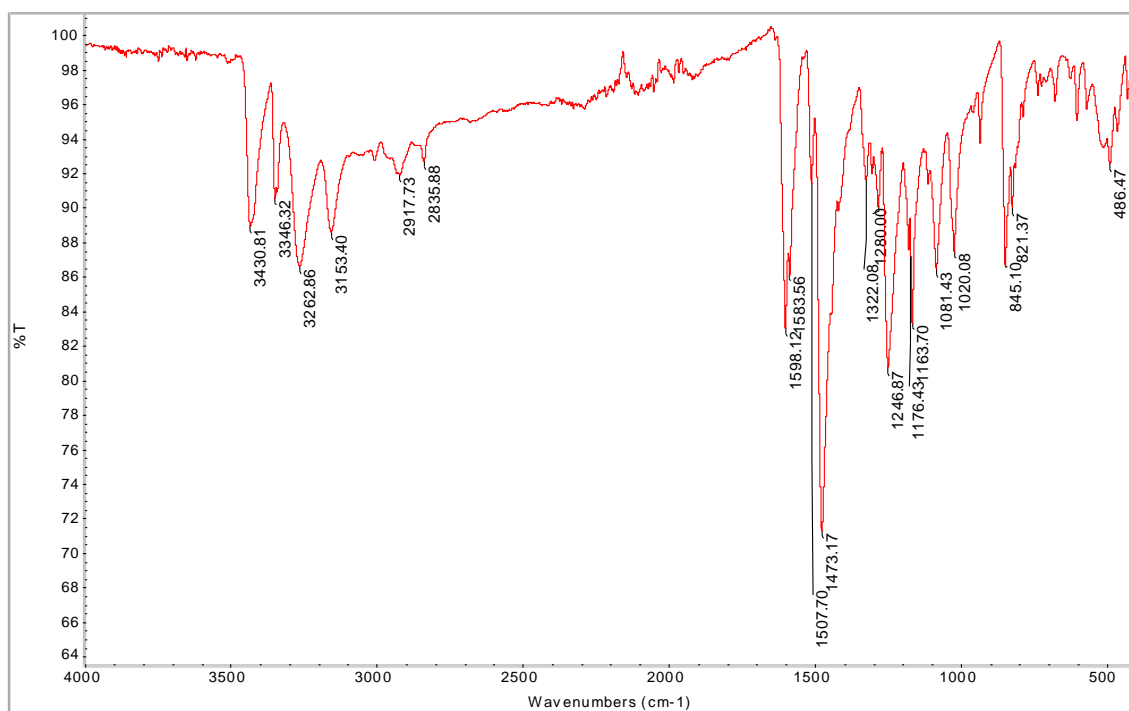

Figure S48: IR spectra of 2i.

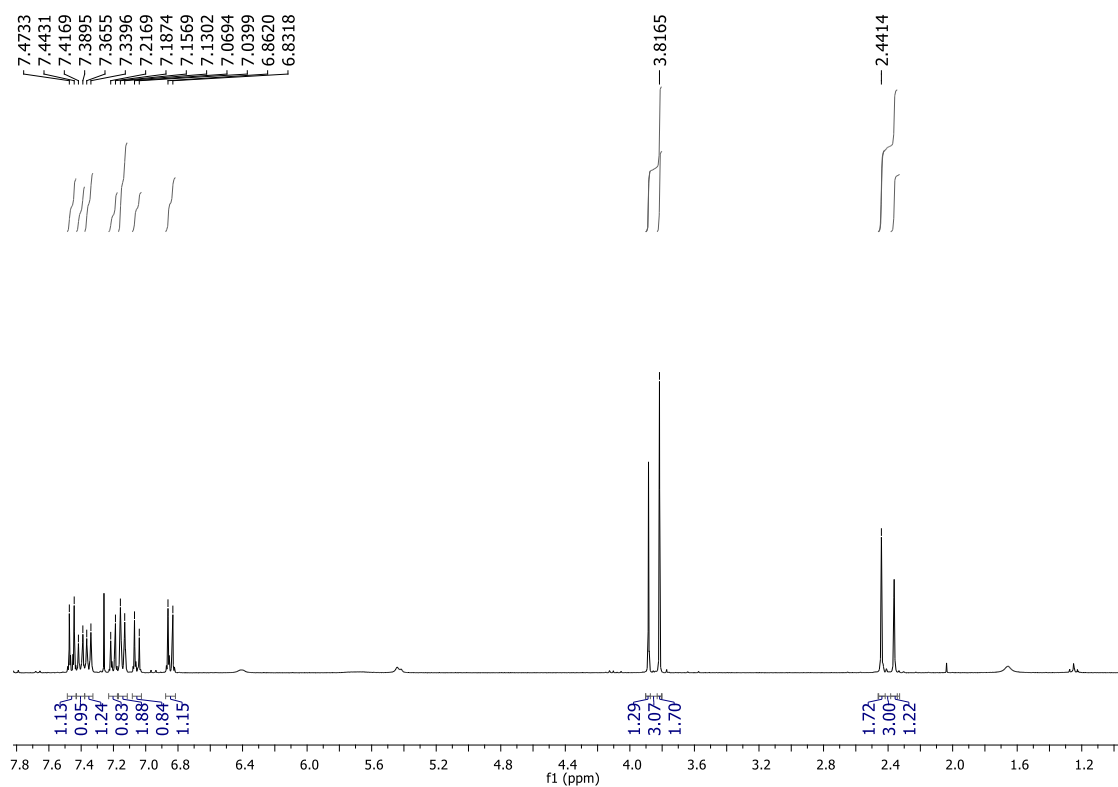

Figure S49:  $^1\text{H}$  NMR spectra of **2i** ( $\text{CDCl}_3$ , 300 MHz).

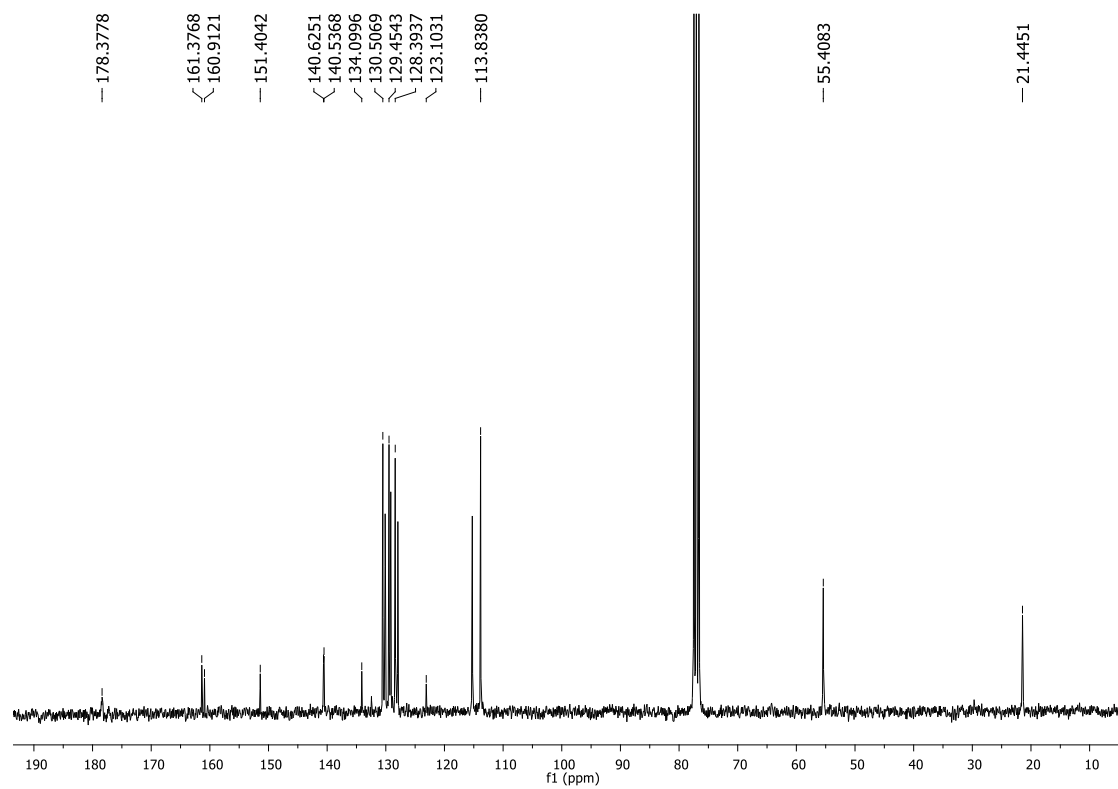

Figure S50:  $^{13}\text{C}$  NMR spectra of **2i** ( $\text{CDCl}_3$ , 75 MHz).

96\_JPD-55 #365 RT: 2,22 AV: 1 NL: 1,63E9  
T: FTMS + p ESI Full lock ms [120,00-1200,00]

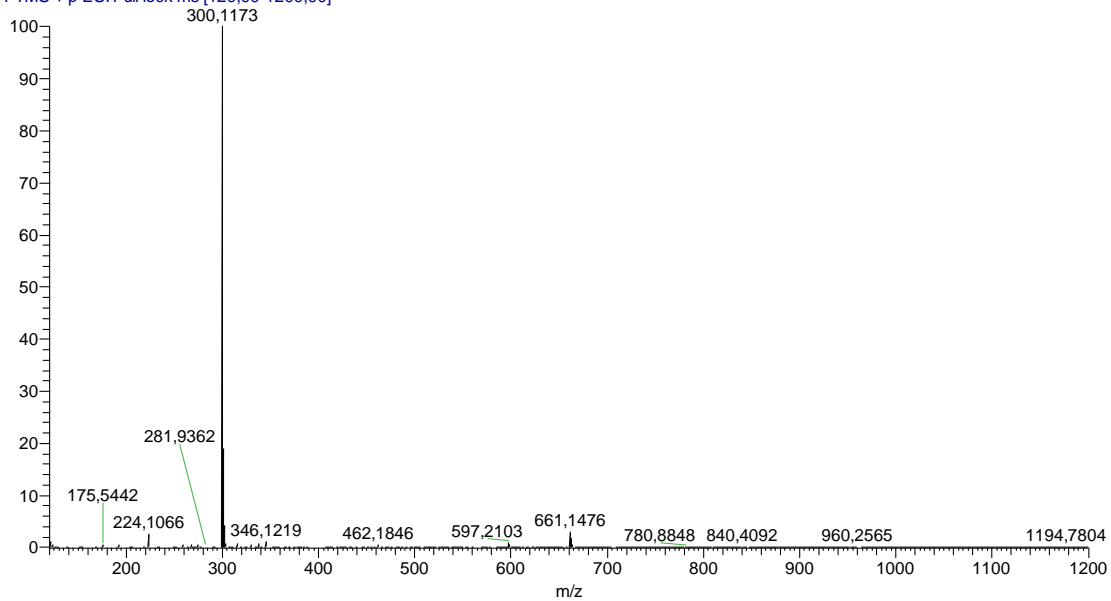

Figure S51: HRMS spectra of 2i.

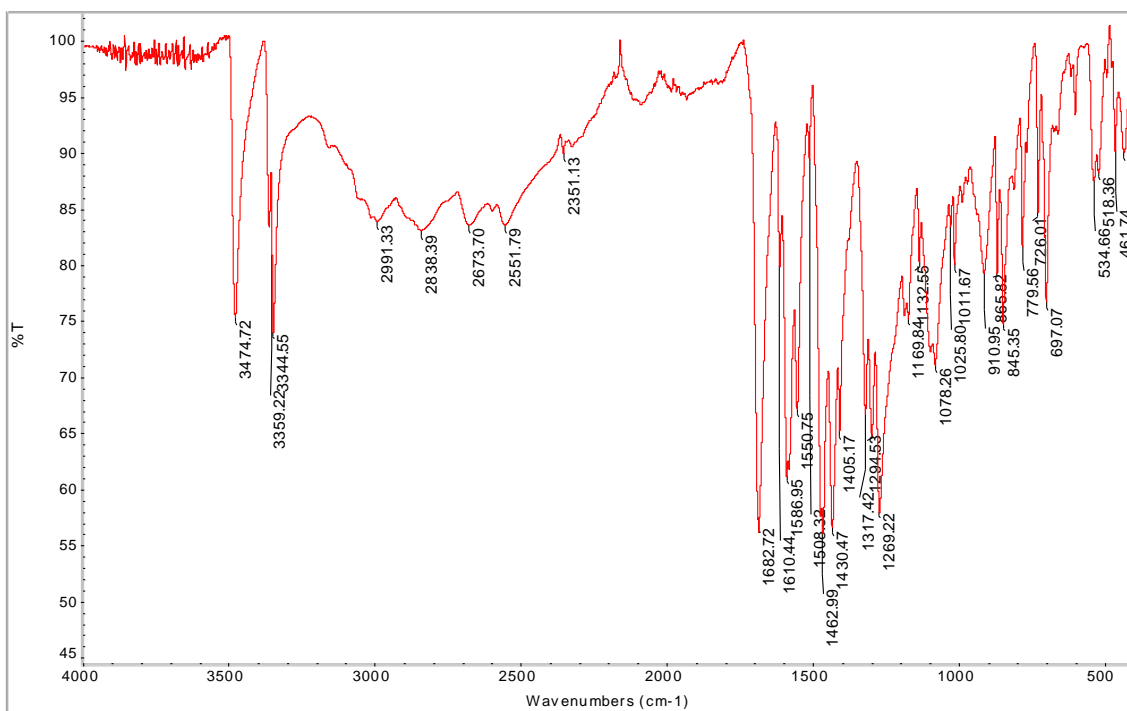

Figure S52: IR spectra of 2j.

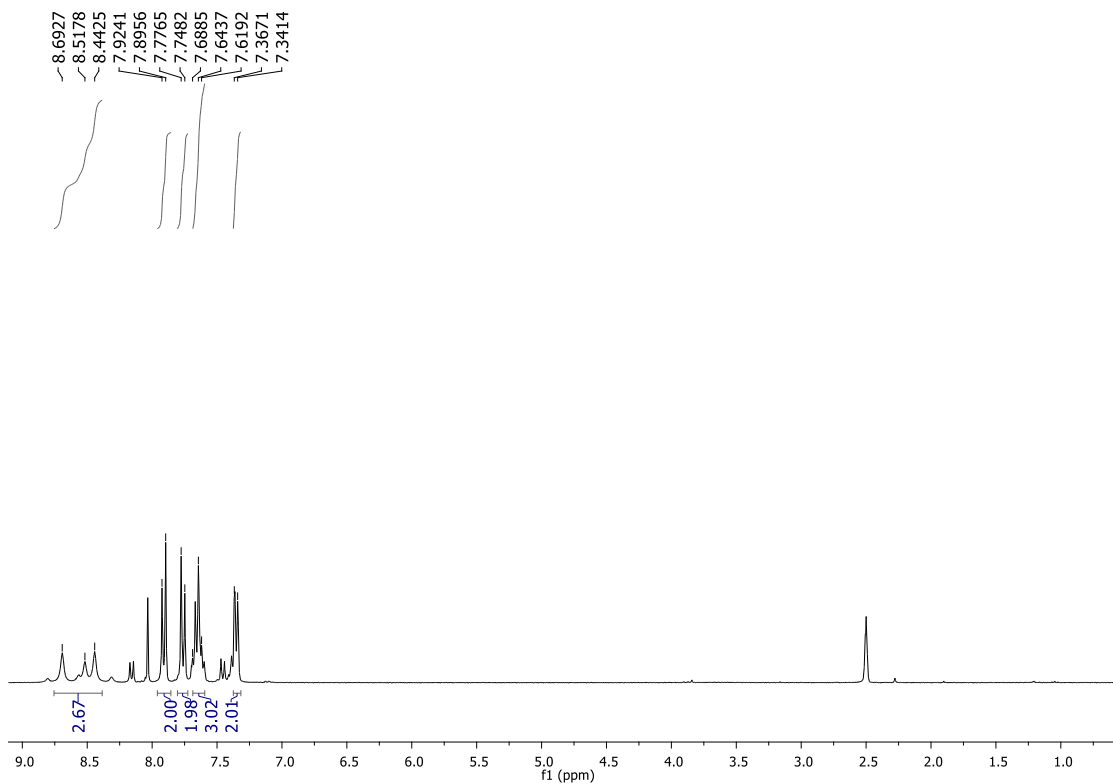

Figure S53:  $^1\text{H}$  NMR spectra of **2j** ( $\text{DMSO-}d_6$ , 300 MHz).

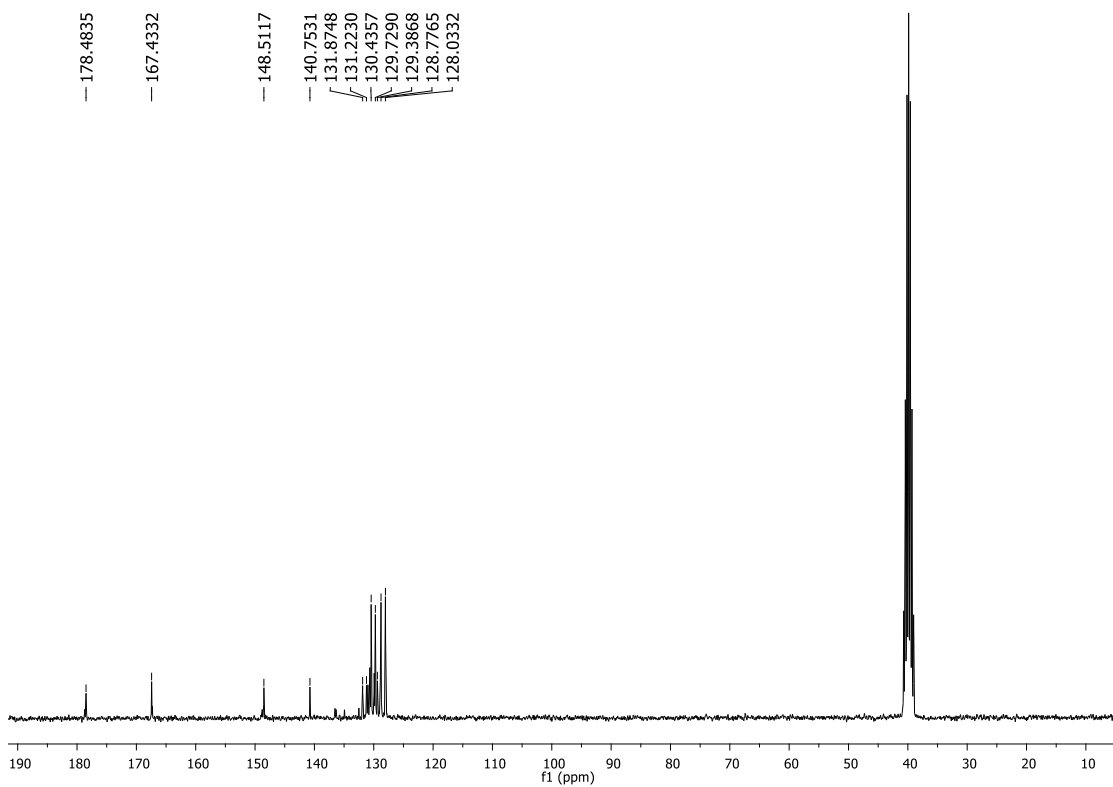

Figure S54:  $^{13}\text{C}$  NMR spectra of **2j** ( $\text{DMSO-}d_6$ , 75 MHz).

93\_JPD-45 #329 RT: 2.00 AV: 1 NL: 9.44E7  
T: FTMS + p ESI Full lock ms [120,00-1200,00]

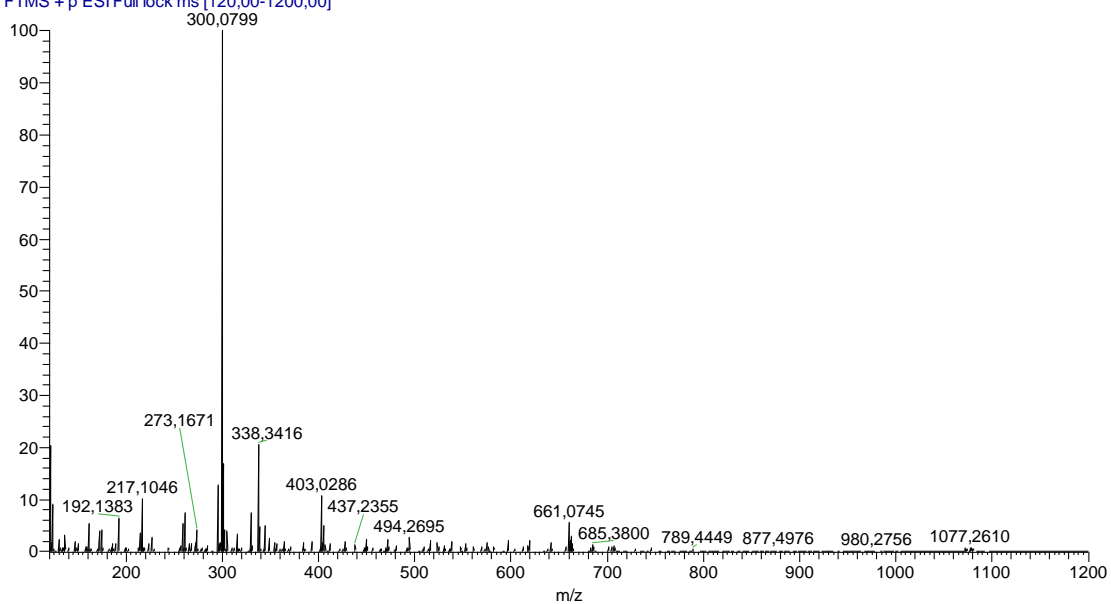

Figure S55: HRMS spectra of **2j**.

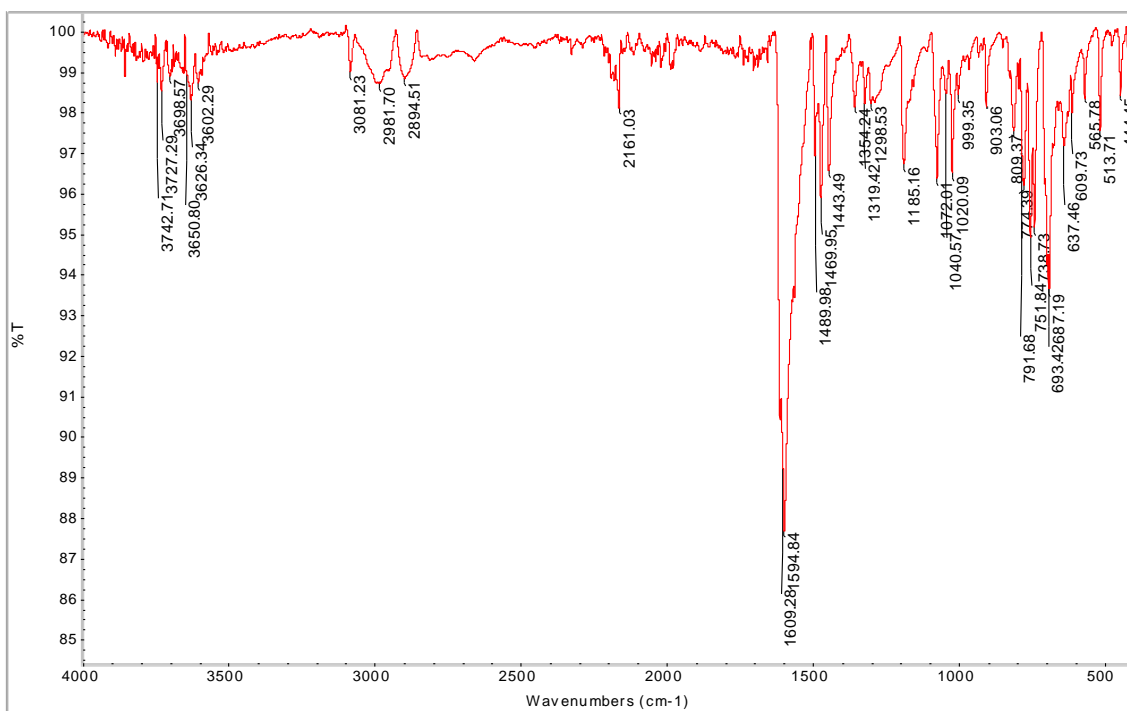

Figure S56: IR spectra of 3a.

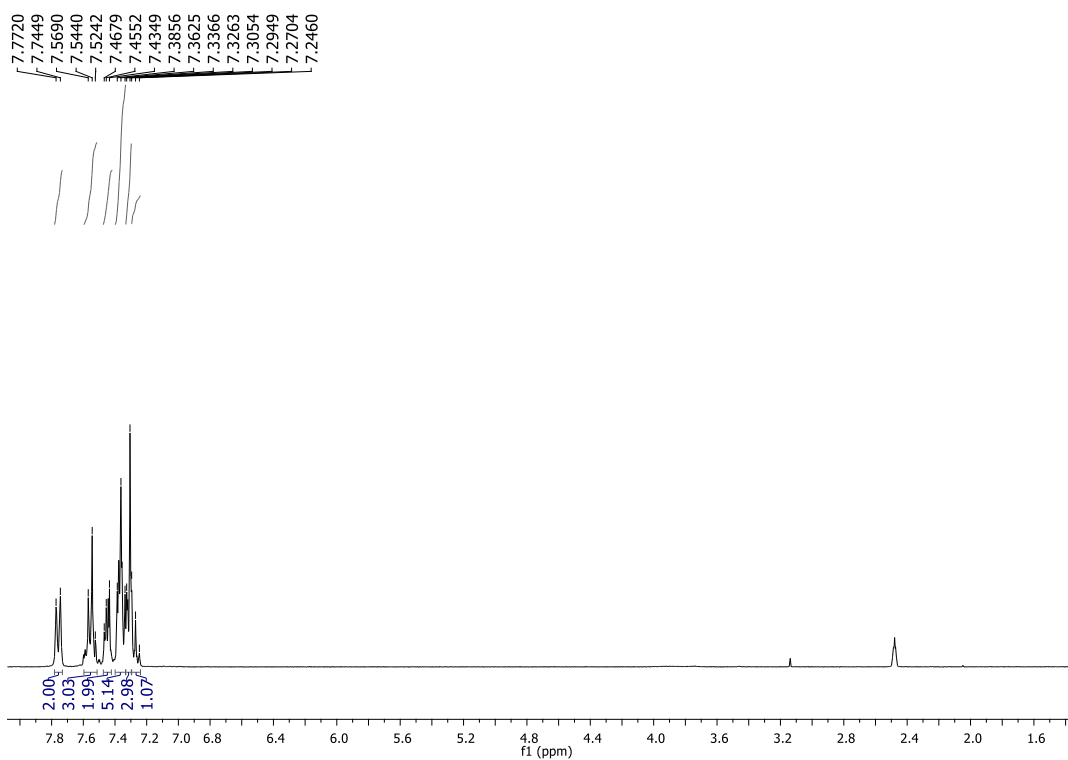

Figure S57: <sup>1</sup>H NMR spectra of 3a (DMSO-*d*<sub>6</sub>, 300 MHz).

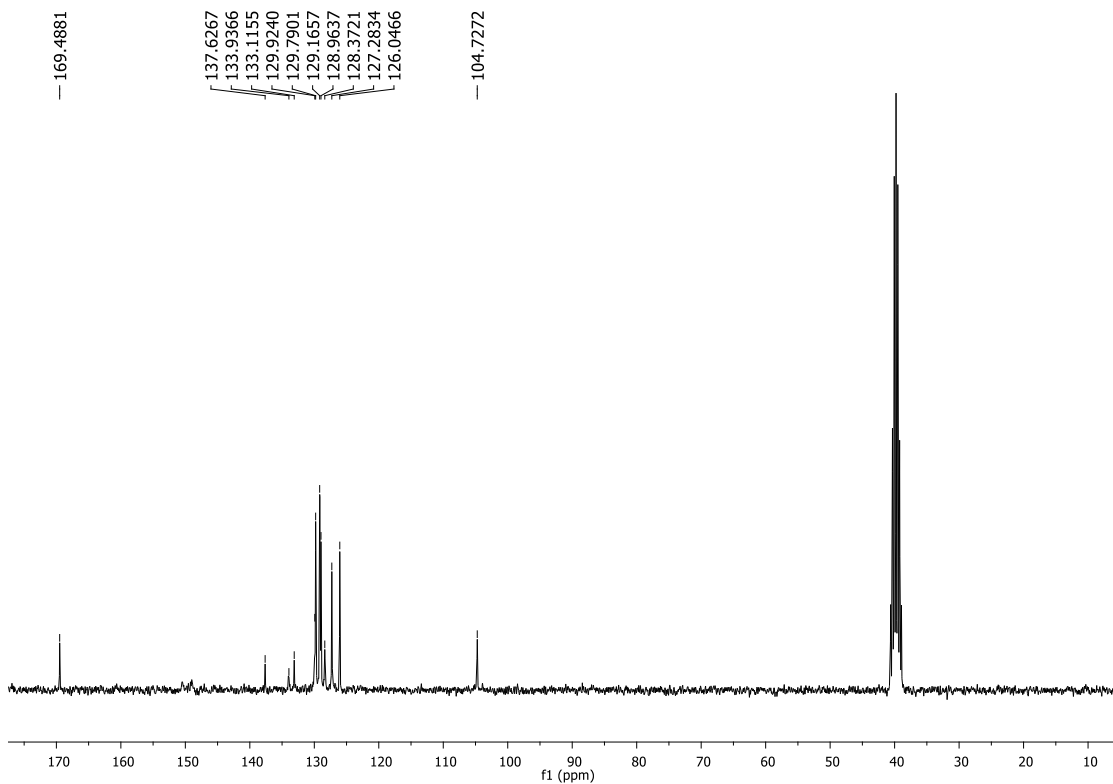

Figure S58:  $^{13}\text{C}$  NMR spectra of **3a** ( $\text{DMSO-}d_6$ , 75 MHz).

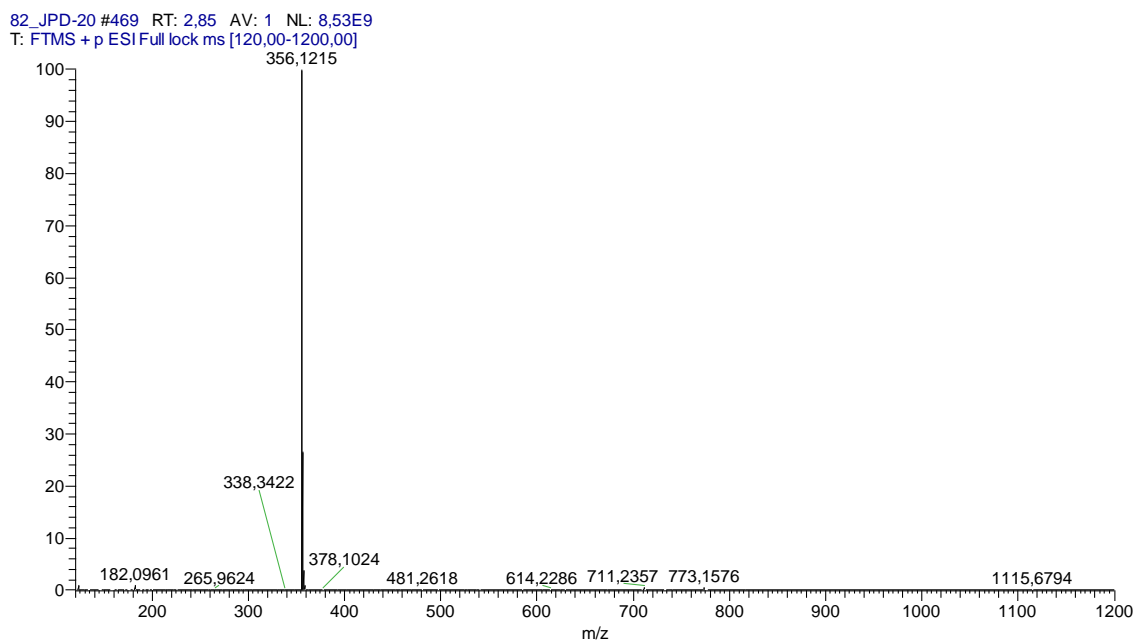

Figure S59: HRMS spectra of **3a**.

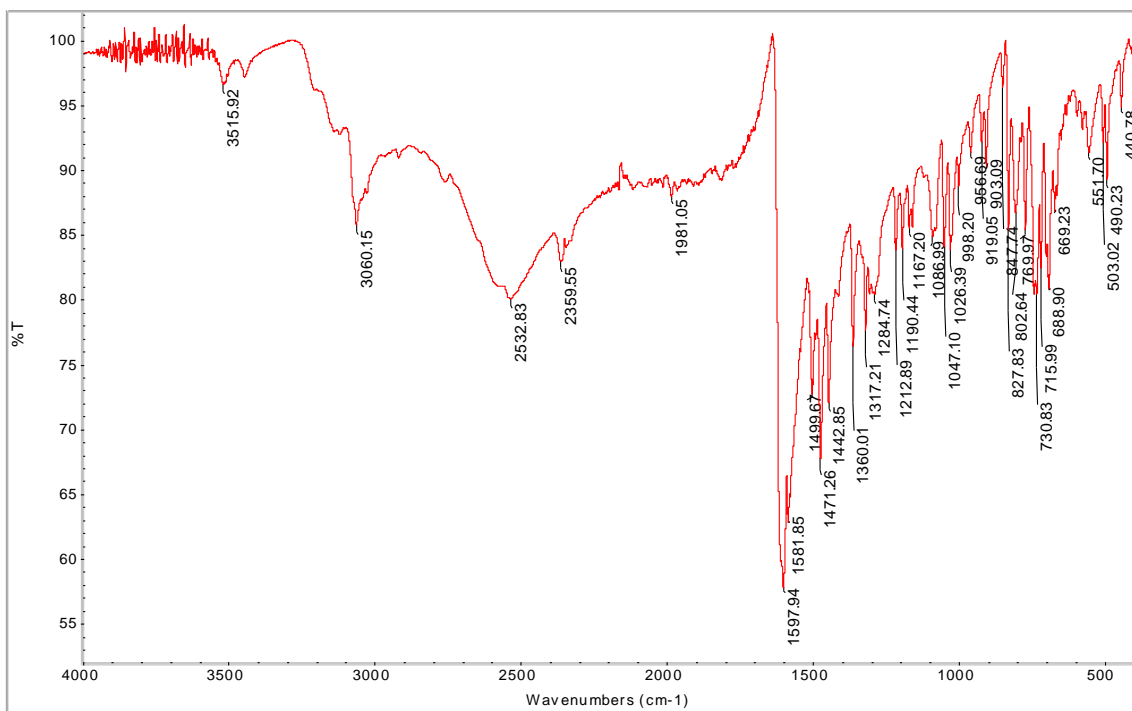

Figure S60: IR spectra of 3b.

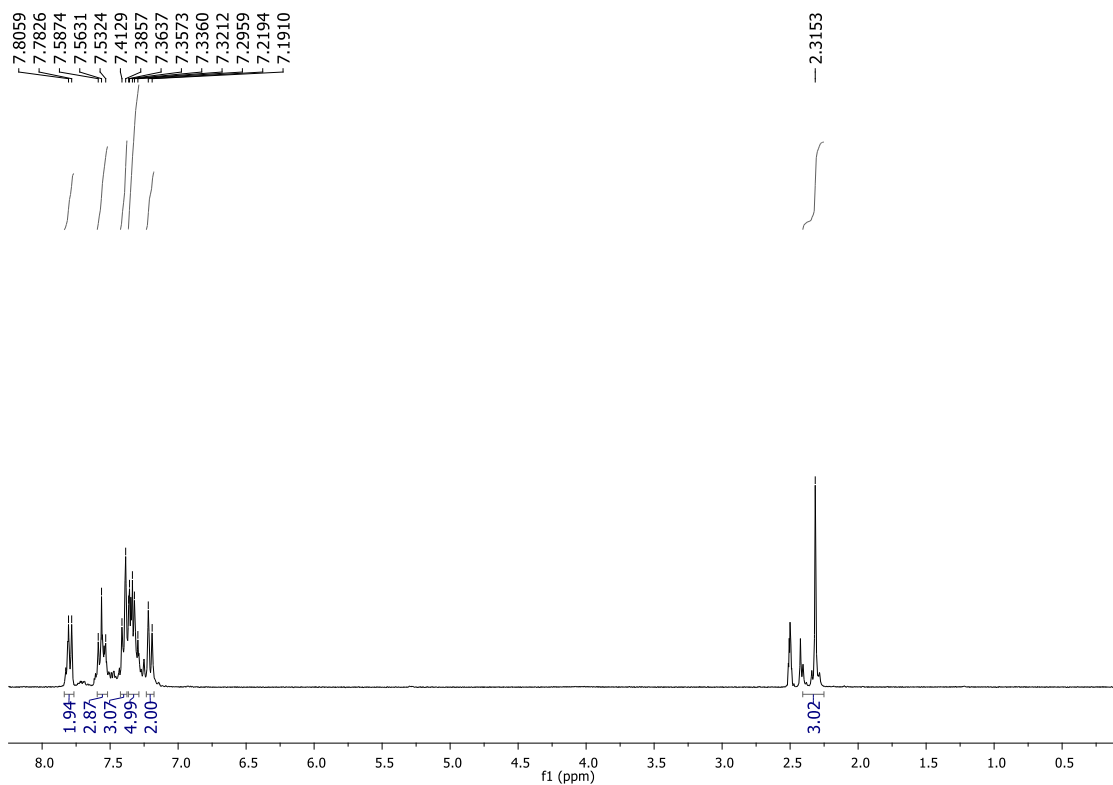

Figure S61: <sup>1</sup>H NMR spectra of 3b (DMSO-*d*<sub>6</sub>, 300 MHz).



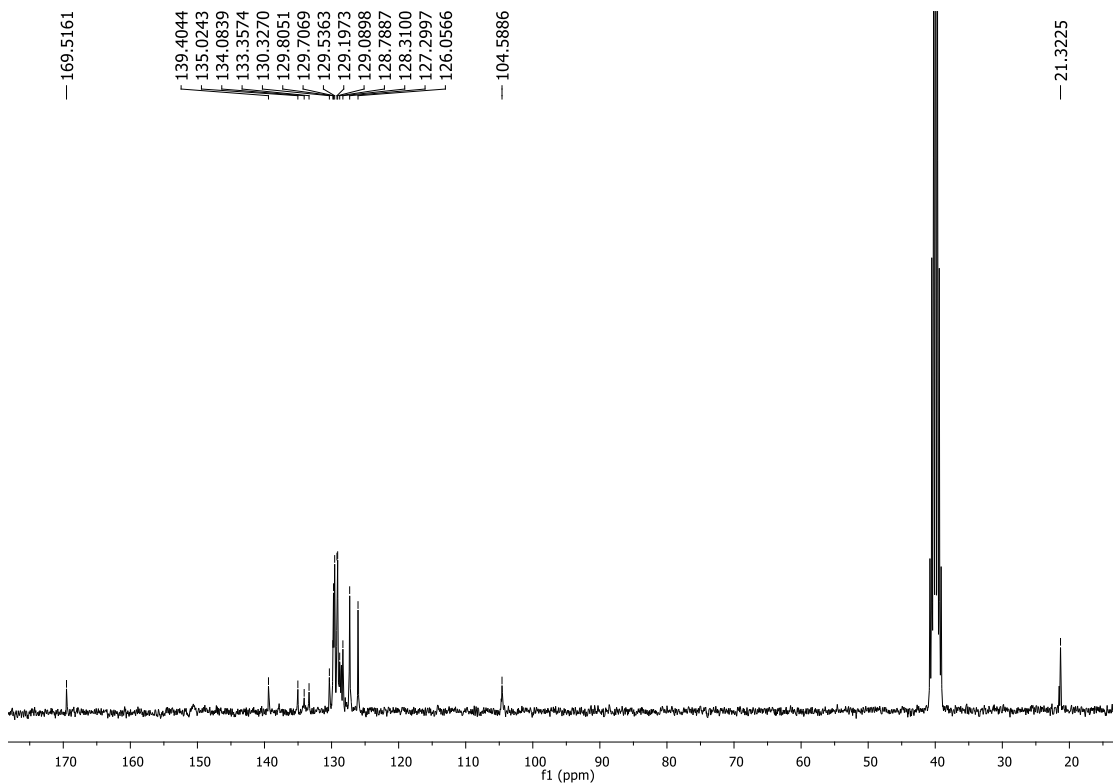

Figure S62:  $^{13}\text{C}$  NMR spectra of **3b** ( $\text{DMSO-}d_6$ , 75 MHz).

83\_JPD-21 #485 RT: 2.95 AV: 1 NL: 5.40E7  
T: FTMS + p ESI Full lock ms [120,00-1200,00]

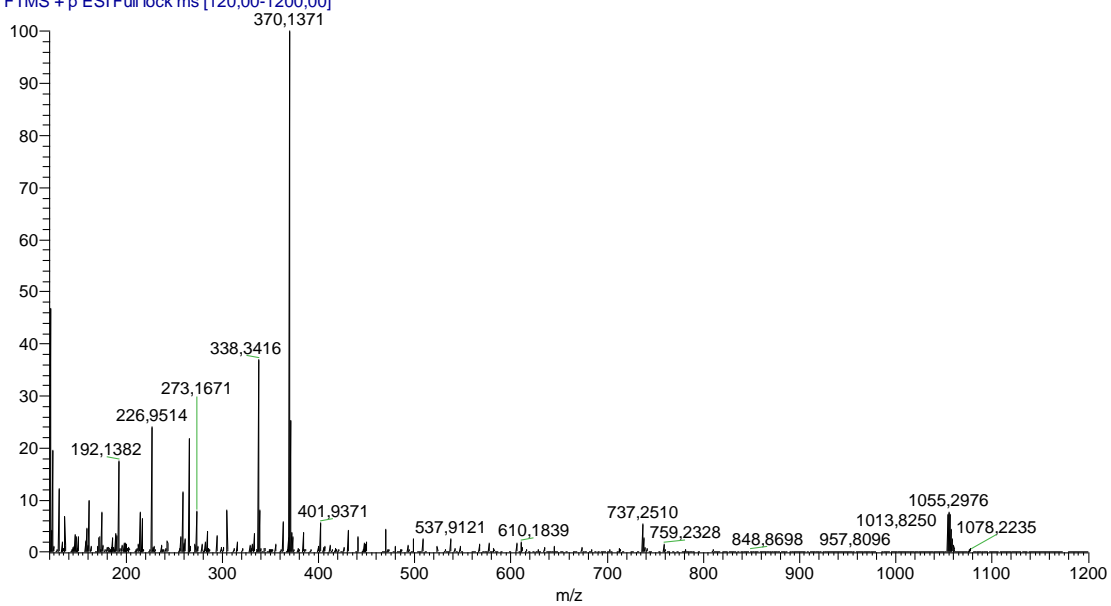

Figure S63: HRMS spectra of **3b**.

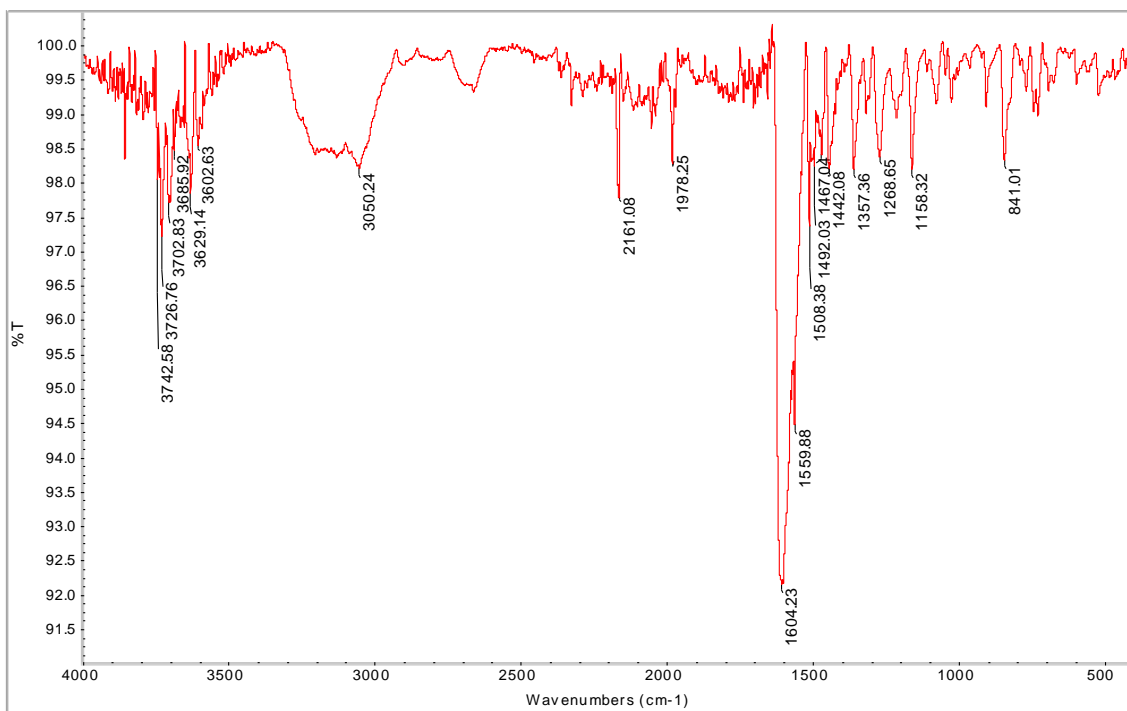

Figure S64: IR spectra of 3c.

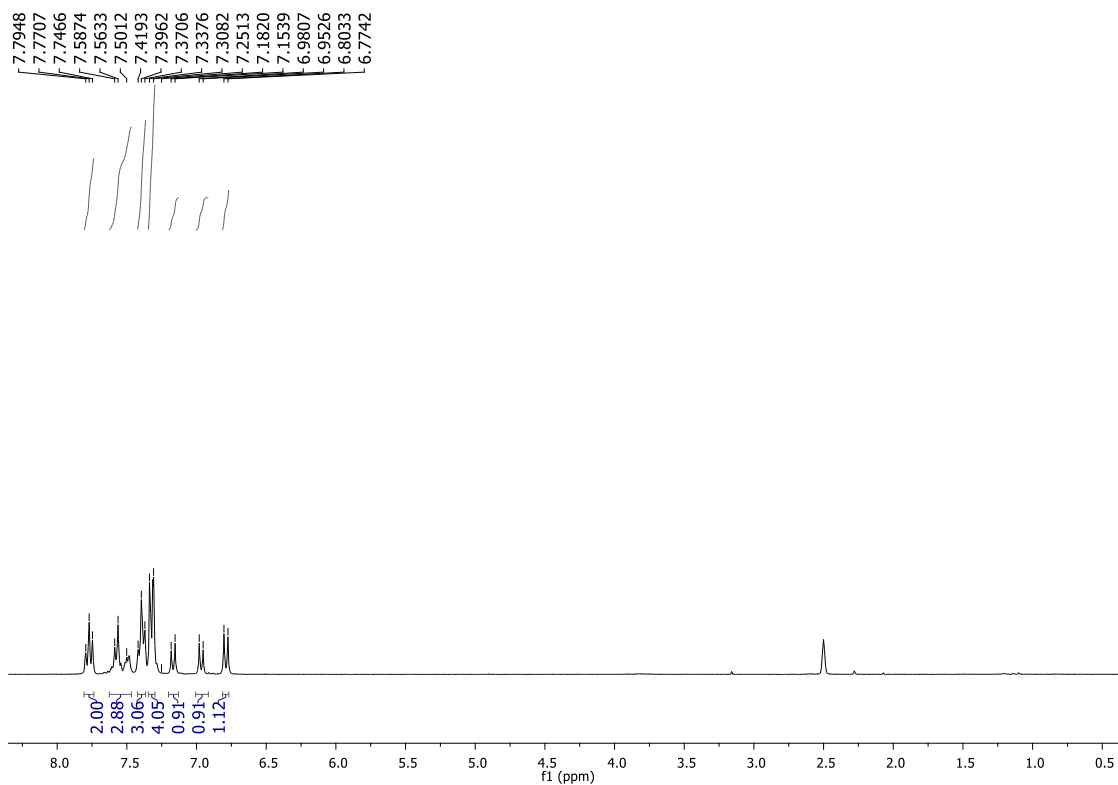

Figure S65: <sup>1</sup>H NMR spectra of 3c (DMSO-*d*<sub>6</sub>, 300 MHz).

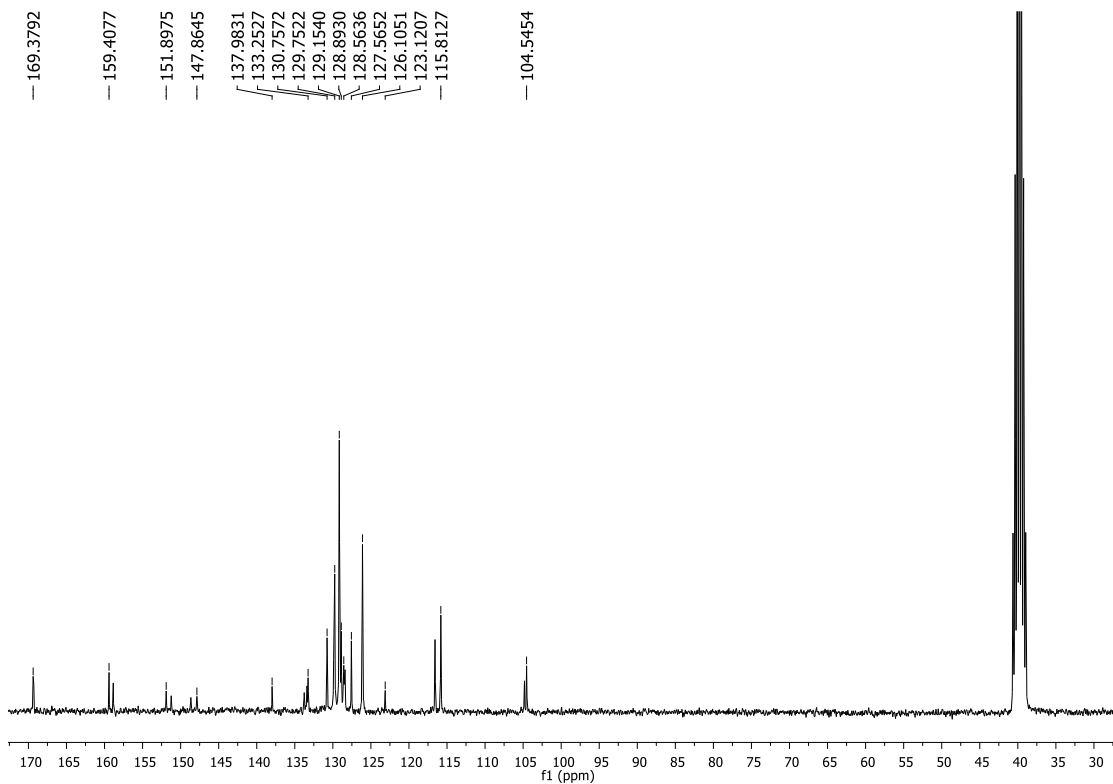

Figure S66:  $^{13}\text{C}$  NMR spectra of **3c** ( $\text{DMSO-}d_6$ , 75 MHz).

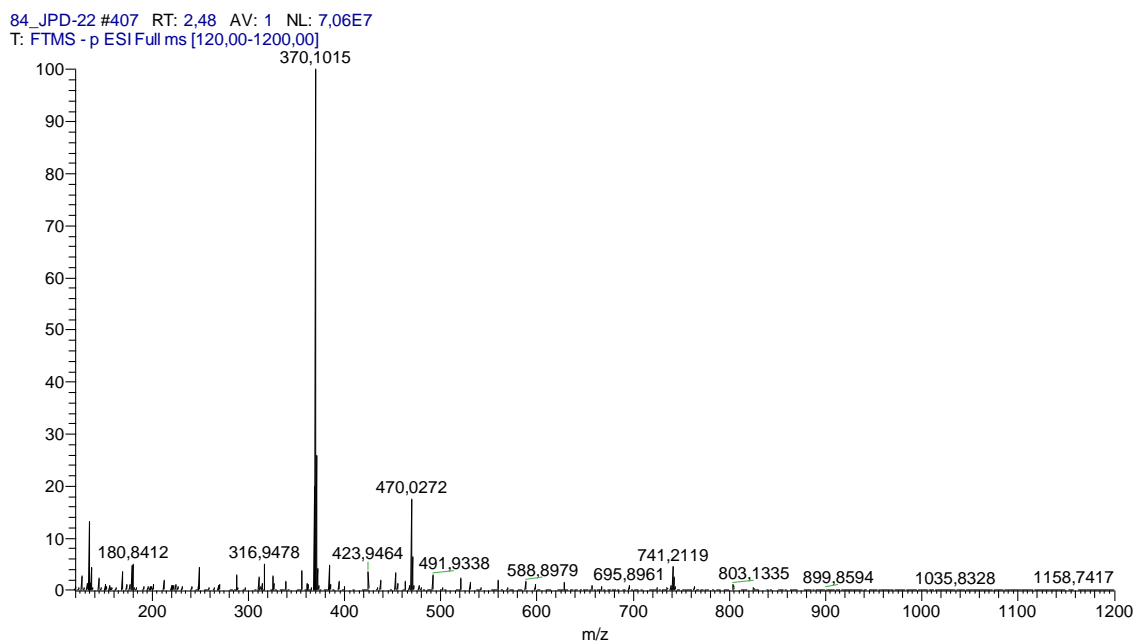

Figure S67: HRMS spectra of **3c**.

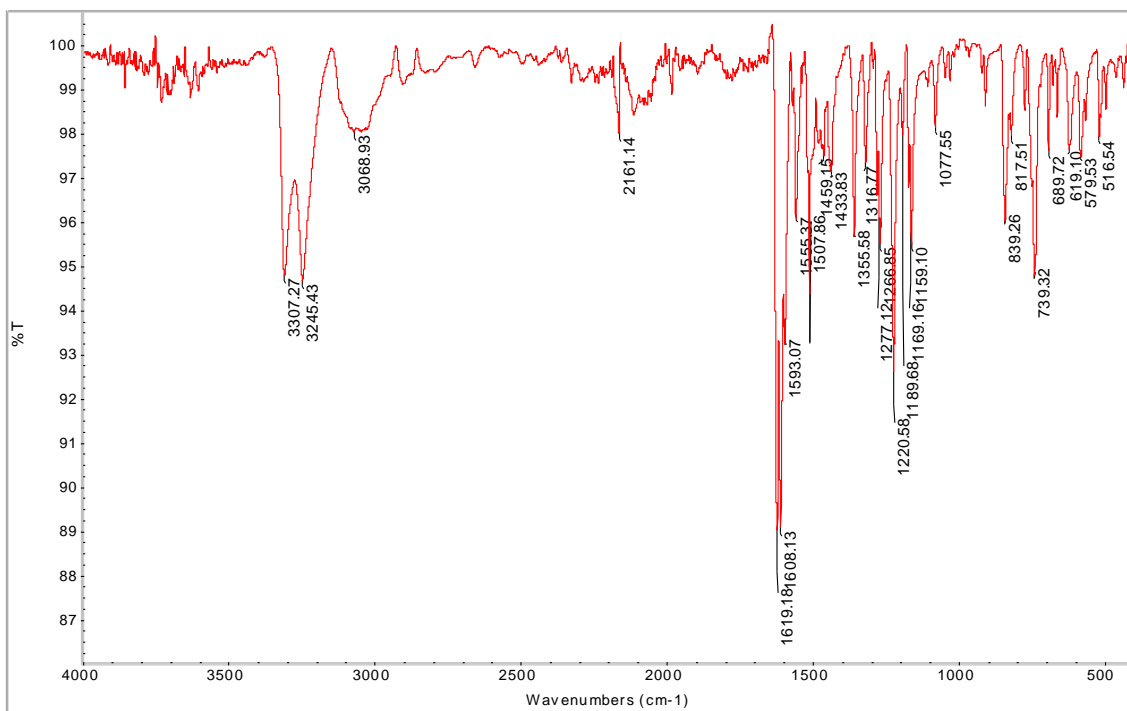

Figure S68: IR spectra of 3d.

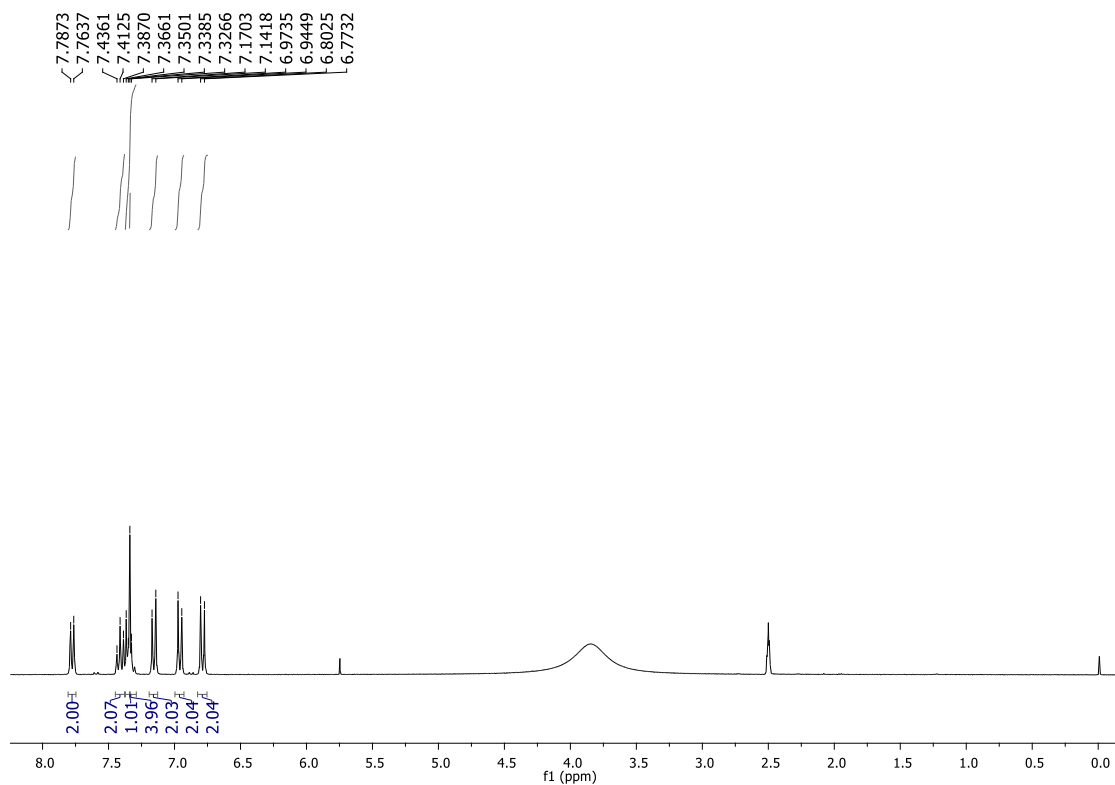

Figure S69: <sup>1</sup>H NMR spectra of 3d (DMSO-*d*<sub>6</sub>, 300 MHz).

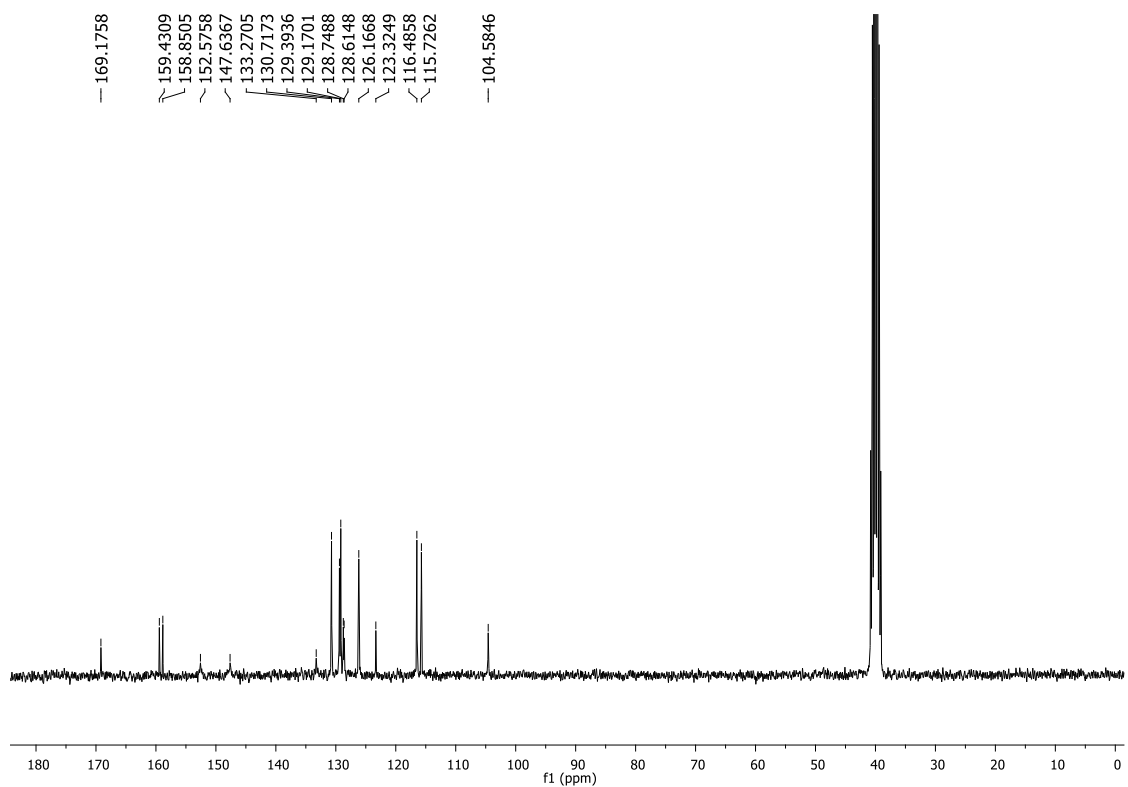

Figure S70:  $^{13}\text{C}$  NMR spectra of **3d** ( $\text{DMSO-}d_6$ , 75 MHz).

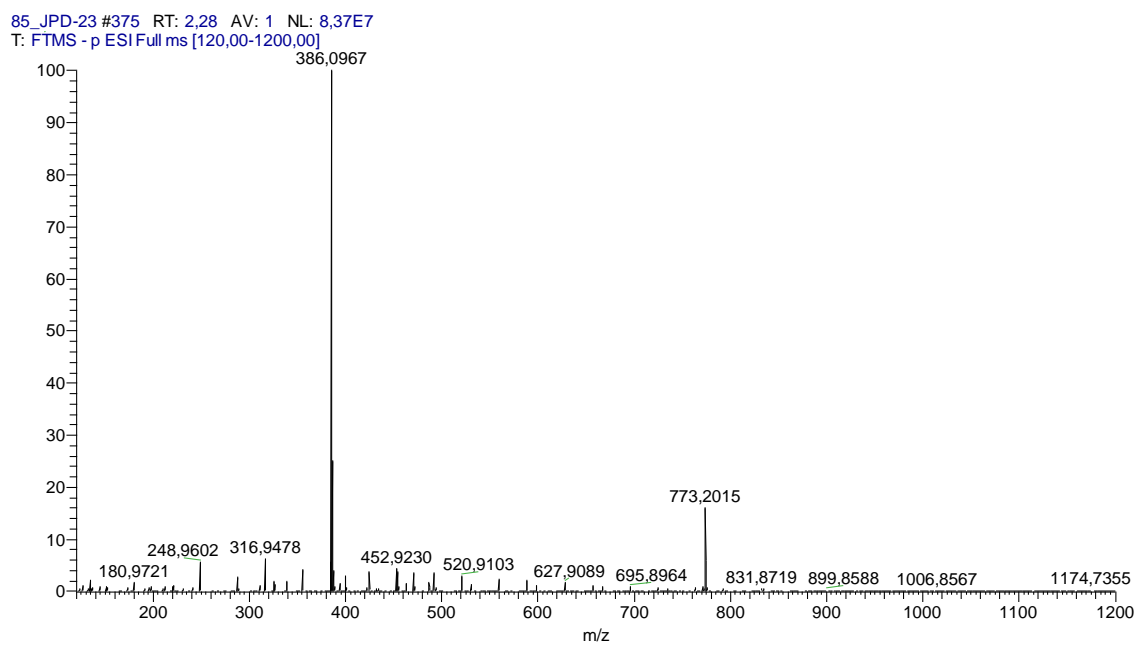

Figure S71: HRMS spectra of **3d**.

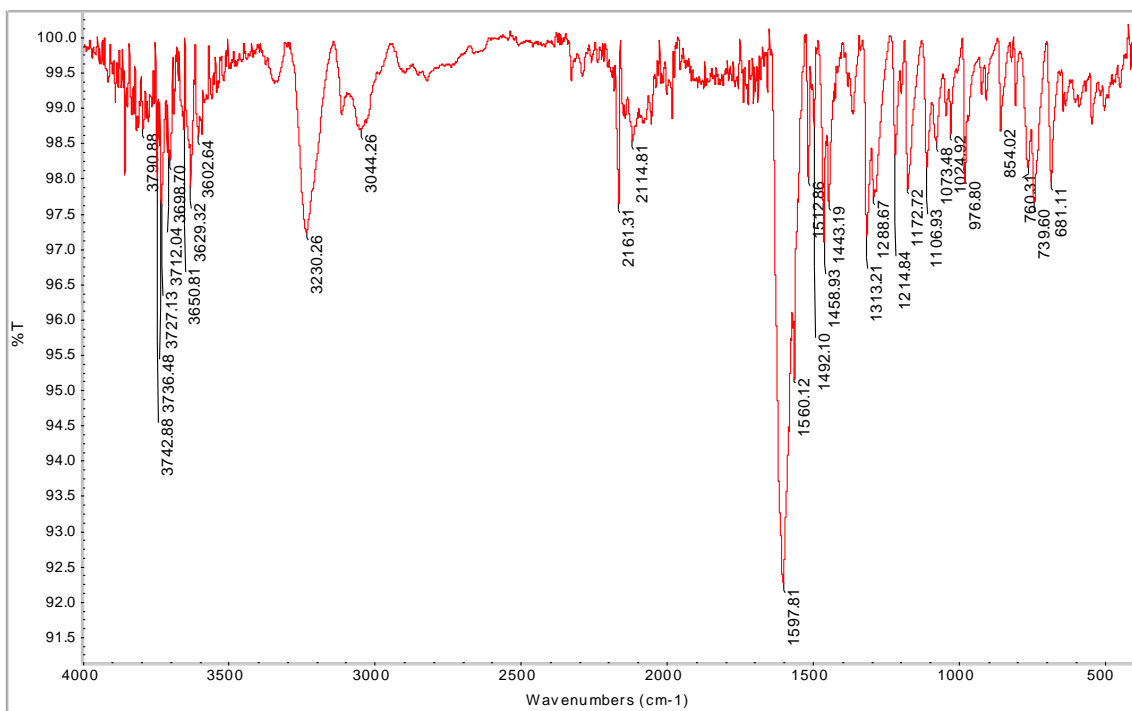

Figure S72: IR spectra of 3e.

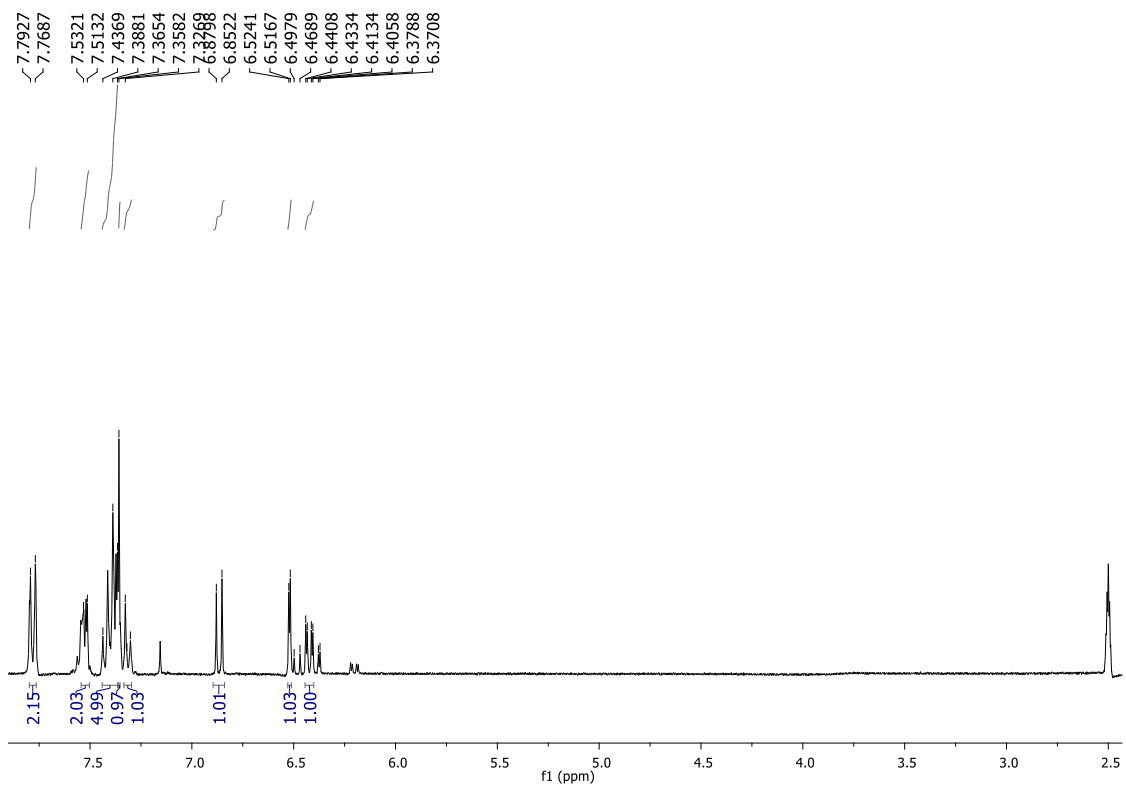

Figure S73: <sup>1</sup>H NMR spectra of 3e (DMSO-*d*<sub>6</sub>, 300 MHz).

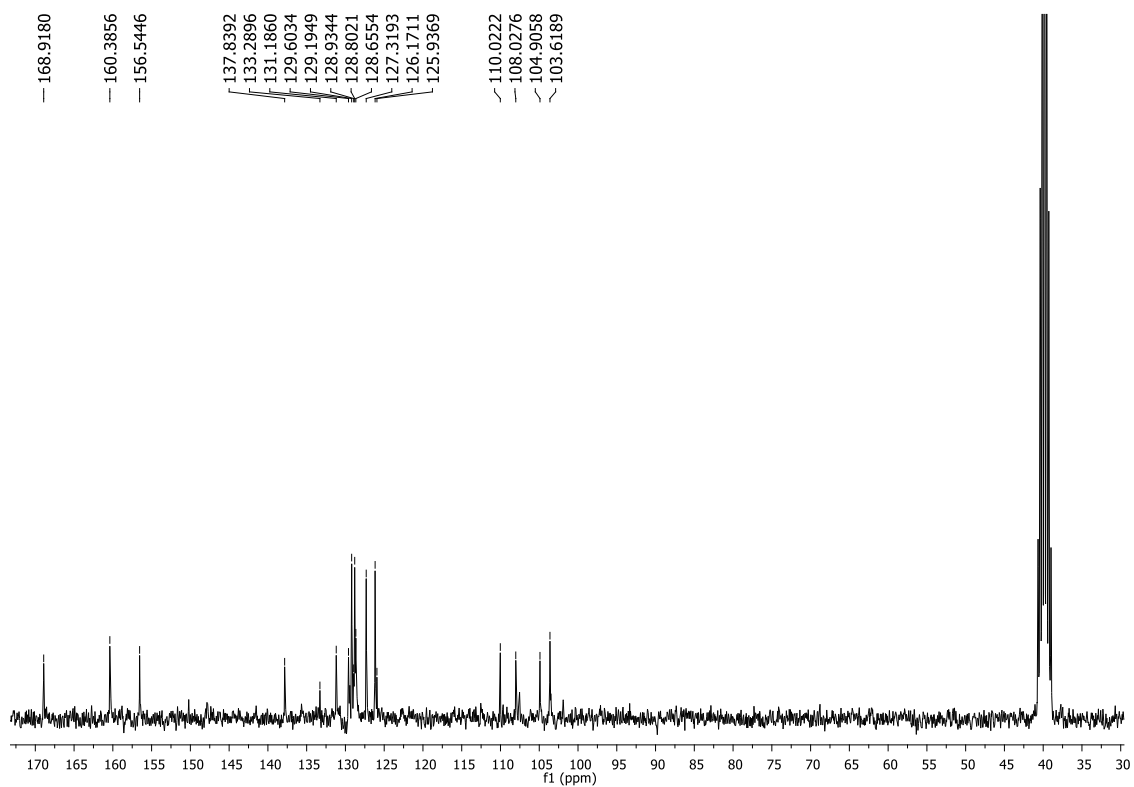

Figure S74:  $^{13}\text{C}$  NMR spectra of **3e** ( $\text{DMSO-}d_6$ , 75 MHz).

86\_JPD-24 #391 RT: 2.38 AV: 1 NL: 1.26E8  
 T: FTMS -p ESI Full ms [120.00-1200.00]

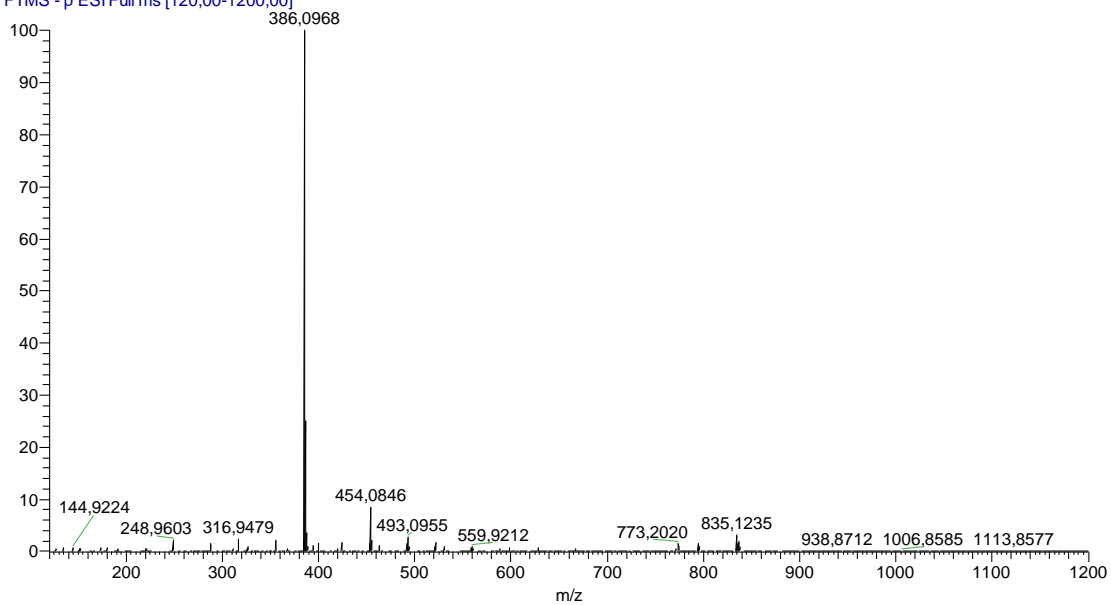

Figure S75: HRMS spectra of **3e**.

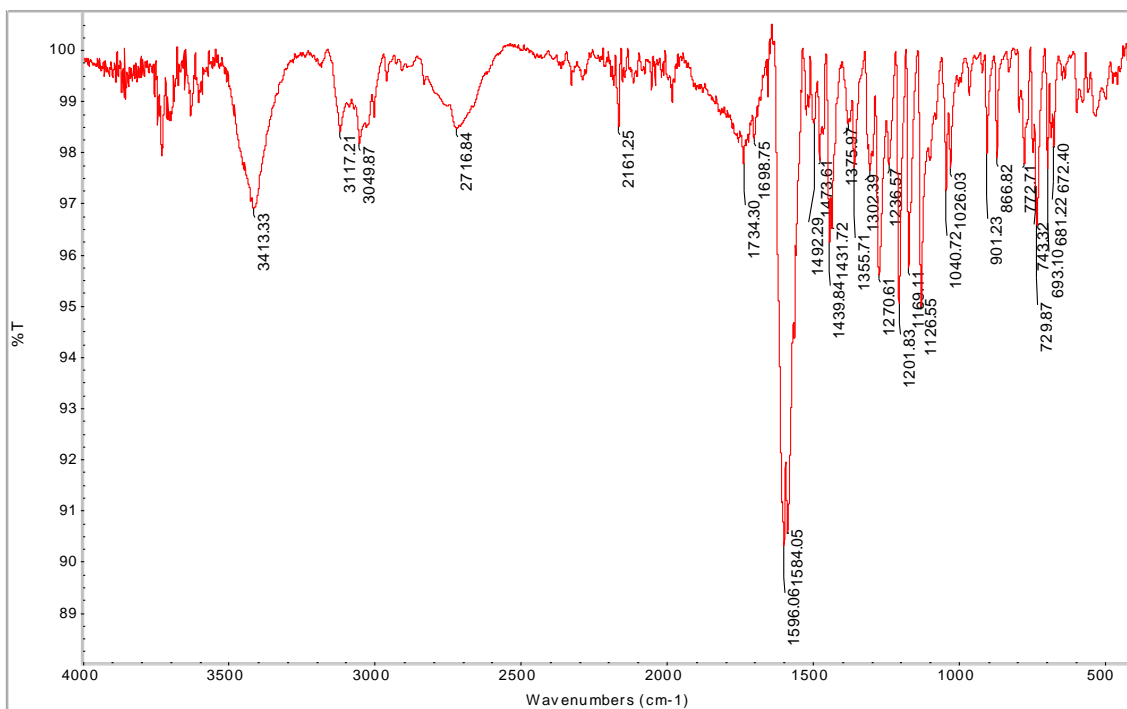

Figure S76: IR spectra of 3f.

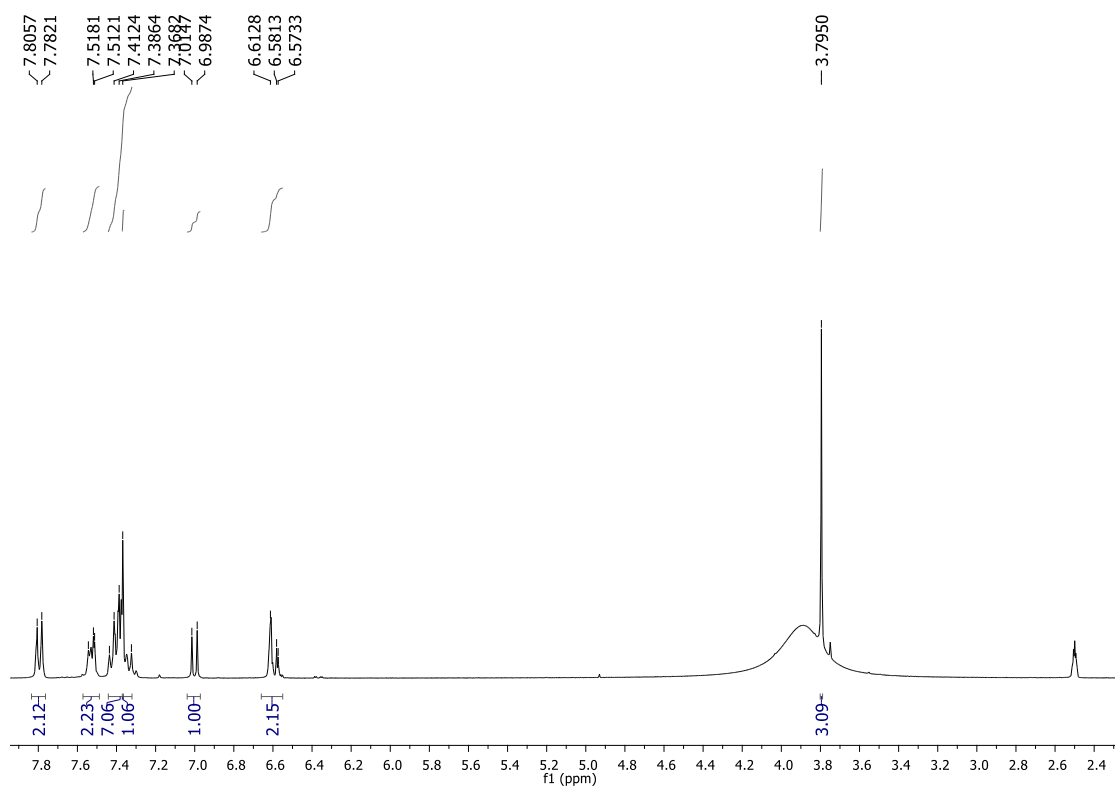

Figure S77: <sup>1</sup>H NMR spectra of 3f (DMSO-*d*<sub>6</sub>, 300 MHz).



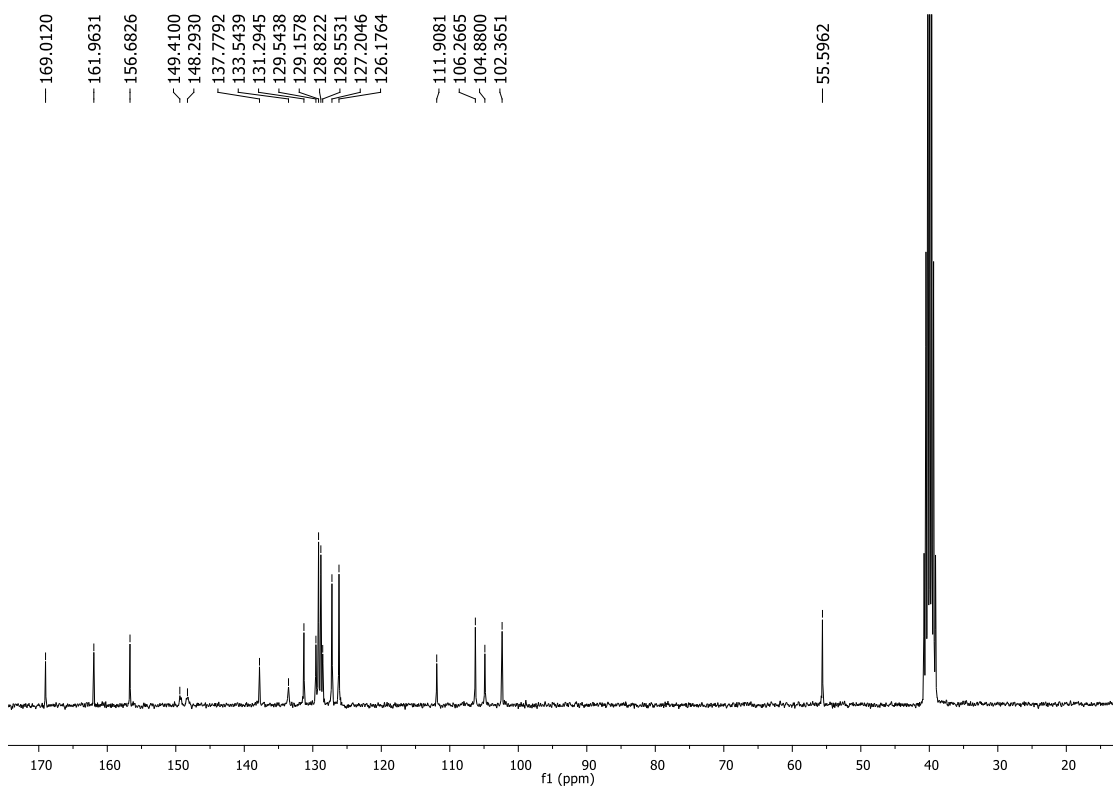

Figure S78:  $^{13}\text{C}$  NMR spectra of **3f** ( $\text{DMSO-}d_6$ , 75 MHz).

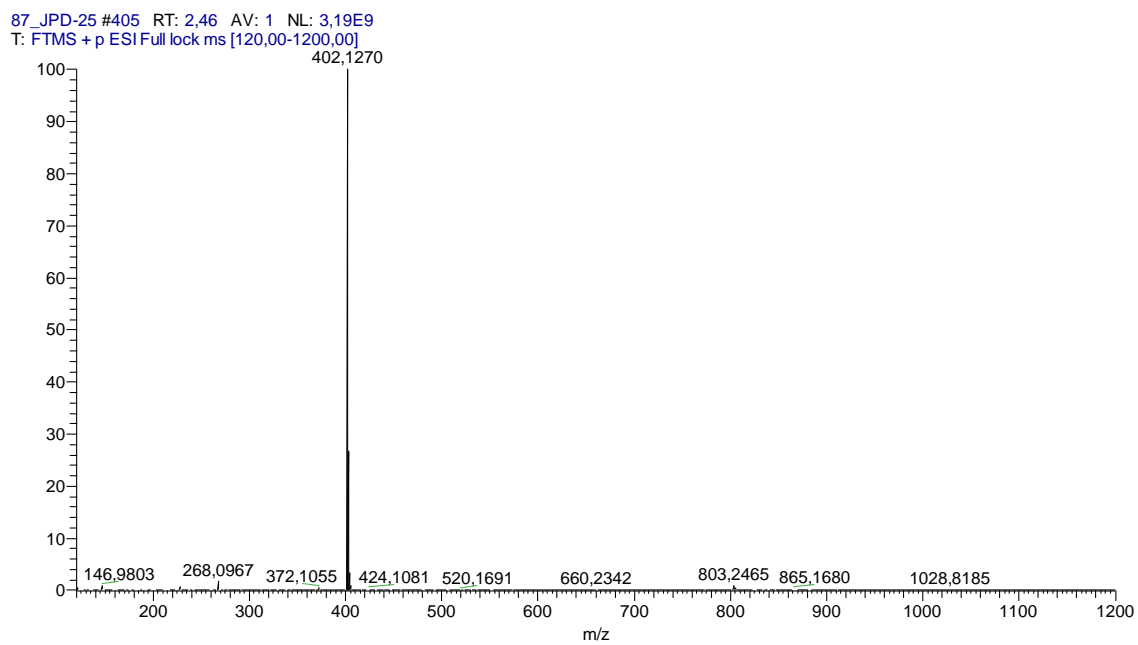

Figure S79: HRMS spectra of **3f**.

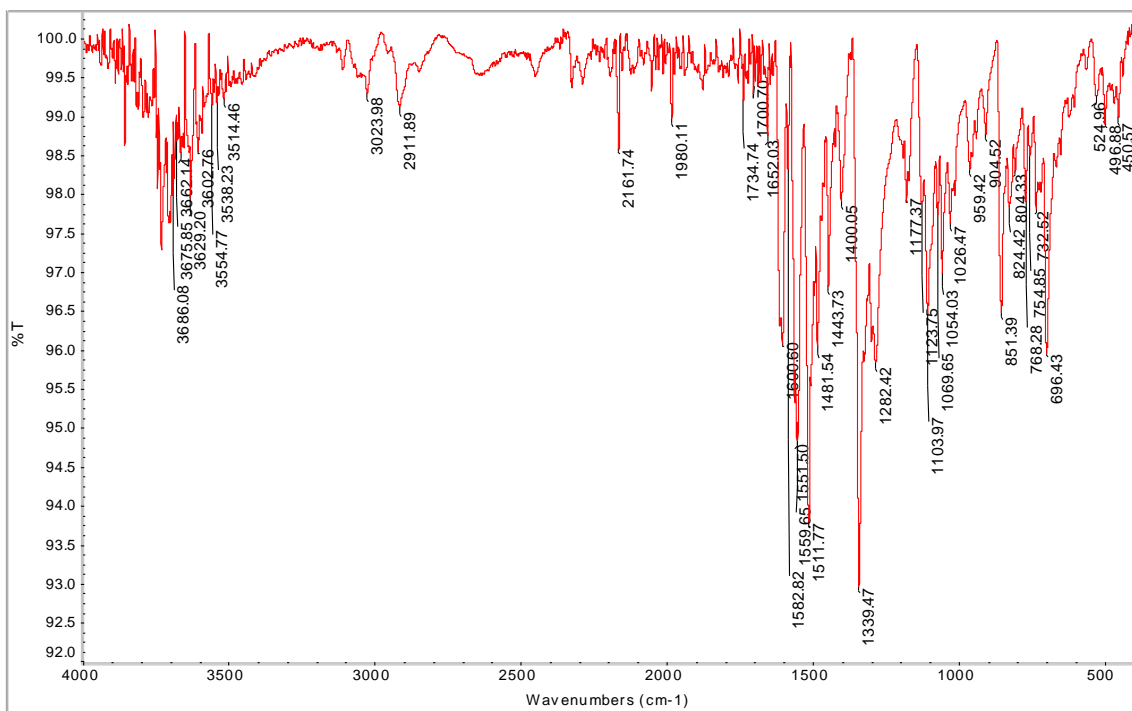

Figure S80: IR spectra of **3g**.

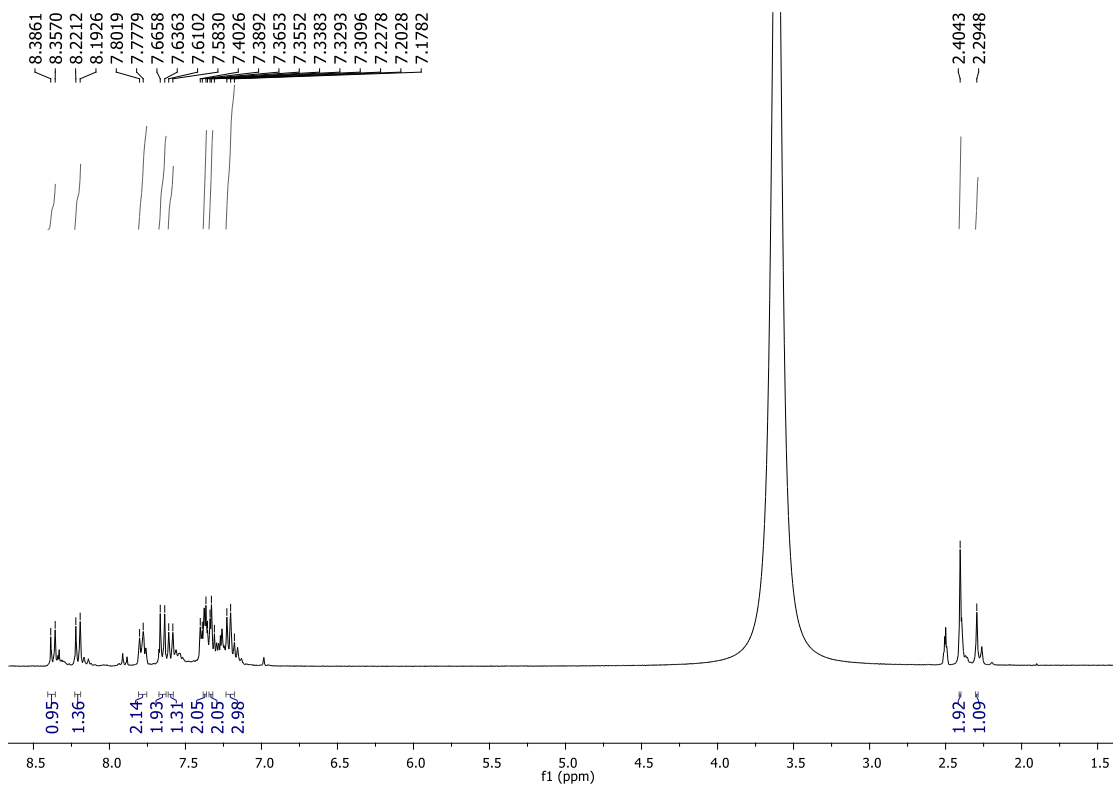

Figure S81:  $^1\text{H}$  NMR spectra of **3g** ( $\text{DMSO-}d_6$ , 300 MHz).

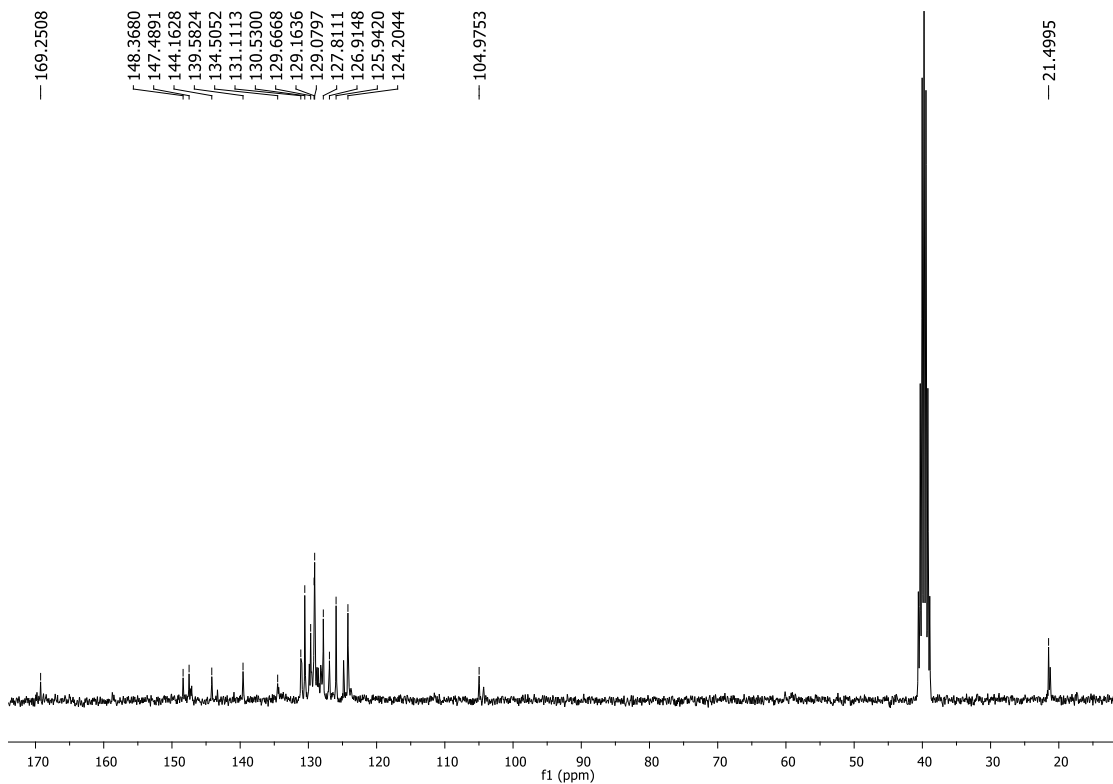

Figure S82:  $^{13}\text{C}$  NMR spectra of **3g** ( $\text{DMSO-}d_6$ , 75 MHz).

89\_JPD-29 #471 RT: 2,86 AV: 1 NL: 1,20E8  
 T: FTMS - p ESI Full ms [120,00-1200,00]

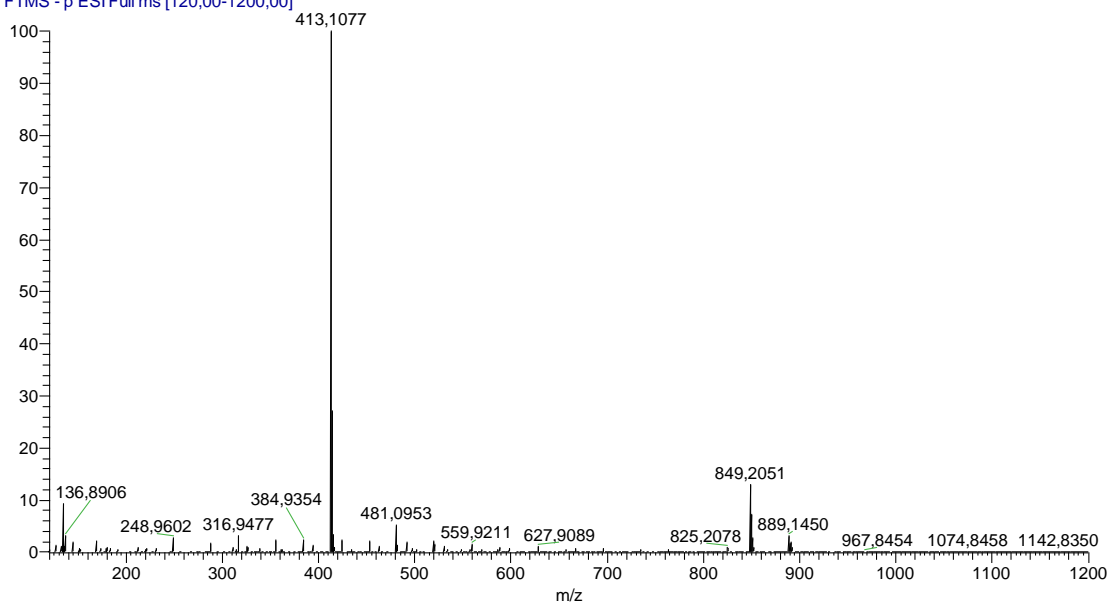

Figure S83: HRMS spectra of **3g**.

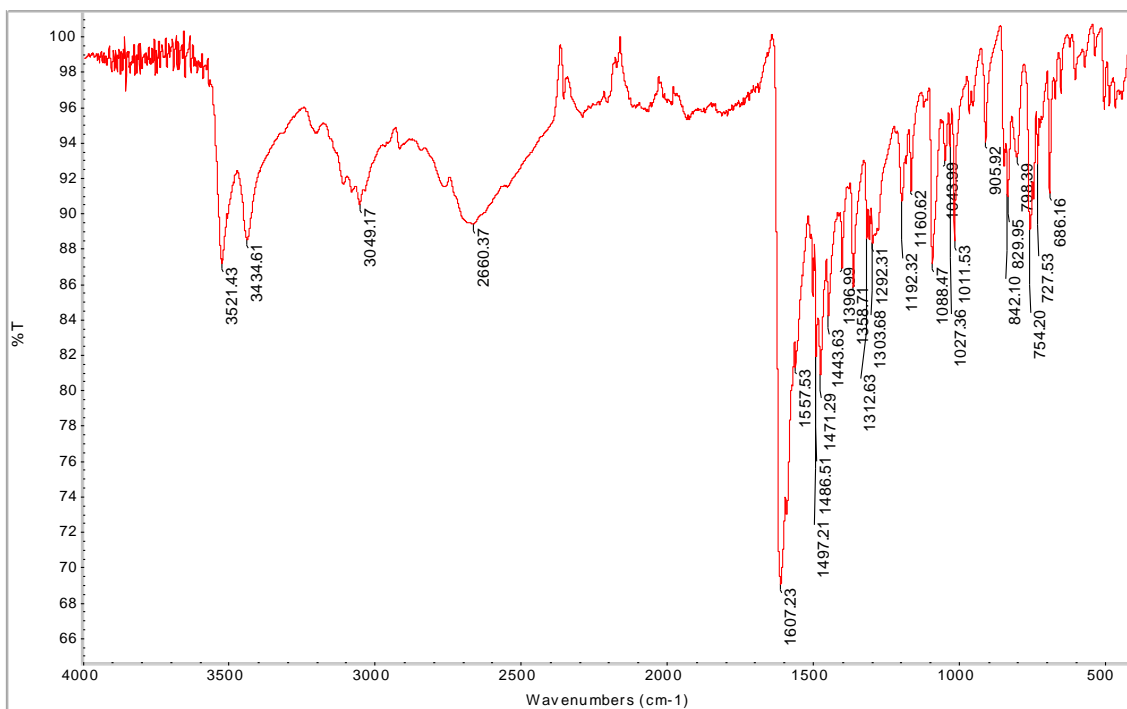

Figure S84: IR spectra of 3h.

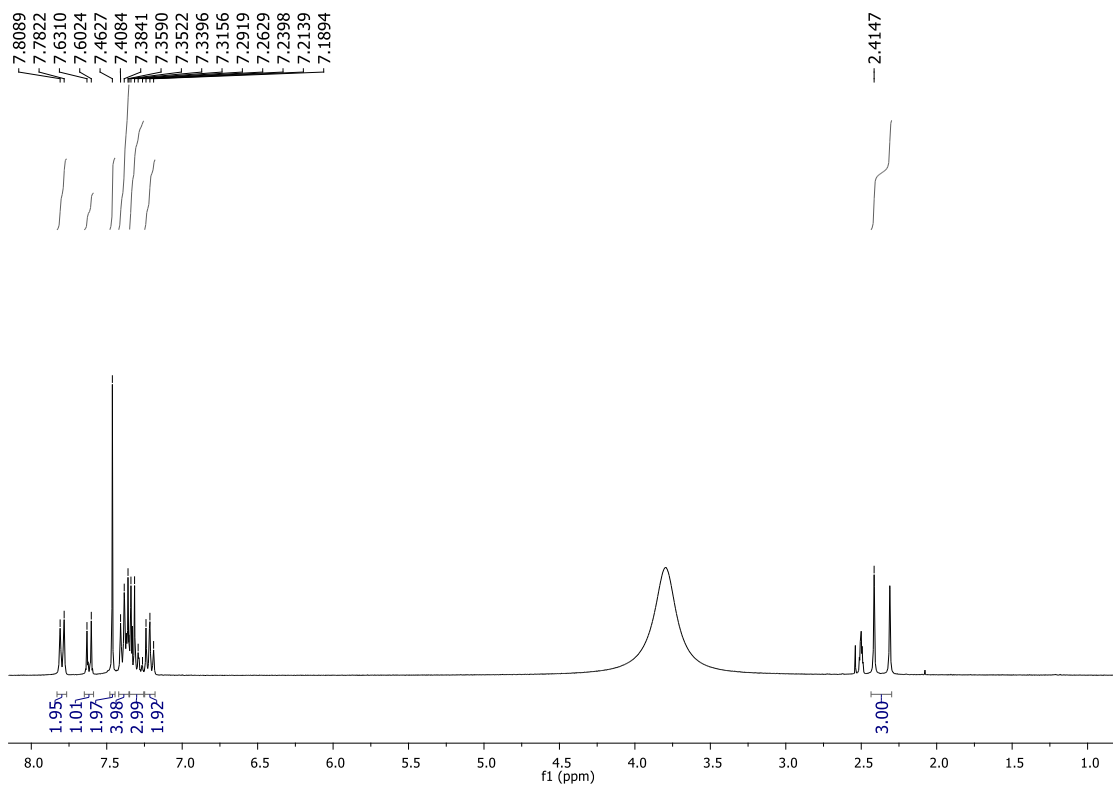

Figure S85: <sup>1</sup>H NMR spectra of 3h (DMSO-*d*<sub>6</sub>, 300 MHz).

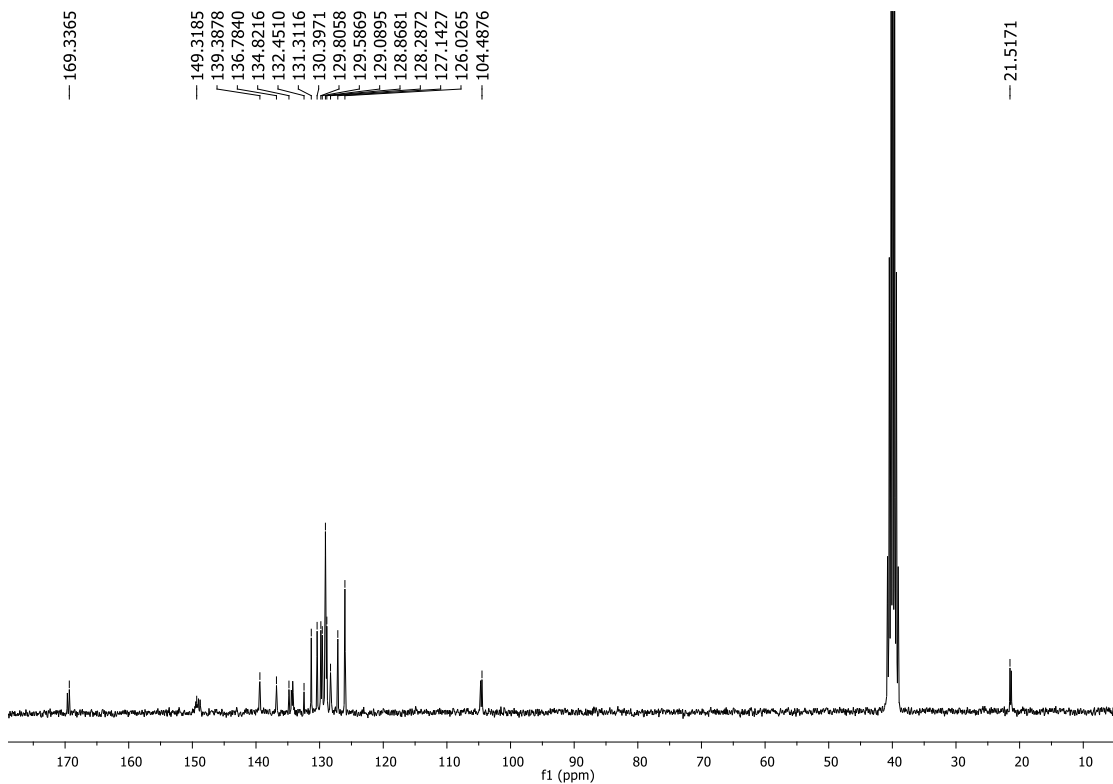

Figure S86:  $^{13}\text{C}$  NMR spectra of **3h** ( $\text{DMSO-}d_6$ , 75 MHz).

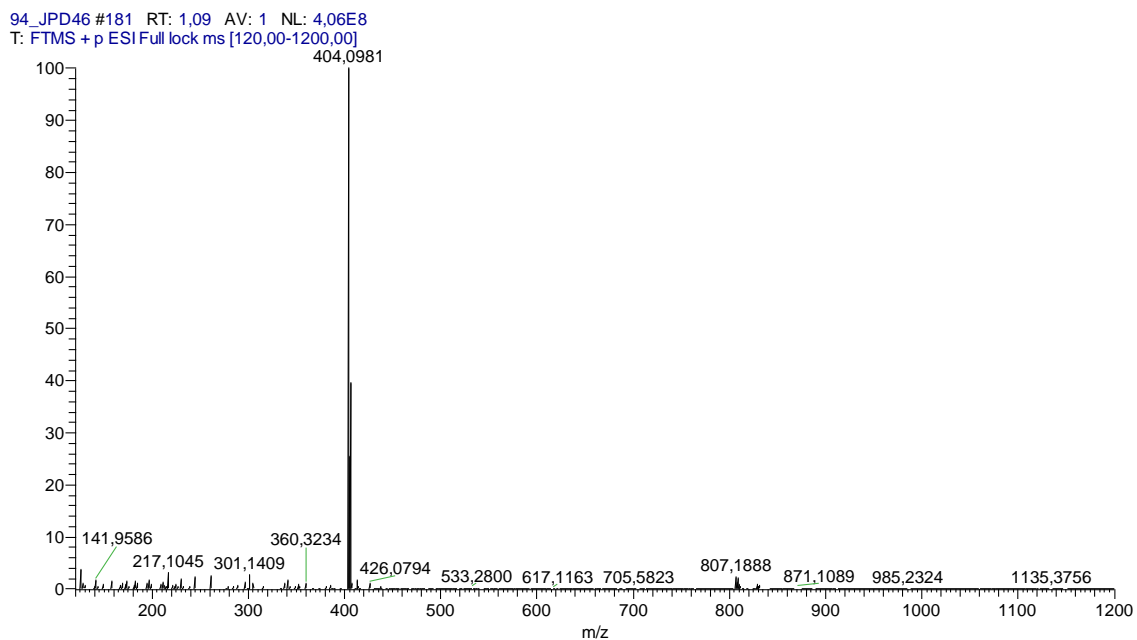

Figure S87: HRMS spectra of **3h**.

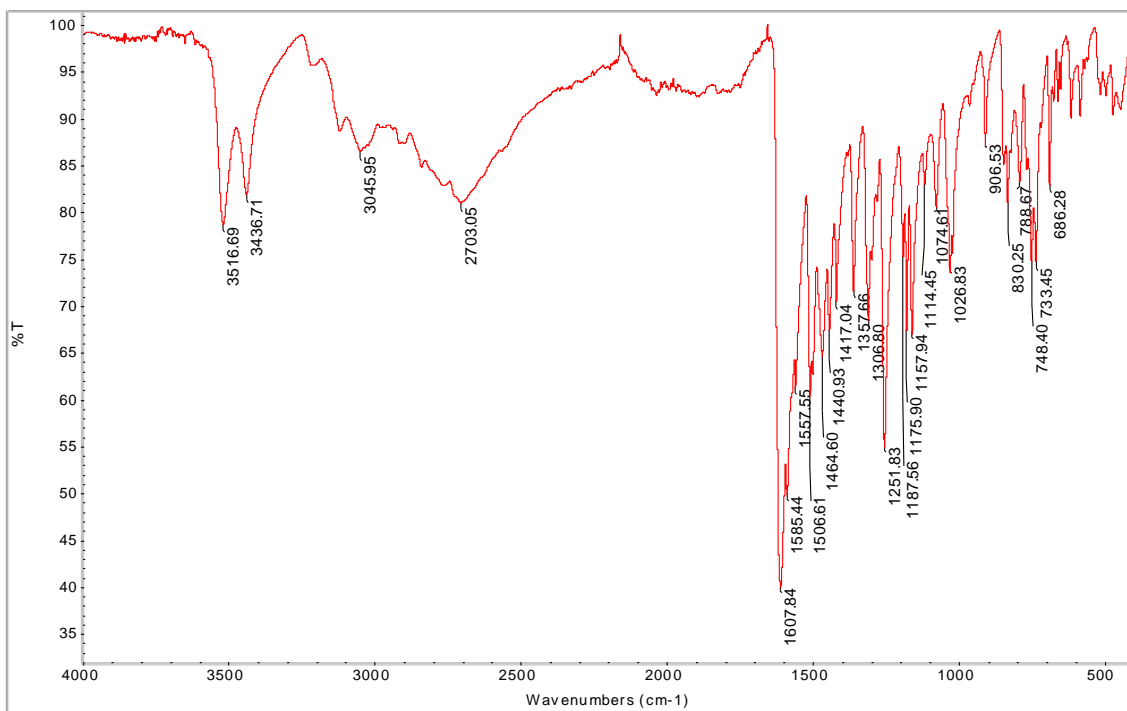

Figure S88: IR spectra of 3i.

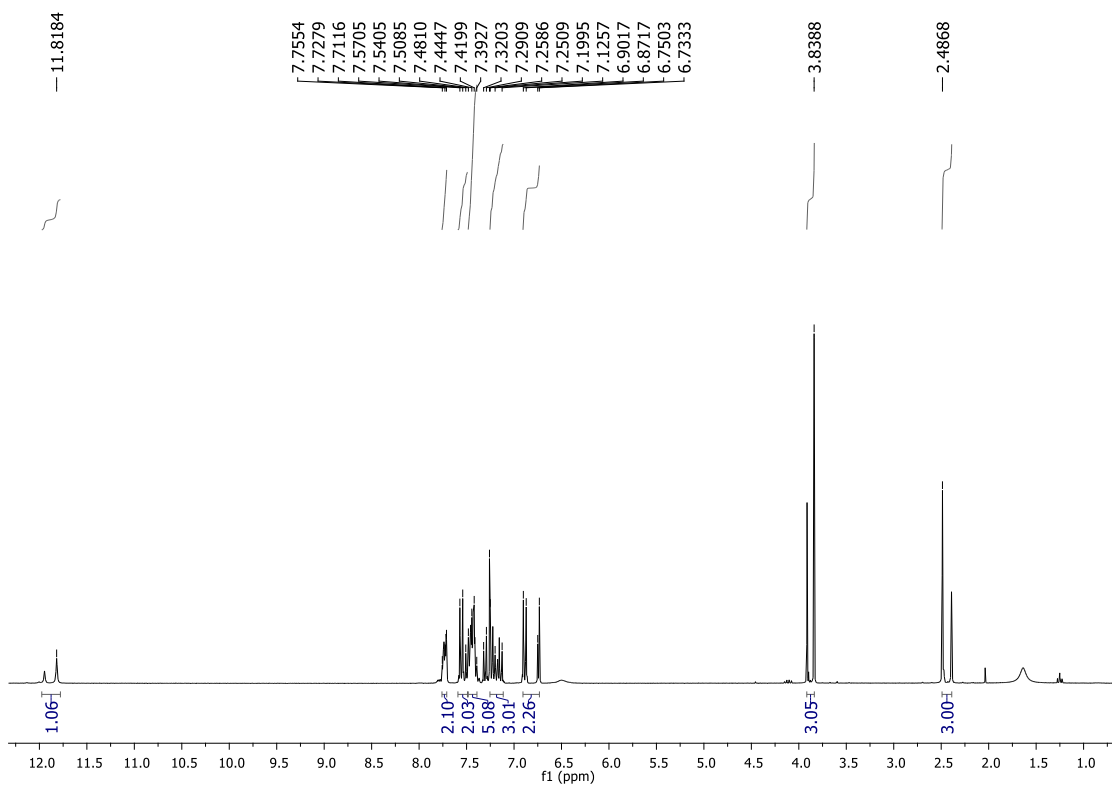

Figure S89:  $^1\text{H}$  NMR spectra of 3i ( $\text{CDCl}_3$ , 300 MHz).

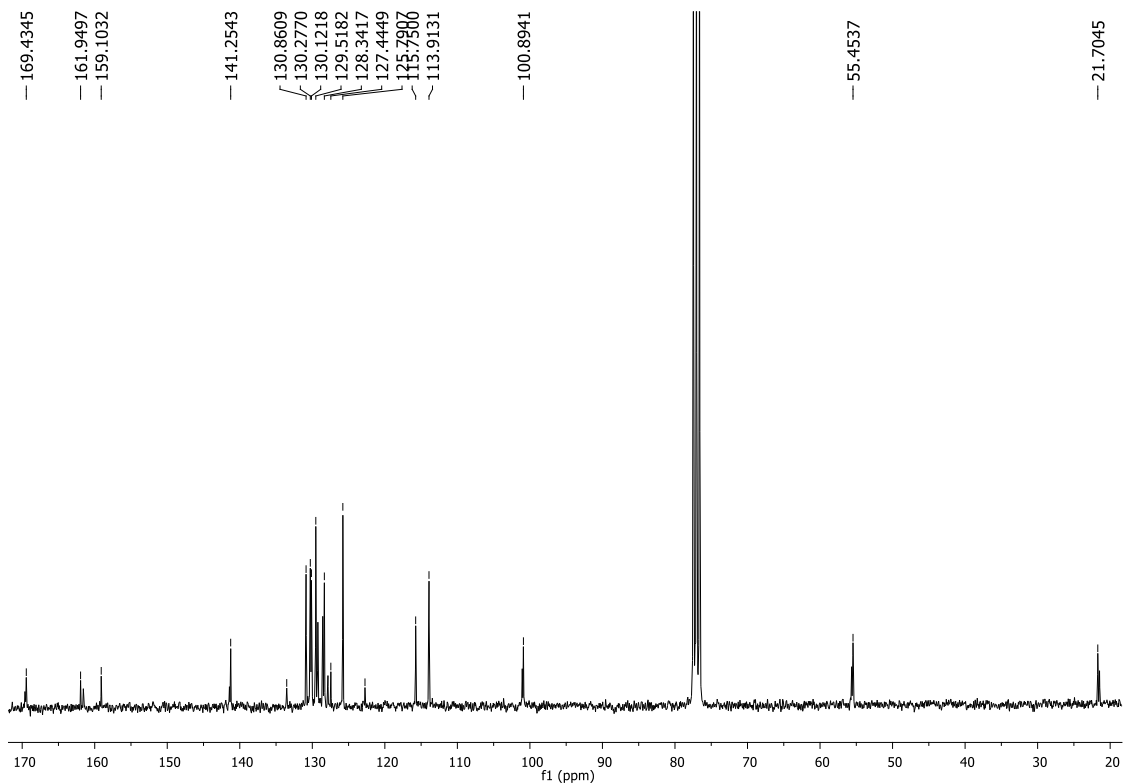

Figure S90:  $^{13}\text{C}$  NMR spectra of **3i** ( $\text{CDCl}_3$ , 75 MHz).

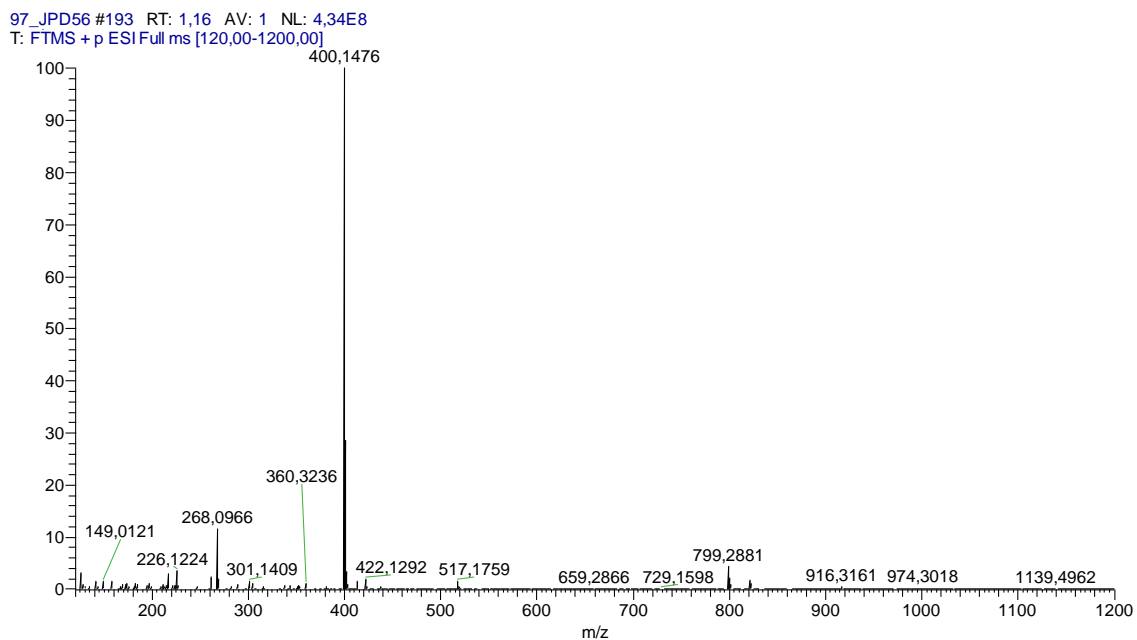

Figure S91: HRMS spectra of **3i**.

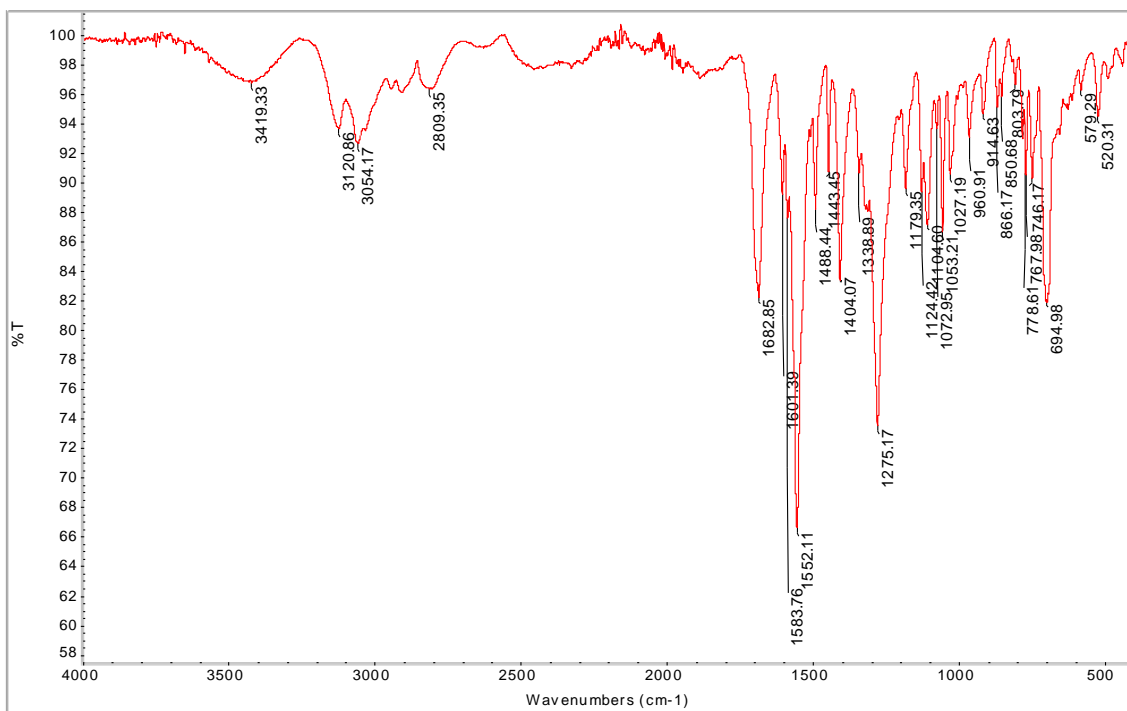

Figure S92: IR spectra of 3i.

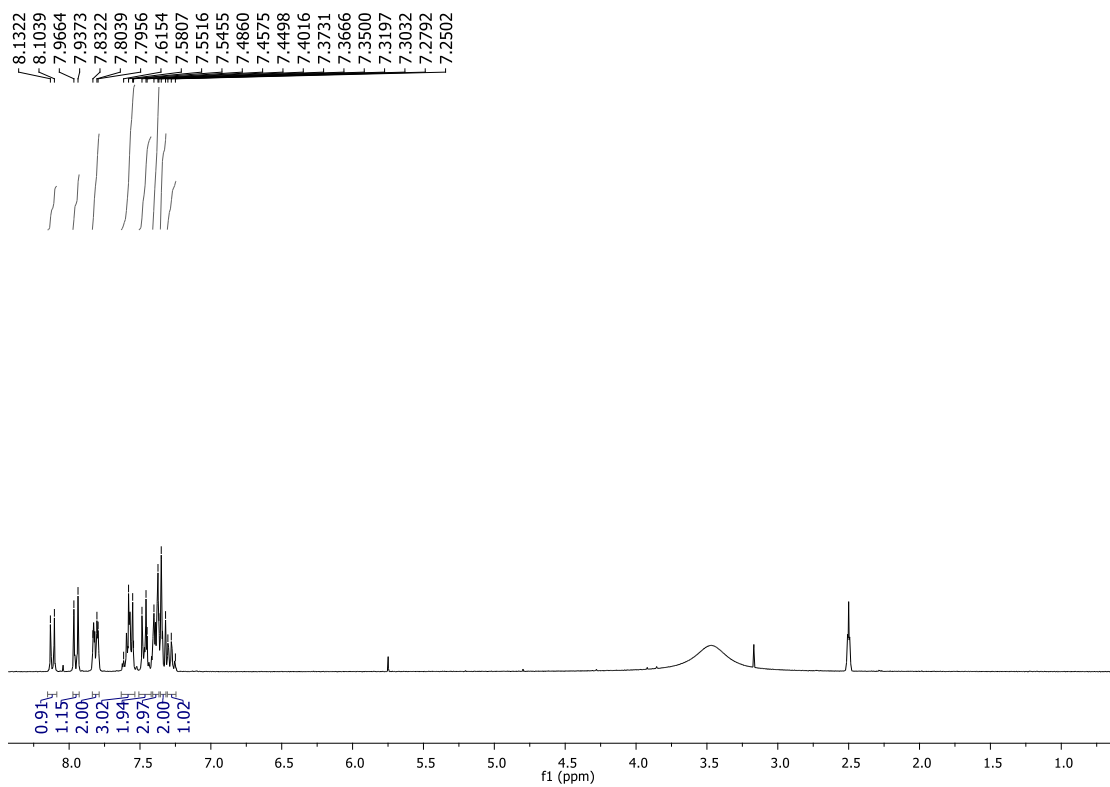

Figure S93: <sup>1</sup>H NMR spectra of 3j (DMSO-*d*<sub>6</sub>, 300 MHz).



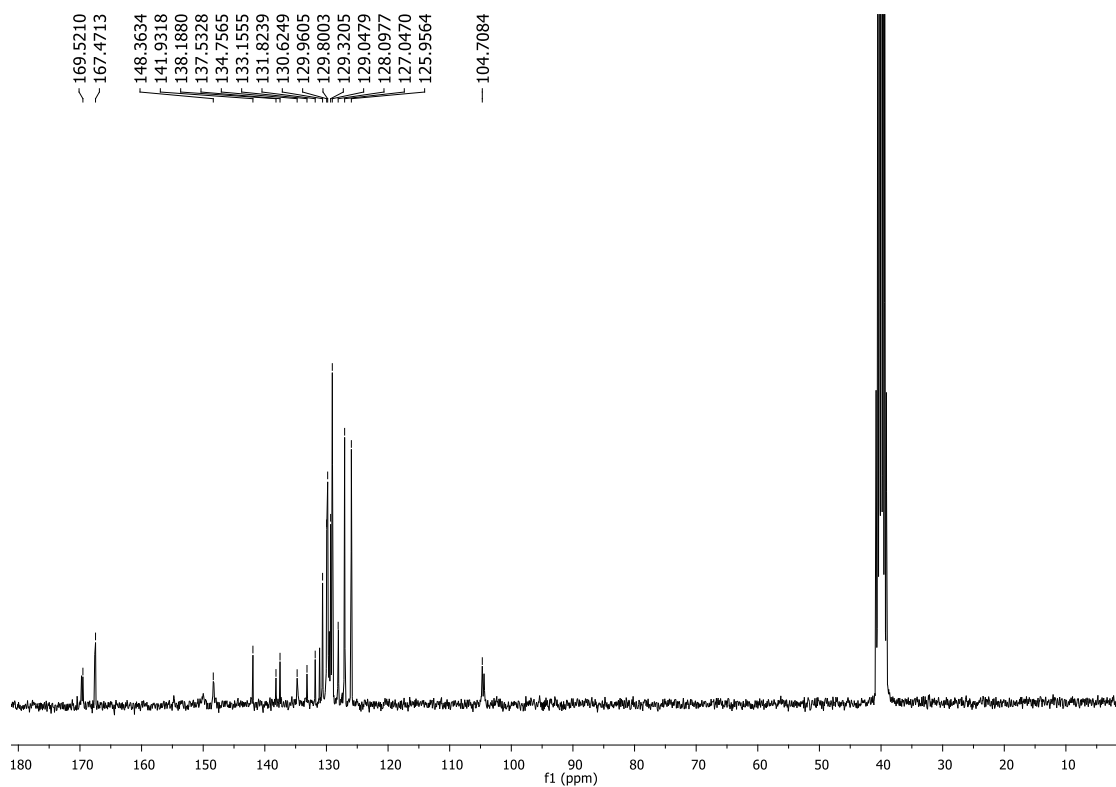

Figure S94:  $^{13}\text{C}$  NMR spectra of **3j** (DMSO- $d_6$ , 75 MHz).

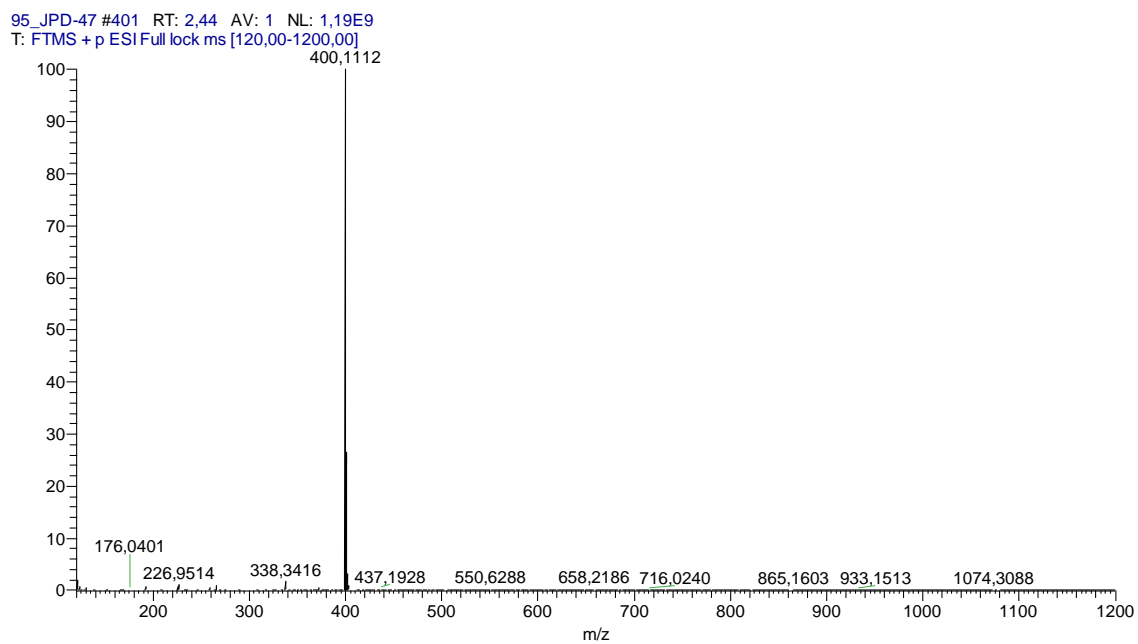

Figure S95: HRMS spectra of **3j**.
